# Supplementary material for: Analysis of Gastric Diseases and Their Symptoms Based on Indexes of Pepsinogen I (PGI) and Pepsinogen II (PGII): Take 1106 Patients as Samples
Source: Hindawi journal article supplement (doi:10.1155/2022/8393351), 2022-05-17
Supplement: f1 [file 8393351.f1.pdf]

| gender | age                  | ID        | Indicator items | index value |
|--------|----------------------|-----------|-----------------|-------------|
| female | 5years 3months       | 699279    | PG I            | 177.0       |
| male   | 10years 4months      | 698576    | PG I            | 191.2       |
| male   | 8years 7months       | 699244    | PG I            | 254.9       |
| female | 9years 7months       | 7972998-3 | PG I            | 114.9       |
| female | 5years 3months       | 7969728-3 | PG I            | 88.3        |
| male   | 3years               | 7971126-3 | PG I            | 117.3       |
| male   | 2years 7months       | 7972110-3 | PG I            | 131.3       |
| male   | 7years 9months       | 7973389-3 | PG I            | 118.9       |
| female | 9years 4months       | 7963363-4 | PG I            | 119.3       |
| female | 10years              | 6674130-4 | PG I            | 86.7        |
| male   | 9years 6months       | 699904    | PG I            | 201.3       |
| female | 5years 9months       | 7904620-3 | PG I            | 91.3        |
| female | 8years 5months       | 5737934-4 | PG I            | 101.9       |
| female | 5years               | 5810524-3 | PG I            | 84.3        |
| male   | 8years 5months       | 4147025-4 | PG I            | 103.1       |
| female | 7years 6months       | 699258    | PG I            | 160.1       |
| male   | 3years 3months       | 7972784-3 | PG I            | 103.4       |
| male   | 4years 1months       | 6383780-4 | PG I            | 89.6        |
| female | 4years 2months 5days | 7974811-4 | PG I            | 118.8       |
| male   | 6years               | 7975004-4 | PG I            | 100.2       |
| male   | 6years               | 4724240-4 | PG I            | 90.7        |
| female | 11years              | 670482    | PG I            | 120.3       |
| male   | 10years 2months      | 695629    | PG I            | 157.6       |
| male   | 3years 11months      | 6640181-4 | PG I            | 101.7       |
| male   | 9years               | 6272602-4 | PG I            | 126.3       |
| male   | 4years 4months       | 6413580-4 | PG I            | 101.4       |
| female | 6years               | 6937158-4 | PG I            | 93.6        |
| female | 17years              | 7830366-3 | PG I            | 156.9       |
| male   | 2years 9months       | 6781393-4 | PG I            | 102.1       |
| male   | 5years               | 7976444-3 | PG I            | 116.0       |
| male   | 3years 8months       | 7362776-3 | PG I            | 114.0       |
| male   | 4years 5months       | 7896567-3 | PG I            | 123.3       |
| male   | 6years 6months       | 4739772-2 | PG I            | 128.1       |
| male   | 4years 1months       | 7452261-3 | PG I            | 135.1       |
| female | 8years 4months       | 700131    | PG I            | 249.7       |
| female | 8years 9months       | 7980678-3 | PG I            | 100.3       |
| male   | 4years 9months       | 6502898-3 | PG I            | 78.0        |

|        |                  |           |      |       |
|--------|------------------|-----------|------|-------|
| male   | 11years 10months | 7932766-4 | PG I | 50.4  |
| female | 4years 1months   | 7973073-3 | PG I | 63.1  |
| male   | 9years 7months   | 700389    | PG I | 79.7  |
| female | 4years 9months   | 7784183-3 | PG I | 59.2  |
| male   | 6years 6months   | 699529    | PG I | 121.3 |
| female | 6years 5months   | 624304    | PG I | 84.4  |
| male   | 4years 6months   | 700881    | PG I | 30.2  |
| female | 3years 6months   | 700665    | PG I | 62.0  |
| male   | 13years 8months  | 700639    | PG I | 77.8  |
| female | 3years 1months   | 6937388-3 | PG I | 53.6  |
| male   | 1years 6months   | 700572    | PG I | 56.6  |
| male   | 3years 2months   | 7986107-3 | PG I | 45.7  |
| male   | 8years 8months   | 7964681-4 | PG I | 31.8  |
| male   | 7years 7months   | 6960244-3 | PG I | 46.3  |
| male   | 4years 1months   | 6109623-3 | PG I | 75.6  |
| female | 5years 1months   | 7471906-3 | PG I | 54.4  |
| female | 5years 5months   | 7842710-3 | PG I | 50.5  |
| male   | 3years 10months  | 7473291-3 | PG I | 39.1  |
| male   | 4years 11months  | 7986092-3 | PG I | 52.8  |
| male   | 2years 11months  | 7464079-3 | PG I | 68.3  |
| female | 4years 5months   | 6021989-2 | PG I | 49.8  |
| male   | 13years 1months  | 3410834-4 | PG I | 104.6 |
| female | 6years 2months   | 4779997-2 | PG I | 58.2  |
| male   | 13years 11months | 700909    | PG I | 125.7 |
| male   | 5years 9months   | 5751008-4 | PG I | 61.2  |
| female | 8years 2months   | 7223608-4 | PG I | 45.7  |
| male   | 8years 4months   | 4241826-2 | PG I | 47.3  |
| female | 3years 3months   | 702811    | PG I | 121.5 |
| male   | 8years 10months  | 7899450-3 | PG I | 82.6  |
| female | 3years 5months   | 7146581-3 | PG I | 44.0  |
| male   | 10years 1months  | 698980    | PG I | 93.0  |
| male   | 3years 10months  | 8001845-3 | PG I | 55.6  |
| female | 5years 11months  | 7888723-3 | PG I | 82.1  |
| female | 3years 9months   | 8005477-3 | PG I | 30.2  |

|        |                  |           |      |       |
|--------|------------------|-----------|------|-------|
| male   | 10years 6months  | 6524385-4 | PG I | 105.7 |
| male   | 4years 11months  | 5748497-4 | PG I | 52.8  |
| male   | 5years 8months   | 5295537-4 | PG I | 70.3  |
| female | 1years 4months   | 7666225-4 | PG I | 175.3 |
| female | 9years 4months   | 8016427-4 | PG I | 120.9 |
| female | 8years 9months   | 7928099-3 | PG I | 150.8 |
| male   | 10years 6months  | 3578968-4 | PG I | 115.2 |
| male   | 3years 7months   | 7961608-3 | PG I | 22.5  |
| male   | 6years 6months   | 6119429-3 | PG I | 176.1 |
| male   | 8years           | 5721496-4 | PG I | 73.2  |
| male   | 3years 6months   | 7793218-3 | PG I | 166.9 |
| male   | 3years 2months   | 8032393-3 | PG I | 107.4 |
| male   | 3years 9months   | 6398641-4 | PG I | 128.8 |
| male   | 11years          | 3911658-4 | PG I | 150.9 |
| female | 7years           | 7733927-3 | PG I | 135.4 |
| male   | 7years           | 7385739-3 | PG I | 124.2 |
| male   | 8years 11months  | 704315    | PG I | 134.8 |
| male   | 11years 3months  | 658125    | PG I | 116.6 |
| male   | 10years 3months  | 704414    | PG I | 67.6  |
| female | 2years 6months   | 6990753-4 | PG I | 76.3  |
| female | 11years          | 7987458-4 | PG I | 119.7 |
| male   | 7years 7months   | 8044968-3 | PG I | 158.2 |
| male   | 6years 8months   | 704487    | PG I | 128.0 |
| male   | 2years 8months   | 7005541-2 | PG I | 124.5 |
| male   | 4years 8months   | 704549    | PG I | 129.9 |
| female | 5years 11months  | 705304    | PG I | 170.1 |
| male   | 3years 1months   | 704562    | PG I | 154.4 |
| male   | 12years 3months  | 693496    | PG I | 242.9 |
| female | 10years 4months  | 493247    | PG I | 171.8 |
| male   | 6years 10months  | 578029    | PG I | 124.7 |
| female | 11years 5months  | 705466    | PG I | 94.9  |
| male   | 4years 6months   | 6092525-3 | PG I | 127.7 |
| male   | 2years 10months  | 8053004-3 | PG I | 109.0 |
| female | 2years 1months   | 8053274-3 | PG I | 119.7 |
| male   | 13years 4months  | 645856    | PG I | 147.2 |
| male   | 12years 11months | 705531    | PG I | 186.8 |
| male   | 8years 6months   | 705563    | PG I | 114.0 |

|        |                  |           |      |       |
|--------|------------------|-----------|------|-------|
| female | 9years 1months   | 705570    | PG I | 183.0 |
| male   | 12years 3months  | 705634    | PG I | 137.5 |
| male   | 12years 10months | 705839    | PG I | 115.2 |
| male   | 11years 9months  | 705590    | PG I | 200.0 |
| male   | 3years 6months   | 6767552-3 | PG I | 98.4  |
| female | 9years 6months   | 705887    | PG I | 144.1 |
| female | 4years 9months   | 705916    | PG I | 114.5 |
| male   | 8years 2months   | 635646    | PG I | 176.7 |
| male   | 4years 5months   | 705947    | PG I | 123.9 |
| male   | 9years 10months  | 686401    | PG I | 150.5 |
| male   | 6years 5months   | 705963    | PG I | 214.7 |
| male   | 4years 4months   | 6220111-2 | PG I | 124.3 |
| male   | 9years 4months   | 291093    | PG I | 179.2 |
| male   | 9years 7months   | 705699    | PG I | 151.3 |
| male   | 13years 6months  | 531559    | PG I | 80.9  |
| female | 8years 2months   | 690675    | PG I | 203.6 |
| female | 12years 10months | 249601    | PG I | 128.5 |
| female | 7years 9months   | 705755    | PG I | 100.7 |
| female | 7years 4months   | 706175    | PG I | 88.2  |
| male   | 13years 2months  | 706220    | PG I | 68.3  |
| male   | 11years 1months  | 666462    | PG I | 168.8 |
| male   | 10years 8months  | 706239    | PG I | 65.1  |
| male   | 10years 7months  | 688024    | PG I | 129.7 |
| male   | 7years           | 706351    | PG I | 106.3 |
| male   | 13years 1months  | 706335    | PG I | 106.3 |
| male   | 12years 2months  | 706410    | PG I | 108.0 |
| female | 9years 9months   | 706415    | PG I | 180.5 |
| female | 8years 1months   | 3934239-4 | PG I | 86.9  |
| male   | 10years 8months  | 706627    | PG I | 151.6 |
| male   | 11years 1months  | 706618    | PG I | 103.7 |
| male   | 5years 11months  | 706445    | PG I | 57.8  |
| male   | 5years 9months   | 706371    | PG I | 103.7 |
| male   | 9years 4months   | 8067225-3 | PG I | 157.5 |
| female | 16years          | 706715    | PG I | 87.4  |
| female | 5years 7months   | 706701    | PG I | 67.1  |
| male   | 4years 11months  | 706468    | PG I | 84.6  |
| male   | 12years 2months  | 706718    | PG I | 148.0 |
| female | 12years 5months  | 706464    | PG I | 164.6 |
| male   | 8years 4months   | 332307    | PG I | 136.3 |

|        |                  |           |      |       |
|--------|------------------|-----------|------|-------|
| male   | 10years 9months  | 4054226-2 | PG I | 76.5  |
| female | 8years 9months   | 706658    | PG I | 64.3  |
| female | 8years 3months   | 5747576-4 | PG I | 80.5  |
| male   | 9years 7months   | 706737    | PG I | 95.6  |
| male   | 13years 11months | 699986    | PG I | 130.2 |
| male   | 10years          | 706881    | PG I | 58.4  |
| male   | 9years 4months   | 706877    | PG I | 53.6  |
| female | 8years 6months   | 706510    | PG I | 66.5  |
| female | 8years 1months   | 706964    | PG I | 126.3 |
| male   | 9years           | 685471    | PG I | 127.3 |
| female | 12years 2months  | 706583    | PG I | 166.2 |
| male   | 4years 2months   | 706574    | PG I | 86.8  |
| female | 8years 10months  | 8073240-3 | PG I | 127.3 |
| male   | 5years           | 707414    | PG I | 82.1  |
| female | 9years           | 707182    | PG I | 105.5 |
| male   | 10years 6months  | 707190    | PG I | 146.1 |
| female | 15years          | 707262    | PG I | 126.3 |
| female | 8years 9months   | 707295    | PG I | 158.6 |
| male   | 13years 4months  | 707320    | PG I | 72.8  |
| female | 6years 1months   | 707329    | PG I | 102.0 |
| male   | 4years           | 6706424-4 | PG I | 104.6 |
| male   | 12years 6months  | 707374    | PG I | 123.8 |
| female | 6years 6months   | 707313    | PG I | 80.8  |
| female | 13years 10months | 653341    | PG I | 180.7 |
| male   | 6years 7months   | 558096    | PG I | 98.3  |
| male   | 13years          | 707463    | PG I | 114.4 |
| male   | 8years 5months   | 707629    | PG I | 193.7 |
| female | 6years 4months   | 707325    | PG I | 61.2  |
| male   | 7years 3months   | 707330    | PG I | 168.3 |
| male   | 5years 8months   | 707484    | PG I | 51.5  |
| male   | 12years 5months  | 707720    | PG I | 86.4  |
| female | 8years 5months   | 7592305-3 | PG I | 59.0  |
| male   | 11years 9months  | 707757    | PG I | 269.7 |
| male   | 10years 6months  | 707766    | PG I | 85.6  |
| female | 8years 8months   | 707527    | PG I | 70.5  |
| male   | 10years 11months | 707913    | PG I | 49.5  |

|        |                  |           |      |       |
|--------|------------------|-----------|------|-------|
| male   | 12years 9months  | 707915    | PG I | 110.8 |
| male   | 2years 10months  | 6978064-3 | PG I | 37.3  |
| male   | 3years 6months   | 6633022-4 | PG I | 41.3  |
| male   | 11years 7months  | 707991    | PG I | 59.8  |
| female | 2years 6months   | 707580    | PG I | 18.7  |
| female | 2years 11months  | 707596    | PG I | 58.1  |
| female | 10years          | 691969    | PG I | 137.2 |
| male   | 5years 8months   | 708001    | PG I | 31.9  |
| male   | 12years 7months  | 708329    | PG I | 244.6 |
| male   | 2years 3months   | 7328852-3 | PG I | 36.1  |
| male   | 5years 9months   | 8065452-3 | PG I | 60.8  |
| male   | 9years 9months   | 708404    | PG I | 49.8  |
| male   | 3years 10months  | 708401    | PG I | 33.3  |
| male   | 3years 3months   | 708406    | PG I | 39.8  |
| female | 11years 1months  | 708037    | PG I | 27.8  |
| female | 10years 6months  | 708468    | PG I | 59.9  |
| male   | 17years          | 7346286-3 | PG I | 78.2  |
| female | 3years 8months   | 663817    | PG I | 62.0  |
| female | 6years 4months   | 708728    | PG I | 62.2  |
| male   | 7years 2months   | 705553    | PG I | 39.5  |
| male   | 8years 9months   | 446802    | PG I | 54.4  |
| male   | 5years 1months   | 8085074-4 | PG I | 57.3  |
| male   | 8years 9months   | 708188    | PG I | 120.7 |
| female | 8years 7months   | 709056    | PG I | 48.3  |
| male   | 2years 8months   | 7068845-3 | PG I | 43.9  |
| female | 14years          | 709093    | PG I | 61.8  |
| female | 2years 7months   | 709116    | PG I | 56.7  |
| male   | 13years 3months  | 709152    | PG I | 79.1  |
| male   | 7years 10months  | 709176    | PG I | 80.2  |
| male   | 5years 2months   | 709196    | PG I | 71.0  |
| female | 6years 7months   | 709231    | PG I | 58.3  |
| male   | 13years 8months  | 709370    | PG I | 47.1  |
| female | 10years 10months | 709448    | PG I | 21.1  |
| male   | 7years 3months   | 7859687-3 | PG I | 45.6  |
| female | 1years 5months   | 709454    | PG I | 260.3 |
| female | 11years 10months | 709389    | PG I | 34.1  |
| male   | 12years 1months  | 190725    | PG I | 65.0  |
| male   | 11years 2months  | 709519    | PG I | 87.9  |
| male   | 16years          | 564216    | PG I | 270.6 |
| male   | 13years 7months  | 697058    | PG I | 62.0  |

|        |                  |           |      |       |
|--------|------------------|-----------|------|-------|
| female | 12years 2months  | 709785    | PG I | 43.4  |
| male   | 3years 7months   | 8106021-3 | PG I | 147.5 |
| male   | 11years          | 656341    | PG I | 83.2  |
| male   | 11years 4months  | 709549    | PG I | 79.6  |
| male   | 8years 10months  | 709555    | PG I | 37.8  |
| male   | 2years 9months   | 708922    | PG I | 60.2  |
| female | 15years          | 698961    | PG I | 41.0  |
| female | 9years 10months  | 8110361-3 | PG I | 35.7  |
| male   | 7years 4months   | 8109733-3 | PG I | 82.8  |
| male   | 13years 9months  | 648337    | PG I | 45.4  |
| male   | 10years 8months  | 709822    | PG I | 47.4  |
| female | 13years 8months  | 709824    | PG I | 84.0  |
| male   | 10years 10months | 709815    | PG I | 42.1  |
| female | 6years 6months   | 709834    | PG I | 34.0  |
| female | 7years 4months   | 709864    | PG I | 82.3  |
| female | 10years 1months  | 710216    | PG I | 64.5  |
| male   | 10years 4months  | 709922    | PG I | 137.0 |
| male   | 12years 9months  | 710373    | PG I | 106.1 |
| male   | 12years 9months  | 698800    | PG I | 40.8  |
| male   | 15years          | 710393    | PG I | 30.6  |
| male   | 13years 1months  | 710136    | PG I | 133.2 |
| male   | 10years 6months  | 710415    | PG I | 70.4  |
| female | 3years 8months   | 549938    | PG I | 48.7  |
| male   | 9years 5months   | 706909    | PG I | 64.9  |
| female | 9years 10months  | 710605    | PG I | 43.9  |
| female | 12years 5months  | 710597    | PG I | 216.2 |
| female | 6years 10months  | S32664    | PG I | 70.1  |
| female | 10years 3months  | 710243    | PG I | 67.2  |
| male   | 9years 7months   | 676039    | PG I | 56.8  |
| female | 9years 8months   | 710817    | PG I | 81.6  |
| female | 10years          | 711201    | PG I | 79.9  |
| female | 12years 8months  | 706249    | PG I | 73.7  |
| female | 2years 10months  | 7924824-3 | PG I | 43.1  |
| male   | 11years 6months  | 711314    | PG I | 43.6  |
| male   | 5years 11months  | 537285    | PG I | 75.5  |
| female | 7years 5months   | 604618    | PG I | 51.0  |
| male   | 9years           | 685471    | PG I | 65.4  |
| male   | 13years 2months  | 690943    | PG I | 100.5 |

|        |                  |           |      |       |
|--------|------------------|-----------|------|-------|
| male   | 1years 9months   | 7384820-3 | PG I | 52.2  |
| female | 7years 4months   | 710907    | PG I | 39.2  |
| male   | 9years 9months   | 710908    | PG I | 47.9  |
| female | 10years 1months  | 710905    | PG I | 50.8  |
| female | 3years           | 710919    | PG I | 64.6  |
| male   | 11years 6months  | 252975    | PG I | 44.5  |
| female | 6years 10months  | 712520    | PG I | 87.5  |
| female | 3years 11months  | 677393    | PG I | 19.1  |
| male   | 10years 3months  | 712495    | PG I | 65.4  |
| male   | 3years 5months   | 8042845-3 | PG I | 64.2  |
| male   | 8years 11months  | 710992    | PG I | 31.7  |
| female | 13years 3months  | 711620    | PG I | 167.7 |
| female | 4years 10months  | 669451    | PG I | 26.6  |
| male   | 13years 2months  | 711272    | PG I | 251.9 |
| male   | 3years 3months   | 7119838-3 | PG I | 40.4  |
| male   | 13years 5months  | 712046    | PG I | 47.6  |
| male   | 10years 4months  | 7150123-3 | PG I | 74.5  |
| male   | 13years 3months  | 712114    | PG I | 133.6 |
| male   | 7years 9months   | 712207    | PG I | 51.6  |
| male   | 9years 8months   | 712172    | PG I | 63.3  |
| female | 14years          | 712381    | PG I | 53.7  |
| male   | 12years          | 712748    | PG I | 95.7  |
| female | 9years 8months   | 712827    | PG I | 74.2  |
| female | 10years 7months  | 712818    | PG I | 57.3  |
| male   | 9months 4days    | 712611    | PG I | 33    |
| female | 3years 8months   | 8109428-3 | PG I | 50.9  |
| male   | 1years 8months   | 8156707-3 | PG I | 63.3  |
| male   | 10years 11months | 368354    | PG I | 63.9  |
| male   | 2years 6months   | 8157049-4 | PG I | 52.3  |
| female | 5years 6months   | 472537    | PG I | 94.8  |
| female | 12years 11months | 713021    | PG I | 47.9  |
| female | 10years 5months  | 713019    | PG I | 115.0 |
| male   | 10years 4months  | 713338    | PG I | 72.5  |
| male   | 13years 6months  | 714614    | PG I | 66.6  |
| female | 11years 5months  | 714670    | PG I | 38.5  |
| male   | 13years 2months  | 3398251-4 | PG I | 51.9  |
| female | 12years 11months | 714756    | PG I | 83.9  |
| female | 12years 10months | 714766    | PG I | 38.9  |
| female | 5years 11months  | 503196    | PG I | 37.3  |



|        |                 |           |      |       |
|--------|-----------------|-----------|------|-------|
| female | 12years 7months | 715232    | PG I | 69.7  |
| female | 5years 9months  | 8164577-3 | PG I | 37.0  |
| male   | 9years 7months  | 715264    | PG I | 54.7  |
| male   | 5years          | 6817844-4 | PG I | 29.9  |
| male   | 9years 6months  | 340846    | PG I | 40.1  |
| female | 8years 6months  | 713151    | PG I | 31.8  |
| male   | 4years 8months  | 8149732-3 | PG I | 46.8  |
| male   | 7years          | 668191    | PG I | 153.9 |
| male   | 11years 1months | 713172    | PG I | 219.5 |
| female | 5years 9months  | 714398    | PG I | 75.5  |
| female | 3years 7months  | 714826    | PG I | 67.5  |
| female | 5years 4months  | 5673608-4 | PG I | 66.6  |
| female | 6years 10months | 713833    | PG I | 28.3  |
| female | 7years 10months | 713473    | PG I | 54.3  |
| male   | 9years 3months  | 713476    | PG I | 41.4  |
| female | 2years 9months  | 8174769-3 | PG I | 36.9  |
| female | 13years 4months | 713948    | PG I | 72.7  |
| female | 3years 4months  | 7293423-4 | PG I | 35.6  |
| male   | 13years 2months | 714051    | PG I | 104.6 |
| male   | 10years 9months | 714049    | PG I | 71.6  |
| female | 4years 3months  | 714058    | PG I | 22.1  |
| male   | 12years 6months | 4157759-1 | PG I | 71.0  |
| female | 10years         | 714112    | PG I | 36.3  |
| female | 9years 5months  | 714097    | PG I | 82.5  |
| male   | 6years          | 714099    | PG I | 121.0 |
| male   | 11years 4months | 694106    | PG I | 68.7  |
| female | 7years 8months  | 713560    | PG I | 31.9  |
| male   | 10years 4months | 675863    | PG I | 88.9  |
| female | 5years 4months  | 713598    | PG I | 44.3  |
| female | 12years 9months | 502694    | PG I | 38.0  |
| female | 12years 5months | 542784    | PG I | 78.7  |
| male   | 10years 7months | 659995    | PG I | 56.5  |
| male   | 7years 10months | 713637    | PG I | 69.0  |
| male   | 7years 10months | 713618    | PG I | 35.5  |
| male   | 4years 8months  | 5919127-4 | PG I | 62.5  |
| male   | 3years          | 655953    | PG I | 46.7  |

|        |                  |           |      |       |
|--------|------------------|-----------|------|-------|
| female | 2years 6months   | S32731    | PG I | 38.9  |
| male   | 1years 7months   | 7654544-3 | PG I | 33.2  |
| female | 5years 6months   | 713798    | PG I | 58.3  |
| male   | 10years 1months  | 694658    | PG I | 111.9 |
| male   | 2years 5months   | 7307918-3 | PG I | 40.2  |
| male   | 4years 3months   | 715056    | PG I | 26.1  |
| female | 3years 7months   | 715549    | PG I | 50.7  |
| male   | 6years 3months   | 715572    | PG I | 63.8  |
| male   | 7years 4months   | 4898744-4 | PG I | 72.1  |
| male   | 5years 4months   | 715807    | PG I | 65.7  |
| female | 10years 10months | 625862    | PG I | 37.5  |
| male   | 10years 8months  | 716070    | PG I | 44.5  |
| male   | 4years 3months   | 8186394-3 | PG I | 43.4  |
| male   | 7years 6months   | 716124    | PG I | 52.2  |
| female | 12years 8months  | 716150    | PG I | 46.7  |
| male   | 10years 4months  | 716176    | PG I | 57.7  |
| female | 13years 9months  | 716180    | PG I | 64.9  |
| male   | 4years 8months   | 716148    | PG I | 70.6  |
| female | 2months 7days    | 715854    | PG I | 29.4  |
| female | 10years          | 716200    | PG I | 71.2  |
| female | 6months 11days   | 715872    | PG I | 39.8  |
| male   | 7years 1months   | 716409    | PG I | 268.4 |
| male   | 6years 6months   | 716404    | PG I | 47.5  |
| female | 11years 11months | 716419    | PG I | 45.0  |
| male   | 6years 9months   | 716411    | PG I | 67.9  |
| male   | 9years 10months  | 715895    | PG I | 90.2  |
| female | 3years 5months   | 8196849-3 | PG I | 27.8  |
| male   | 13years 2months  | 696017    | PG I | 63.3  |
| male   | 8years 11months  | 715912    | PG I | 175.5 |
| male   | 11years 11months | 716460    | PG I | 53.4  |
| female | 11years 11months | 716516    | PG I | 74.2  |
| female | 10years          | 717790    | PG I | 64.6  |
| male   | 8years           | 716575    | PG I | 72.2  |
| male   | 9years 9months   | 717765    | PG I | 138.1 |
| male   | 12years 4months  | 717715    | PG I | 85.6  |
| male   | 9years 6months   | 716535    | PG I | 76.7  |
| male   | 10years 2months  | 613149    | PG I | 58.1  |
| male   | 2years 8months   | 7276330-3 | PG I | 37.5  |
| male   | 9years 6months   | 715999    | PG I | 44.5  |
| female | 7years 7months   | 717649    | PG I | 44.0  |

|        |                  |           |      |       |
|--------|------------------|-----------|------|-------|
| male   | 10years 11months | 717672    | PG I | 83.4  |
| female | 6years 10months  | 717685    | PG I | 21.4  |
| female | 12years 2months  | 716802    | PG I | 64.5  |
| female | 7years           | 717432    | PG I | 25.4  |
| male   | 10years 7months  | 716871    | PG I | 48.0  |
| male   | 11years 10months | 698682    | PG I | 34.9  |
| male   | 2years 6months   | 640899    | PG I | 20.8  |
| male   | 7years 11months  | 717534    | PG I | 50.7  |
| male   | 7years 4months   | 717517    | PG I | 62.5  |
| female | 3years 3months   | 717543    | PG I | 49.3  |
| male   | 12years 11months | 294356    | PG I | 43.0  |
| female | 10years 3months  | 716963    | PG I | 133.4 |
| female | 8years 5months   | 716952    | PG I | 59.3  |
| male   | 9years 11months  | 716962    | PG I | 66.5  |
| female | 5years 8months   | 716977    | PG I | 52.1  |
| male   | 15years          | 4387581-2 | PG I | 39.3  |
| female | 13years 9months  | 718159    | PG I | 25.1  |
| female | 7years 10months  | 652867    | PG I | 37.8  |
| female | 5years           | 6527866-3 | PG I | 36.8  |
| male   | 5years 1months   | 717814    | PG I | 34.8  |
| female | 8years 8months   | 717296    | PG I | 51.3  |
| female | 2years 8months   | 7463603-3 | PG I | 25.6  |
| male   | 4years 2months   | 718751    | PG I | 46.3  |
| male   | 8years 10months  | 647217    | PG I | 44.6  |
| female | 4years 11months  | 5955434-3 | PG I | 54.4  |
| male   | 3years 9months   | 6475589-4 | PG I | 40.9  |
| male   | 3years 8months   | 7819203-4 | PG I | 50.0  |
| female | 13years 3months  | 717390    | PG I | 32.3  |
| female | 7years 11months  | 718484    | PG I | 61.9  |
| female | 8years 5months   | 718480    | PG I | 142.1 |
| male   | 13years 9months  | 720005    | PG I | 66.5  |
| male   | 9years 4months   | 720749    | PG I | 130.7 |
| female | 6years 9months   | 720736    | PG I | 34.2  |
| female | 4years 10months  | 698175    | PG I | 34.4  |
| male   | 12years 4months  | 309900    | PG I | 202.6 |
| male   | 12years 8months  | 720113    | PG I | 57.9  |
| male   | 10years 7months  | 720139    | PG I | 61.6  |

|        |                 |           |      |       |
|--------|-----------------|-----------|------|-------|
| male   | 7years 1months  | 601355    | PG I | 67.4  |
| male   | 2years 1months  | 7519641-3 | PG I | 68.3  |
| male   | 2years 6months  | 7260329-3 | PG I | 40.5  |
| male   | 6years 6months  | 5824615-4 | PG I | 48.0  |
| male   | 10years         | 719930    | PG I | 48.1  |
| female | 7years 2months  | 442759    | PG I | 158.3 |
| female | 3years 2months  | 8245492-3 | PG I | 50.1  |
| male   | 3years 11months | 720462    | PG I | 36.6  |
| male   | 8years 6months  | 697736    | PG I | 37.0  |
| female | 3years 7months  | 8250774-3 | PG I | 34.1  |
| male   | 2years 8months  | 7961414-4 | PG I | 36.5  |
| male   | 2years 8months  | 7265954-3 | PG I | 162.4 |
| female | 6years 3months  | 473825    | PG I | 50.8  |
| female | 5years 3months  | 719642    | PG I | 131.4 |
| female | 10years 5months | 719655    | PG I | 42.4  |
| male   | 11years 5months | 684093    | PG I | 74.6  |
| female | 7years 7months  | 719209    | PG I | 53.7  |
| male   | 13years 9months | 675811    | PG I | 54.4  |
| male   | 2years 1months  | 721400    | PG I | 36.6  |
| female | 9years 6months  | 721271    | PG I | 44.9  |
| male   | 10years 1months | 6200477-4 | PG I | 54.7  |
| male   | 5years 6months  | 8193419-3 | PG I | 45.4  |
| male   | 7years 7months  | 380090    | PG I | 73.7  |
| female | 5years 9months  | 719796    | PG I | 53.1  |
| male   | 5years 5months  | 722144    | PG I | 51.9  |
| male   | 7years 10months | 691011    | PG I | 32.3  |
| female | 3years 10months | 6573022-4 | PG I | 38.1  |
| male   | 12years 5months | 722138    | PG I | 66.9  |
| male   | 11years 6months | 722387    | PG I | 71.8  |
| male   | 12years 3months | 722363    | PG I | 53.4  |
| female | 7years 10months | 722580    | PG I | 31.5  |
| female | 2years 9months  | 7463603-3 | PG I | 27.6  |
| male   | 12years 9months | 719214    | PG I | 191.7 |
| female | 7years          | 712520    | PG I | 134.2 |
| female | 8years 5months  | 722541    | PG I | 73.2  |

|        |                  |           |      |      |
|--------|------------------|-----------|------|------|
| female | 13years 9months  | 722584    | PG I | 39.4 |
| male   | 13years 6months  | 719215    | PG I | 30.1 |
| female | 9years 5months   | 722668    | PG I | 56.8 |
| male   | 11years 7months  | 721915    | PG I | 63.2 |
| male   | 10months 2days   | 8296689-3 | PG I | 50.5 |
| female | 2years 8months   | 7492633-3 | PG I | 37.8 |
| female | 10years 9months  | 555302    | PG I | 66.6 |
| female | 3years 4months   | 723096    | PG I | 60.9 |
| male   | 2years 1months   | 7680487-3 | PG I | 63.0 |
| female | 12years 11months | 723520    | PG I | 46.7 |
| male   | 11years 8months  | 723139    | PG I | 40.9 |
| male   | 4years 6months   | 532101    | PG I | 37.4 |
| male   | 5years 11months  | 723482    | PG I | 34.9 |
| male   | 11years          | 723142    | PG I | 78.4 |
| female | 4years 11months  | 8289226-3 | PG I | 69.1 |
| male   | 5years 8months   | 8150202-3 | PG I | 38.1 |
| male   | 6years           | 451126    | PG I | 61.8 |
| male   | 3years 10months  | 636827    | PG I | 33.4 |
| female | 3years 11months  | 552562    | PG I | 44.6 |
| male   | 7years 4months   | 724335    | PG I | 77.4 |
| female | 14years          | 553622    | PG I | 41.9 |
| male   | 5years 1months   | 536438    | PG I | 42.4 |
| male   | 3years 3months   | 724374    | PG I | 24.8 |
| male   | 2years 8months   | 7061396-4 | PG I | 44.8 |
| female | 12years 1months  | 190308    | PG I | 49.8 |
| female | 8years 3months   | 716704    | PG I | 38.1 |
| male   | 10years 8months  | 724606    | PG I | 54.8 |
| female | 3years 4months   | 724665    | PG I | 37.1 |
| female | 12years 10months | 724685    | PG I | 84.6 |
| male   | 1years 8months   | 724694    | PG I | 52.5 |
| female | 12years 1months  | 191258    | PG I | 55.8 |
| male   | 9years 6months   | 725135    | PG I | 53.1 |
| male   | 10years          | 7826142-3 | PG I | 64.3 |
| female | 9years 9months   | 725396    | PG I | 35.3 |
| female | 5years 9months   | 725510    | PG I | 39.2 |
| male   | 4years 6months   | 6429528-4 | PG I | 81.5 |
| male   | 7years 4months   | 725674    | PG I | 58.0 |
| male   | 3years 6months   | 725684    | PG I | 66.6 |

|        |                 |           |      |       |
|--------|-----------------|-----------|------|-------|
| female | 5years 9months  | 725951    | PG I | 67.6  |
| male   | 12years 8months | 725947    | PG I | 47.1  |
| male   | 2years 1months  | 725762    | PG I | 38.0  |
| male   | 2years          | 7817380-3 | PG I | 61.6  |
| male   | 6years 2months  | 725767    | PG I | 27.2  |
| male   | 5years 3months  | 725996    | PG I | 76.0  |
| female | 10years 2months | 726222    | PG I | 34.2  |
| male   | 6years          | 726208    | PG I | 52.6  |
| male   | 3years 1months  | 726207    | PG I | 38.0  |
| male   | 5years 10months | 726673    | PG I | 42.8  |
| male   | 8years 5months  | 727098    | PG I | 29.9  |
| male   | 10years 9months | 727199    | PG I | 44.1  |
| female | 11years 1months | 726836    | PG I | 331.7 |
| male   | 7years 9months  | 726835    | PG I | 297.4 |
| female | 10years 6months | 362924    | PG I | 43.0  |
| male   | 7years          | 4653172-2 | PG I | 31.6  |
| female | 9months 27days  | 8373376-3 | PG I | 46.8  |
| male   | 9years 3months  | 727223    | PG I | 38.7  |
| female | 3years 2months  | 726867    | PG I | 44.6  |
| male   | 8years 3months  | 727590    | PG I | 70.1  |
| female | 3years 4months  | 8245492-3 | PG I | 52.6  |
| male   | 9years 7months  | 727325    | PG I | 53.6  |
| male   | 3years 8months  | 7128005-2 | PG I | 28.2  |
| male   | 8years 8months  | 388791    | PG I | 55.3  |
| female | 3years 4months  | 727747    | PG I | 53.6  |
| male   | 5years 4months  | 727784    | PG I | 36.8  |
| female | 1years 11months | 8075811-4 | PG I | 41.0  |
| male   | 3months 5days   | 8384623-3 | PG I | 37.7  |
| male   | 13years 5months | 727436    | PG I | 63.7  |
| male   | 1months 10days  | 728146    | PG I | 16.0  |
| female | 9years 1months  | 728173    | PG I | 35.5  |
| female | 8years 2months  | 728163    | PG I | 55.7  |
| male   | 15years         | 728150    | PG I | 58.1  |
| female | 13years 8months | 728227    | PG I | 86.9  |
| female | 4years 7months  | 714058    | PG I | 106.5 |
| female | 13years 4months | 728309    | PG I | 65.3  |
| male   | 7years 9months  | 727884    | PG I | 50.7  |
| female | 7years          | 728905    | PG I | 41.9  |
| female | 10years 9months | 728907    | PG I | 50.3  |

|        |                  |           |      |       |
|--------|------------------|-----------|------|-------|
| male   | 7years 10months  | 728843    | PG I | 73.1  |
| male   | 9years 7months   | 728840    | PG I | 53.5  |
| male   | 5years           | 729286    | PG I | 65.4  |
| male   | 1years 7months   | 728889    | PG I | 75.1  |
| male   | 7years 6months   | 727465    | PG I | 61.6  |
| female | 9years           | 651644    | PG I | 72.6  |
| female | 9years 2months   | 729062    | PG I | 42.4  |
| male   | 12years 7months  | 729493    | PG I | 88.8  |
| male   | 12years 11months | 656823    | PG I | 76.8  |
| male   | 12years 6months  | 728451    | PG I | 106.4 |
| male   | 8years 11months  | 728436    | PG I | 34.2  |
| female | 11years          | 728420    | PG I | 39.0  |
| female | 10years 6months  | 691969    | PG I | 93.2  |
| female | 2years 10months  | 7912616-3 | PG I | 33.2  |
| female | 8years 10months  | 728520    | PG I | 81.5  |
| female | 6years 7months   | 596651    | PG I | 53.4  |
| male   | 6years 8months   | 729537    | PG I | 44.1  |
| male   | 10years 3months  | 719930    | PG I | 52.7  |
| male   | 7years 9months   | 707330    | PG I | 62.5  |
| male   | 6years 8months   | 729565    | PG I | 149.9 |
| male   | 13years          | 728619    | PG I | 235.4 |
| male   | 5years 4months   | 728697    | PG I | 57.2  |
| male   | 15years          | 728742    | PG I | 31.7  |
| female | 13years 6months  | 728758    | PG I | 42.6  |
| male   | 12years 9months  | 728721    | PG I | 42.1  |
| male   | 2years 5months   | 8406053-3 | PG I | 50.7  |
| female | 1years 10months  | 7599769-3 | PG I | 38.0  |
| male   | 3months 10days   | 721024    | PG I | 21.6  |
| female | 8months          | 8034739-2 | PG I | 43.8  |
| male   | 12years 9months  | 729654    | PG I | 35.9  |
| male   | 13years 10months | 729823    | PG I | 38.2  |
| female | 10years          | 729810    | PG I | 49.1  |
| male   | 10years 11months | 729880    | PG I | 75.8  |
| male   | 9years 9months   | 729879    | PG I | 90.4  |
| female | 1years 10months  | 7599769-3 | PG I | 37.0  |
| male   | 10years          | 729882    | PG I | 106.9 |
| male   | 6years 6months   | 729856    | PG I | 41.4  |

|        |                  |           |      |       |
|--------|------------------|-----------|------|-------|
| female | 6years 4months   | 6872972-4 | PG I | 35.8  |
| female | 13years 3months  | 730049    | PG I | 71.5  |
| female | 8years 10months  | 729736    | PG I | 46.5  |
| female | 11years 11months | 729959    | PG I | 38.9  |
| male   | 6years 9months   | 729724    | PG I | 72.4  |
| female | 5years 8months   | 729731    | PG I | 42.7  |
| male   | 9years 3months   | 721651    | PG I | 77.1  |
| male   | 10years 2months  | 390956    | PG I | 56.8  |
| male   | 9years 3months   | 730065    | PG I | 74.4  |
| female | 6years 9months   | 730196    | PG I | 32.3  |
| female | 6years 10months  | 624668    | PG I | 57.0  |
| male   | 8years 1months   | 8421631-3 | PG I | 43.6  |
| female | 5years 8months   | 730593    | PG I | 60.1  |
| female | 13years 9months  | 730235    | PG I | 53.9  |
| male   | 3years 5months   | 8312992-3 | PG I | 48.3  |
| male   | 1years 6months   | 7646202-4 | PG I | 56.0  |
| female | 4years 2months   | 730258    | PG I | 40.7  |
| male   | 13years 4months  | 8433502-3 | PG I | 86.5  |
| male   | 11years 2months  | 730771    | PG I | 52.4  |
| male   | 1years 11months  | 7623734-3 | PG I | 39.3  |
| female | 1years 2months   | 8394720-3 | PG I | 44.6  |
| male   | 6years 7months   | 494659    | PG I | 241.7 |
| female | 7years 10months  | 730957    | PG I | 73.3  |
| male   | 8years 5months   | 730311    | PG I | 44.1  |
| female | 13years 10months | 730327    | PG I | 49.2  |
| female | 9years 11months  | 731065    | PG I | 47.0  |
| female | 11years 9months  | 730336    | PG I | 85.0  |
| male   | 14years          | 730342    | PG I | 55.1  |
| female | 6years 2months   | 8418291-3 | PG I | 48.4  |
| male   | 5years 11months  | 6697958-3 | PG I | 46.3  |
| female | 12years 10months | 7189014-4 | PG I | 47.5  |
| male   | 9years 10months  | 731092    | PG I | 67.3  |



|        |                  |           |      |       |
|--------|------------------|-----------|------|-------|
| male   | 11years 2months  | 8434477-3 | PG I | 51.9  |
| male   | 2years 5months   | 7420070-3 | PG I | 38.8  |
| female | 11years 6months  | 658313    | PG I | 47.6  |
| male   | 6years 5months   | 731237    | PG I | 54.6  |
| male   | 8years 10months  | 731175    | PG I | 44.6  |
| female | 6years 11months  | 731172    | PG I | 39.4  |
| male   | 10years 10months | 252827    | PG I | 65.7  |
| male   | 8years 8months   | 731674    | PG I | 239.6 |
| male   | 7years 2months   | 731676    | PG I | 42.4  |
| male   | 10months 23days  | 7991515-4 | PG I | 69.3  |
| male   | 1years 11months  | 731690    | PG I | 33.6  |
| female | 8years 5months   | 602551    | PG I | 32.3  |
| male   | 6months 28days   | 707191    | PG I | 65.7  |
| male   | 10years 9months  | 731683    | PG I | 54.7  |
| male   | 1years 5months   | 7855707-3 | PG I | 53.2  |
| male   | 11years 11months | 731471    | PG I | 144.1 |
| female | 3years 5months   | 7264330-3 | PG I | 20.0  |
| female | 12years 8months  | 731845    | PG I | 75.5  |
| male   | 10years 1months  | 576654    | PG I | 61.5  |
| male   | 13years 11months | 707320    | PG I | 35.1  |
| male   | 11years 6months  | 731822    | PG I | 49.0  |
| female | 5years 9months   | 658542    | PG I | 60.8  |
| male   | 8years 1months   | 731193    | PG I | 97.4  |
| male   | 12years 11months | 8179946-3 | PG I | 51.4  |
| female | 4years 2months   | 649987    | PG I | 40.4  |
| female | 10years          | 731542    | PG I | 49.8  |
| female | 15years          | 731536    | PG I | 51.5  |
| male   | 4years 1months   | 731205    | PG I | 67.7  |
| female | 12years 8months  | 8445510-3 | PG I | 54.1  |

|        |                  |           |      |       |
|--------|------------------|-----------|------|-------|
| male   | 6years 6months   | 498160    | PG I | 31.2  |
| male   | 5years 1months   | 6941026-3 | PG I | 56.7  |
| female | 10years 10months | 731579    | PG I | 49.2  |
| male   | 15years          | 732015    | PG I | 76.5  |
| male   | 10years 9months  | 732048    | PG I | 103.1 |
| male   | 5years 2months   | 732056    | PG I | 42.0  |
| female | 7years 1months   | 707313    | PG I | 37.1  |
| male   | 4years 8months   | 7487699-3 | PG I | 42.6  |
| male   | 1years 9months   | 7637653-3 | PG I | 45.3  |
| male   | 7years 11months  | 732524    | PG I | 45.0  |
| female | 12years 8months  | 732590    | PG I | 59.3  |
| male   | 2years 1months   | 7799240-3 | PG I | 40.1  |
| female | 3years 3months   | 6931288-4 | PG I | 43.6  |
| male   | 15years          | 343771    | PG I | 128.9 |
| male   | 5years 4months   | 732143    | PG I | 44.1  |
| male   | 1years 8months   | 7726108-3 | PG I | 36.9  |
| male   | 10months 4days   | 8048694-3 | PG I | 29.3  |
| female | 7years 7months   | 732781    | PG I | 52.5  |
| female | 8years 3months   | 732783    | PG I | 64.9  |
| female | 4years 11months  | 6200051-4 | PG I | 25.6  |
| male   | 5years 11months  | 7694017-4 | PG I | 40.8  |
| female | 11months 2days   | 8183151-3 | PG I | 44.2  |
| female | 4years 7months   | 8460514-3 | PG I | 39.2  |
| male   | 1years 9months   | 8455388-3 | PG I | 50.4  |
| female | 1years 4months   | 7873322-3 | PG I | 50.3  |
| female | 5years 10months  | 8459555-3 | PG I | 53.2  |
| male   | 9years 1months   | 732837    | PG I | 47.2  |
| male   | 10years 3months  | 732197    | PG I | 39.8  |
| male   | 5months 19days   | 732847    | PG I | 15.9  |
| male   | 4years 5months   | 733019    | PG I | 51.7  |
| female | 9years 3months   | 732885    | PG I | 102.7 |
| female | 11years          | 732921    | PG I | 47.3  |
| male   | 8years 11months  | 733026    | PG I | 44.8  |
| female | 10years 3months  | 4695509-4 | PG I | 38.1  |
| female | 7years 3months   | 6876049-4 | PG I | 57.5  |

|        |                  |           |      |       |
|--------|------------------|-----------|------|-------|
| male   | 7years 2months   | 732993    | PG I | 51.6  |
| female | 10years 9months  | 733743    | PG I | 74.4  |
| female | 6years 5months   | 733063    | PG I | 56.5  |
| female | 6years 2months   | 733710    | PG I | 44.3  |
| male   | 8years 6months   | 7187533-4 | PG I | 37.9  |
| male   | 6years 8months   | 8456017-3 | PG I | 57.3  |
| female | 2years 1months   | 8426004-3 | PG I | 39.4  |
| male   | 5years 7months   | 5841341-4 | PG I | 41.5  |
| female | 5years 3months   | 6472410-4 | PG I | 33.1  |
| female | 9years 11months  | 7937771-3 | PG I | 44.8  |
| female | 6years 5months   | 5832976-4 | PG I | 38.9  |
| female | 4years           | 733661    | PG I | 57.2  |
| male   | 8years 11months  | 733098    | PG I | 305.5 |
| male   | 8years 8months   | 733784    | PG I | 33.8  |
| male   | 9years 4months   | 733114    | PG I | 77.7  |
| female | 1months 25days   | 733621    | PG I | 22.4  |
| male   | 10years 4months  | 734069    | PG I | 62.2  |
| male   | 13years          | 734063    | PG I | 36.7  |
| female | 12years 11months | 734048    | PG I | 52.3  |
| male   | 12years 6months  | 733674    | PG I | 52.0  |
| female | 4years 6months   | 8088411-3 | PG I | 50.6  |
| male   | 7months 5days    | 8418143-3 | PG I | 38.4  |
| female | 4years 11months  | 6542937-3 | PG I | 53.9  |
| female | 9years 10months  | 731489    | PG I | 41.1  |
| female | 4years 4months   | 585144    | PG I | 22.6  |
| male   | 7years 5months   | 606132    | PG I | 42.9  |
| male   | 10years 7months  | 734217    | PG I | 91.0  |
| female | 7years 7months   | 734244    | PG I | 46.0  |
| female | 6years 8months   | 733841    | PG I | 22.2  |
| female | 6years           | 5294162-4 | PG I | 56.9  |
| male   | 5years 8months   | 733889    | PG I | 38.4  |
| female | 9years 4months   | 734336    | PG I | 39.9  |
| female | 12years 9months  | 8445510-3 | PG I | 135.1 |
| male   | 12years 9months  | 734363    | PG I | 104.2 |

|        |                  |           |      |       |
|--------|------------------|-----------|------|-------|
| male   | 9years 3months   | 702607    | PG I | 47.8  |
| male   | 3years 9months   | 575069    | PG I | 38.1  |
| male   | 7years 10months  | 734482    | PG I | 37.5  |
| male   | 2years 8months   | 733916    | PG I | 146.7 |
| female | 10months 8days   | 8476209-3 | PG I | 39.2  |
| male   | 5years 2months   | 6501135-3 | PG I | 24.1  |
| male   | 6months 2days    | 8308766-3 | PG I | 32.8  |
| female | 2years 6months   | 7391971-4 | PG I | 40.1  |
| male   | 10years 6months  | 734647    | PG I | 60.1  |
| male   | 4years 6months   | 733951    | PG I | 34.8  |
| female | 5years 3months   | 734656    | PG I | 36.2  |
| male   | 12years 11months | 734637    | PG I | 115.3 |
| male   | 2years 1months   | 8480386-3 | PG I | 38.4  |
| male   | 7years 11months  | 707330    | PG I | 209.1 |
| female | 11years 8months  | 734764    | PG I | 35.3  |
| male   | 12years 5months  | 478812    | PG I | 64.1  |
| male   | 2years 4months   | 733985    | PG I | 64.6  |
| male   | 12years 1months  | 735006    | PG I | 119.3 |
| male   | 8years 7months   | 735027    | PG I | 35.6  |
| female | 6years 6months   | 735044    | PG I | 29.3  |
| female | 6years 10months  | 735048    | PG I | 90.1  |
| male   | 11years          | 480839    | PG I | 44.3  |
| male   | 8years 5months   | 734590    | PG I | 307.7 |
| female | 15years          | 728809    | PG I | 51.7  |
| male   | 8years 11months  | 735116    | PG I | 49.3  |
| male   | 3years 8months   | 733139    | PG I | 35.8  |
| male   | 11years 5months  | 735162    | PG I | 37.1  |
| male   | 9years 7months   | 735135    | PG I | 65.1  |
| male   | 10years 5months  | 735071    | PG I | 50.8  |

|        |                  |           |      |       |
|--------|------------------|-----------|------|-------|
| female | 4years           | 6597952-4 | PG I | 34.0  |
| male   | 5years 5months   | 8486502-3 | PG I | 51.7  |
| male   | 5years 5months   | 6752056-3 | PG I | 37.1  |
| male   | 8years 5months   | 734590    | PG I | 138.5 |
| female | 10years 1months  | 6742204-4 | PG I | 69.1  |
| male   | 8years 11months  | 735202    | PG I | 56.4  |
| female | 7years 5months   | 4500735-4 | PG I | 39.6  |
| male   | 10years 10months | 696440    | PG I | 36.5  |
| female | 3years 11months  | 6723721-3 | PG I | 30.7  |
| female | 12years 9months  | 8450518-3 | PG I | 67.4  |
| male   | 2years 4months   | 7500338-3 | PG I | 30.8  |
| male   | 11years 11months | 7314337-4 | PG I | 50.6  |
| male   | 1years 5months   | 7757173-3 | PG I | 25.6  |
| male   | 4years 5months   | 6317689-3 | PG I | 47.7  |
| female | 4years 3months   | 8481407-3 | PG I | 26.1  |
| male   | 8months 13days   | 8484105-4 | PG I | 44.5  |
| female | 9years 5months   | 735331    | PG I | 123.3 |
| male   | 8years 9months   | 485993    | PG I | 116.0 |
| female | 5years 4months   | 5955434-3 | PG I | 35.6  |
| male   | 15years          | 8489704-3 | PG I | 43.3  |
| female | 6years 2months   | 8396749-3 | PG I | 43.4  |
| male   | 3years 3months   | 6976160-4 | PG I | 30.8  |
| male   | 11years 4months  | 6913208-4 | PG I | 54.6  |
| female | 2years 2months   | 7958609-4 | PG I | 47.1  |
| male   | 5years 7months   | 7036522-4 | PG I | 39.2  |
| male   | 9years 11months  | 734930    | PG I | 47.5  |
| male   | 10years 4months  | 735360    | PG I | 45.2  |
| female | 12years 6months  | 565555    | PG I | 24.9  |
| female | 5years 10months  | 735356    | PG I | 44.7  |

|        |                  |           |      |       |
|--------|------------------|-----------|------|-------|
| male   | 7years 6months   | 4758925-4 | PG I | 51.6  |
| male   | 2years           | 8488316-3 | PG I | 47.2  |
| female | 5years 1months   | 734969    | PG I | 29.0  |
| male   | 8years 3months   | 671524    | PG I | 41.7  |
| female | 14years          | 709824    | PG I | 81.7  |
| female | 8years 9months   | 736602    | PG I | 38.2  |
| female | 12years 11months | 735586    | PG I | 46.0  |
| male   | 4years 3months   | 736663    | PG I | 28.2  |
| male   | 13years          | 735633    | PG I | 77.7  |
| female | 11years          | 735628    | PG I | 37.6  |
| male   | 8years 7months   | 735640    | PG I | 27.6  |
| male   | 4years 4months   | 8469850-3 | PG I | 40.9  |
| female | 4years 8months   | 736624    | PG I | 50.5  |
| male   | 1years 11months  | 7700335-3 | PG I | 51.5  |
| female | 9years 10months  | 735717    | PG I | 50.7  |
| female | 6years 3months   | 8393264-3 | PG I | 62.4  |
| female | 9years 1months   | 735725    | PG I | 52.0  |
| female | 7years 8months   | 736671    | PG I | 38.5  |
| male   | 4years 1months   | 7854420-3 | PG I | 27.7  |
| female | 3years 5months   | 7406575-2 | PG I | 34.7  |
| male   | 14years          | 735803    | PG I | 41.1  |
| female | 12years 3months  | 8498295-4 | PG I | 54.3  |
| female | 7years 4months   | 735825    | PG I | 50.1  |
| female | 5years 7months   | 8014305-3 | PG I | 42.2  |
| male   | 3years 11months  | 6902535-3 | PG I | 47.5  |
| female | 2years 7months   | 8111330-3 | PG I | 43.2  |
| male   | 7years 8months   | 453911    | PG I | 23.6  |
| male   | 11years 10months | 735915    | PG I | 187.2 |
| female | 11years 8months  | 735940    | PG I | 78.2  |
| female | 5years           | 736699    | PG I | 59.7  |
| female | 11years 4months  | 736694    | PG I | 32.8  |
| male   | 4years 9months   | 735950    | PG I | 59.3  |

|        |                  |           |      |      |
|--------|------------------|-----------|------|------|
| male   | 4years           | 735853    | PG I | 42.3 |
| female | 5years 7months   | 8130585-3 | PG I | 42.6 |
| male   | 2years 2months   | 8497597-3 | PG I | 39.6 |
| male   | 2years 1months   | 8027591-3 | PG I | 49.5 |
| female | 5years 6months   | 6088101-4 | PG I | 40.2 |
| male   | 5months 6days    | 8460775-3 | PG I | 34.3 |
| male   | 10months 16days  | 7993048-4 | PG I | 33.9 |
| female | 5years 5months   | 736021    | PG I | 43.0 |
| male   | 5years 6months   | 735997    | PG I | 58.8 |
| male   | 4years 2months   | 736055    | PG I | 45.2 |
| female | 5years 6months   | 736051    | PG I | 39.7 |
| female | 8years 1months   | 736722    | PG I | 32.1 |
| female | 5years 7months   | 7883401-3 | PG I | 44.9 |
| female | 2years 3months   | 7530394-4 | PG I | 36.5 |
| female | 13years 10months | 736131    | PG I | 60.1 |
| male   | 11years 11months | 736134    | PG I | 90.1 |
| male   | 9years 4months   | 432226    | PG I | 33.6 |
| female | 9years 5months   | 694899    | PG I | 43.1 |
| male   | 10years 6months  | 736125    | PG I | 46.3 |
| male   | 3years 9months   | 690876    | PG I | 83.1 |
| female | 10years 6months  | 736156    | PG I | 25.9 |
| male   | 9years 2months   | 736179    | PG I | 68.8 |
| male   | 12years          | 736177    | PG I | 39.7 |
| female | 10years 8months  | 736367    | PG I | 36.6 |
| male   | 8years 8months   | 736264    | PG I | 50.6 |
| female | 12years 7months  | 565555    | PG I | 51.4 |
| male   | 2years 2months   | 7564282-3 | PG I | 39.6 |
| female | 10years 9months  | 736344    | PG I | 63.2 |
| female | 3years 9months   | 575086    | PG I | 53.3 |
| male   | 3years 8months   | 736243    | PG I | 61.0 |
| male   | 11years 3months  | 736287    | PG I | 62.2 |
| male   | 1years 5months   | 7816190-3 | PG I | 34.4 |
| male   | 10years 3months  | 736396    | PG I | 40.7 |
| male   | 8years 4months   | 697483    | PG I | 43.8 |
| female | 7years 11months  | 737023    | PG I | 44.8 |
| male   | 3years 3months   | 8228576-3 | PG I | 42.0 |

|        |                  |           |      |       |
|--------|------------------|-----------|------|-------|
| male   | 11years          | 736443    | PG I | 45.1  |
| male   | 8years 9months   | 737083    | PG I | 46.7  |
| male   | 10years 1months  | 291093    | PG I | 54.2  |
| male   | 8years 7months   | 737087    | PG I | 38.4  |
| female | 5years 4months   | 651754    | PG I | 46.0  |
| male   | 10years 4months  | 573721    | PG I | 61.9  |
| male   | 7years 1months   | 5999584-3 | PG I | 58.0  |
| male   | 1years 5months   | 7809233-3 | PG I | 35.7  |
| male   | 10years          | 737204    | PG I | 271.2 |
| female | 14years          | 737220    | PG I | 30.5  |
| male   | 7years 3months   | 418580    | PG I | 46.7  |
| female | 3months 18days   | 737251    | PG I | 17.7  |
| female | 11years 8months  | 8506663-3 | PG I | 31.9  |
| male   | 12years 7months  | 737435    | PG I | 82.6  |
| male   | 9years 9months   | 737357    | PG I | 51.8  |
| male   | 10years 10months | 737376    | PG I | 58.2  |
| male   | 9years 9months   | 737438    | PG I | 135.8 |
| male   | 4years           | 736539    | PG I | 41.6  |
| male   | 10years          | 737486    | PG I | 38.0  |
| male   | 7years 10months  | 737479    | PG I | 46.1  |
| female | 7years 1months   | 737491    | PG I | 53.9  |
| male   | 5years 2months   | 737499    | PG I | 40.8  |
| male   | 4years 4months   | 736506    | PG I | 51.8  |
| male   | 7years 4months   | 737474    | PG I | 22.3  |
| male   | 9years 8months   | 513246    | PG I | 57.4  |
| female | 15years          | 656848    | PG I | 49.2  |
| female | 11years 6months  | 437867    | PG I | 44.4  |
| male   | 1years 7months   | 8002534-3 | PG I | 42.1  |
| female | 15years          | 736898    | PG I | 51.8  |
| male   | 5years 1months   | 736822    | PG I | 39.4  |
| female | 14years          | 737627    | PG I | 61.9  |
| male   | 9years 9months   | 704315    | PG I | 49.7  |



|        |                  |           |      |       |
|--------|------------------|-----------|------|-------|
| male   | 7years 3months   | 7340966-4 | PG I | 54.0  |
| male   | 1years 7months   | 8422909-3 | PG I | 33.1  |
| female | 4years 11months  | 8253258-3 | PG I | 43.0  |
| male   | 10years 10months | 737743    | PG I | 42.2  |
| male   | 11years 9months  | 737638    | PG I | 171.6 |
| male   | 10years 8months  | 737766    | PG I | 44.0  |
| male   | 3years 2months   | 7657166-3 | PG I | 25.8  |
| male   | 2years 1months   | 8079167-3 | PG I | 36.2  |
| male   | 9years 1months   | 738283    | PG I | 78.1  |
| female | 12years          | 737642    | PG I | 42.7  |
| male   | 9years 11months  | 593589    | PG I | 42.1  |
| male   | 8years 4months   | 738281    | PG I | 80.2  |
| male   | 6years 11months  | 738273    | PG I | 35.2  |
| female | 5years 9months   | 738357    | PG I | 33.9  |
| male   | 5years           | 738317    | PG I | 36.7  |
| female | 7years 4months   | 738340    | PG I | 36.0  |
| male   | 7years           | 8252647-3 | PG I | 121.2 |
| male   | 1years 11months  | 8484247-3 | PG I | 60.8  |
| male   | 1years 9months   | 8099745-3 | PG I | 45.4  |
| female | 1years 5months   | 7887432-3 | PG I | 43.8  |
| male   | 1years           | 738392    | PG I | 47.0  |
| male   | 9years 8months   | 685471    | PG I | 309.3 |
| male   | 1years 9months   | 738051    | PG I | 124.0 |
| female | 6years 4months   | 5912675-3 | PG I | 37.2  |
| male   | 7years 6months   | 733900    | PG I | 47.8  |
| female | 1years 5months   | 738138    | PG I | 28.7  |
| female | 11months 13days  | 8524726-3 | PG I | 46.0  |
| female | 2years 9months   | 7827089-3 | PG I | 37.5  |
| male   | 8years 9months   | 738453    | PG I | 96.9  |
| male   | 6years 8months   | 5673322-4 | PG I | 50.7  |

|        |                  |           |      |       |
|--------|------------------|-----------|------|-------|
| male   | 3years 5months   | 8527333-3 | PG I | 39.1  |
| male   | 10years 7months  | 738519    | PG I | 35.7  |
| female | 9years 6months   | 8377981-3 | PG I | 119.3 |
| male   | 10years 1months  | 738808    | PG I | 41.9  |
| male   | 10years          | 738517    | PG I | 40.7  |
| female | 4years 10months  | 737948    | PG I | 33.3  |
| male   | 11years 8months  | 287417    | PG I | 68.1  |
| female | 4years           | 566186    | PG I | 31.6  |
| female | 10years 11months | 737919    | PG I | 63.8  |
| female | 9years 8months   | 699561    | PG I | 64.8  |
| male   | 5years 3months   | 8484577-3 | PG I | 36.2  |
| male   | 6years 10months  | 738628    | PG I | 42.7  |
| male   | 8years 1months   | 737996    | PG I | 80.9  |
| female | 5years 4months   | 8539935-3 | PG I | 37.9  |
| male   | 3years 11months  | 7208827-3 | PG I | 42.9  |
| female | 7years 10months  | 4890630-4 | PG I | 33.4  |
| male   | 1years           | 696058    | PG I | 54.2  |
| female | 1years 11months  | 7664077-3 | PG I | 41.7  |
| female | 4years           | 739552    | PG I | 23.4  |
| female | 8years 7months   | 739505    | PG I | 82.6  |
| female | 11years 2months  | 739485    | PG I | 52.7  |
| male   | 4years 10months  | 739487    | PG I | 51.7  |
| female | 13years 4months  | 519441    | PG I | 89.6  |
| male   | 1years           | 8064035-3 | PG I | 40.7  |
| male   | 1years           | 8070611-3 | PG I | 32.8  |
| male   | 10years 7months  | 739629    | PG I | 48.3  |
| male   | 10years 9months  | 738741    | PG I | 49.6  |
| male   | 3years 2months   | 739663    | PG I | 111.8 |
| male   | 1years 1months   | 8542347-3 | PG I | 40.5  |
| female | 1years 6months   | 8461780-3 | PG I | 40.5  |
| female | 5years 2months   | 8549086-3 | PG I | 30.9  |

|        |                 |           |      |       |
|--------|-----------------|-----------|------|-------|
| male   | 11years 3months | 738796    | PG I | 165.3 |
| male   | 6years 8months  | 681046    | PG I | 118.7 |
| male   | 9years 1months  | 739763    | PG I | 191.0 |
| male   | 1years 6months  | 7844749-3 | PG I | 27.1  |
| female | 3years 10months | 7061283-3 | PG I | 34.2  |
| female | 4years 2months  | 739832    | PG I | 37.7  |
| male   | 4years 3months  | 8176924-4 | PG I | 39.2  |
| male   | 5years 9months  | 740018    | PG I | 36.3  |
| male   | 1years 5months  | 7857562-3 | PG I | 51.8  |
| male   | 2years 1months  | 7669455-3 | PG I | 31.8  |
| male   | 3years 5months  | 6996721-4 | PG I | 33.8  |
| female | 8years 3months  | 739840    | PG I | 99.7  |
| male   | 12years 9months | 739860    | PG I | 91.7  |
| male   | 5years          | 687670    | PG I | 32.0  |
| male   | 9years 9months  | 740028    | PG I | 59.1  |
| male   | 13years 8months | 739883    | PG I | 127.8 |
| male   | 2years 11months | 699979    | PG I | 33.6  |
| female | 3years 6months  | 740128    | PG I | 40.6  |
| female | 9years 6months  | 740095    | PG I | 50.4  |
| male   | 9years 9months  | 739917    | PG I | 38.2  |
| female | 4years 10months | 740256    | PG I | 49.6  |
| male   | 8years 11months | 740263    | PG I | 81.6  |
| male   | 1years 8months  | 8002534-3 | PG I | 40.6  |
| female | 2years 1months  | 7826198-3 | PG I | 42.6  |
| male   | 8years 10months | 740368    | PG I | 42.3  |
| male   | 8years 5months  | 740318    | PG I | 40.2  |
| female | 5years 8months  | 740348    | PG I | 32.9  |
| female | 4years 6months  | 8481743-3 | PG I | 35.2  |
| female | 8years 2months  | 372345    | PG I | 100.7 |
| female | 6years 9months  | 740428    | PG I | 52.2  |
| male   | 11years 9months | 739969    | PG I | 157.5 |
| female | 11years 3months | 555302    | PG I | 63.0  |
| male   | 10years 3months | 740533    | PG I | 41.6  |
| male   | 11years 9months | 740517    | PG I | 319.2 |
| male   | 1years 3months  | 740463    | PG I | 27.2  |
| female | 10years 8months | 740581    | PG I | 56.1  |
| male   | 10years 6months | 716969    | PG I | 176.6 |
| male   | 5years          | 714459    | PG I | 33.7  |
| male   | 7years 2months  | 8386167-2 | PG I | 34.2  |
| female | 2years          | 8397473-3 | PG I | 27.2  |

|        |                  |           |      |       |
|--------|------------------|-----------|------|-------|
| male   | 4years 8months   | 740607    | PG I | 35.6  |
| male   | 3years           | 7528499-3 | PG I | 30.4  |
| male   | 5years 3months   | 530024    | PG I | 29.3  |
| female | 4years 5months   | 740781    | PG I | 43.7  |
| female | 9years 8months   | 740782    | PG I | 35.7  |
| male   | 8years 9months   | 740830    | PG I | 32.1  |
| female | 10years 1months  | 318909    | PG I | 34.0  |
| female | 8years 10months  | 6923614-4 | PG I | 41.9  |
| male   | 4years 7months   | 6310951-2 | PG I | 42.2  |
| female | 2years 10months  | 8151430-3 | PG I | 32.3  |
| male   | 7years 3months   | 740928    | PG I | 58.1  |
| male   | 7years 10months  | 445834    | PG I | 58.7  |
| male   | 9years 6months   | 739990    | PG I | 34.5  |
| female | 11years 9months  | 741476    | PG I | 141.7 |
| female | 4years 5months   | 8562509-3 | PG I | 31.1  |
| female | 10years 2months  | 8563456-3 | PG I | 48.8  |
| male   | 8years 5months   | 8566119-4 | PG I | 45.2  |
| male   | 3years           | 7157809-2 | PG I | 82.9  |
| female | 2years 7months   | 8562491-3 | PG I | 30.8  |
| male   | 8years 1months   | 7317065-3 | PG I | 37.6  |
| female | 2years           | 8483891-3 | PG I | 66.1  |
| male   | 11years 4months  | 741012    | PG I | 85.4  |
| female | 8years 10months  | 740623    | PG I | 32.3  |
| male   | 3years 2months   | 7905171-3 | PG I | 38.1  |
| male   | 12years 10months | 5807995-3 | PG I | 40.5  |
| female | 5years 3months   | 7549931-3 | PG I | 37.1  |
| male   | 11years 10months | 741528    | PG I | 53.3  |
| female | 11years 2months  | 741098    | PG I | 42.6  |
| male   | 10years 4months  | 741120    | PG I | 68.3  |
| male   | 6years 10months  | 451260    | PG I | 80.8  |
| male   | 1years 6months   | 7928194-3 | PG I | 50.1  |
| male   | 7years 3months   | 7935946-3 | PG I | 37.2  |
| male   | 3years 1months   | 8066108-3 | PG I | 28.0  |

|        |                  |           |      |       |
|--------|------------------|-----------|------|-------|
| female | 9years 11months  | 7606822-3 | PG I | 35.1  |
| male   | 6years 3months   | 615850    | PG I | 39.6  |
| female | 11years 4months  | 741153    | PG I | 96.2  |
| female | 6years 3months   | 741604    | PG I | 74.0  |
| male   | 9years 2months   | 4684142-4 | PG I | 58.8  |
| male   | 5years 3months   | 8539342-3 | PG I | 41.9  |
| male   | 15years          | 6349450-4 | PG I | 69.5  |
| male   | 13years 5months  | 3425684-4 | PG I | 52.7  |
| male   | 7years 8months   | 7269704-4 | PG I | 39.6  |
| male   | 10years 6months  | 8571456-4 | PG I | 45.0  |
| male   | 2years 5months   | 8564437-3 | PG I | 36.5  |
| male   | 10years 1months  | 8570761-3 | PG I | 48.1  |
| female | 13years 8months  | 7216644-4 | PG I | 48.8  |
| female | 2years 3months   | 7806898-3 | PG I | 32.2  |
| male   | 12years 11months | 8355854-3 | PG I | 43.7  |
| female | 1years 11months  | 741804    | PG I | 44.8  |
| male   | 13years 10months | 741599    | PG I | 42.3  |
| male   | 4years 7months   | 741211    | PG I | 43.7  |
| male   | 10years 4months  | 741812    | PG I | 33.8  |
| male   | 9years 5months   | 320132    | PG I | 62.7  |
| male   | 8years 2months   | 5875206-3 | PG I | 43.1  |
| female | 6years 1months   | 741201    | PG I | 68.0  |
| female | 9years 3months   | 7706671-3 | PG I | 29.5  |
| female | 7years 11months  | 5716282-4 | PG I | 40.1  |
| male   | 4years 6months   | 6752916-3 | PG I | 41.1  |
| male   | 8years 3months   | 8566786-3 | PG I | 19.3  |
| female | 1years 6months   | 8572705-3 | PG I | 40.1  |
| male   | 10years 1months  | 737204    | PG I | 263.4 |
| male   | 1years           | 8071229-3 | PG I | 49.7  |
| male   | 10years 6months  | 741915    | PG I | 27.5  |
| male   | 1years 10months  | 8234743-3 | PG I | 46.9  |
| male   | 7years 5months   | 7061771-4 | PG I | 37.2  |
| female | 5years 6months   | 7853104-3 | PG I | 38.3  |
| female | 9years 8months   | 8038114-3 | PG I | 43.4  |

|        |                  |           |      |       |
|--------|------------------|-----------|------|-------|
| male   | 12years 4months  | 4460404-4 | PG I | 70.3  |
| female | 6years 10months  | 5814599-3 | PG I | 39.9  |
| female | 9months 22days   | 8393940-3 | PG I | 35.2  |
| female | 10years 9months  | 741953    | PG I | 43.0  |
| female | 9years 11months  | 741975    | PG I | 62.0  |
| male   | 6years 10months  | 741989    | PG I | 37.6  |
| female | 9years 2months   | 741986    | PG I | 34.0  |
| female | 6years 5months   | 5317772-4 | PG I | 35.5  |
| male   | 5years 10months  | 5807527-4 | PG I | 38.7  |
| male   | 2years 2months   | 7623734-3 | PG I | 38.5  |
| female | 10years          | 8049940-3 | PG I | 59.6  |
| female | 8years 10months  | 6234043-4 | PG I | 34.5  |
| male   | 7years 10months  | 8573764-3 | PG I | 52.9  |
| male   | 3years 5months   | 7832688-3 | PG I | 39.1  |
| male   | 12years 2months  | 8416703-4 | PG I | 54.9  |
| female | 11years 1months  | 4016087-2 | PG I | 32.1  |
| male   | 4years 10months  | 6204401-3 | PG I | 23.5  |
| male   | 10years 1months  | 7824021-3 | PG I | 30.5  |
| male   | 2years           | 741297    | PG I | 33.1  |
| female | 8years           | 465509    | PG I | 42.6  |
| male   | 12years          | 741301    | PG I | 99.7  |
| male   | 9years 6months   | 6303063-4 | PG I | 36.0  |
| male   | 10years 1months  | 4635818-2 | PG I | 33.3  |
| male   | 10years 11months | 742615    | PG I | 56.9  |
| female | 9years 6months   | 8291017-3 | PG I | 37.0  |
| male   | 1years 8months   | 8398730-4 | PG I | 47.9  |
| female | 13years 6months  | 730049    | PG I | 24.3  |
| female | 8years 2months   | 4229505-4 | PG I | 110.9 |
| male   | 5years 8months   | 5863753-4 | PG I | 36.2  |
| male   | 4years           | 741331    | PG I | 23.8  |
| male   | 4years 7months   | 694675    | PG I | 49.2  |
| male   | 13years 2months  | 3420198-4 | PG I | 40.2  |
| female | 3years           | 8585450-3 | PG I | 32.9  |

|        |                  |           |      |       |
|--------|------------------|-----------|------|-------|
| male   | 13years 1months  | 7417535-3 | PG I | 73.0  |
| male   | 6years 3months   | 6812388-4 | PG I | 35.1  |
| female | 5years           | 8583335-3 | PG I | 35.2  |
| male   | 10years 11months | 601323    | PG I | 47.2  |
| male   | 1years 7months   | 8580521-3 | PG I | 37.6  |
| female | 11years 5months  | 7168246-4 | PG I | 38.4  |
| female | 9years 5months   | 7380658-3 | PG I | 41.4  |
| male   | 9years 3months   | 742976    | PG I | 63.9  |
| male   | 16years          | 7012394-3 | PG I | 32.9  |
| female | 10years 8months  | 8587486-3 | PG I | 36.4  |
| male   | 3years 4months   | 7578600-4 | PG I | 45.1  |
| male   | 15years          | 4744969-4 | PG I | 95.0  |
| male   | 17years          | 4860162-4 | PG I | 47.3  |
| male   | 9years 2months   | 6993257-4 | PG I | 73.2  |
| male   | 8years 4months   | 4468028-2 | PG I | 45.4  |
| female | 1years 9months   | 7642276-3 | PG I | 35.4  |
| male   | 10years 5months  | 3491683-4 | PG I | 59.1  |
| female | 6years 11months  | 8419828-3 | PG I | 29.5  |
| female | 2years 5months   | 7637344-3 | PG I | 33.7  |
| male   | 9years 11months  | 743168    | PG I | 68.9  |
| female | 3years           | 743145    | PG I | 41.4  |
| male   | 5years 2months   | 6035195-4 | PG I | 42.3  |
| female | 9years 8months   | 8285396-3 | PG I | 35.7  |
| female | 8years 8months   | 6574408-4 | PG I | 43.9  |
| male   | 9months 16days   | 8591481-3 | PG I | 30.2  |
| male   | 13years 1months  | 743100    | PG I | 151.0 |
| female | 12years 3months  | 6560448-2 | PG I | 45.8  |
| male   | 1years 6months   | 8413216-3 | PG I | 33.3  |
| male   | 6years           | 8563331-3 | PG I | 41.4  |
| male   | 4years 3months   | 8531549-4 | PG I | 32.8  |
| male   | 9months 15days   | 8322947-3 | PG I | 40.3  |
| male   | 6years 3months   | 8429776-3 | PG I | 34.2  |
| female | 5years 2months   | 8561203-3 | PG I | 46.6  |

|        |                  |           |      |      |
|--------|------------------|-----------|------|------|
| male   | 6years 2months   | 6610134-3 | PG I | 60.8 |
| male   | 4years 2months   | 8593757-3 | PG I | 28.8 |
| male   | 3years 8months   | 657178    | PG I | 33.4 |
| male   | 5years 4months   | 723978    | PG I | 33.1 |
| female | 12years 4months  | 8599376-3 | PG I | 35.2 |
| male   | 12years 8months  | 8045140-2 | PG I | 38.6 |
| male   | 7years 6months   | 8597982-3 | PG I | 40.7 |
| male   | 15years          | 4648001-2 | PG I | 43.2 |
| female | 7years 4months   | 743501    | PG I | 41.8 |
| female | 1years           | 8274719-3 | PG I | 37.7 |
| male   | 1years 7months   | 7992197-3 | PG I | 48.7 |
| male   | 5years 4months   | 7069685-3 | PG I | 28.2 |
| male   | 1years 7months   | 7809233-3 | PG I | 35.0 |
| female | 4years 8months   | 7074547-4 | PG I | 35.5 |
| female | 6years 5months   | 6226016-3 | PG I | 32.7 |
| female | 7years 3months   | 6559353-3 | PG I | 22.0 |
| female | 4years 6months   | 7407709-3 | PG I | 40.4 |
| male   | 2years 9months   | 7693775-3 | PG I | 43.9 |
| female | 9years 8months   | 6100824-4 | PG I | 46.2 |
| male   | 5years 11months  | 6685050-3 | PG I | 28.5 |
| female | 12years 11months | 6925348-4 | PG I | 34.7 |
| male   | 5years 3months   | 7302119-3 | PG I | 45.9 |
| male   | 6years 1months   | 6233643-3 | PG I | 50.6 |
| male   | 7years           | 8286162-3 | PG I | 38.4 |
| male   | 2years 5months   | 8599726-3 | PG I | 40.6 |
| female | 5years 9months   | 6674307-4 | PG I | 28.8 |
| female | 5years 6months   | 5999826-4 | PG I | 25.7 |
| female | 7years 11months  | 6930717-3 | PG I | 44.4 |
| male   | 4years 1months   | 7332885-4 | PG I | 46.4 |
| male   | 4years 6months   | 8162834-3 | PG I | 30.8 |
| female | 6years 3months   | 5272491-4 | PG I | 36.0 |
| female | 7years 7months   | 8606798-3 | PG I | 54.3 |
| male   | 1years 10months  | 8600861-3 | PG I | 31.4 |
| female | 7years 3months   | 4914444-4 | PG I | 49.6 |
| male   | 4years 9months   | 6315082-3 | PG I | 32.7 |
| male   | 11years 4months  | 244159    | PG I | 32.3 |
| female | 10months 25days  | 8599018-3 | PG I | 55.7 |
| male   | 7years 9months   | 7044552-4 | PG I | 61.3 |



|        |                  |           |      |       |
|--------|------------------|-----------|------|-------|
| male   | 8years 1months   | 8610418-4 | PG I | 45.3  |
| female | 4years 5months   | 6513070-4 | PG I | 42.9  |
| male   | 8years 2months   | 8133457-4 | PG I | 61.3  |
| male   | 1years 7months   | 7859067-3 | PG I | 41.0  |
| male   | 11years 10months | 8474394-3 | PG I | 102.6 |
| female | 2years 11months  | 7865203-3 | PG I | 35.7  |
| female | 11months 7days   | 8609625-3 | PG I | 34.4  |
| female | 4years 2months   | 8607176-3 | PG I | 34.6  |
| female | 5years 1months   | 7409124-3 | PG I | 38.6  |
| male   | 6years           | 8125196-3 | PG I | 36.1  |
| female | 2years 4months   | 8611222-3 | PG I | 36.0  |
| male   | 4years 6months   | 6448193-4 | PG I | 36.5  |
| male   | 8years 10months  | 7599331-3 | PG I | 52.9  |
| female | 3years 2months   | 8568875-3 | PG I | 43.6  |
| female | 7years 3months   | 744869    | PG I | 53.0  |
| female | 5years 10months  | 8593770-3 | PG I | 23.4  |
| male   | 6years 2months   | 743933    | PG I | 181.5 |
| female | 6years 1months   | 5872161-4 | PG I | 37.9  |
| male   | 10years 2months  | 7095684-4 | PG I | 58.5  |
| female | 5years 9months   | 7137780-4 | PG I | 46.2  |
| male   | 5years 8months   | 5887118-4 | PG I | 38.9  |
| female | 13years 4months  | 8449682-3 | PG I | 90.5  |
| female | 1years 11months  | 7603028-3 | PG I | 49.1  |
| female | 2years 2months   | 7629443-3 | PG I | 55.7  |
| male   | 8years 6months   | 8614252-3 | PG I | 64.0  |
| female | 11months 8days   | 8160887-3 | PG I | 41.5  |
| female | 1years 7months   | 7955404-3 | PG I | 47.4  |
| male   | 2years 9months   | 7434238-4 | PG I | 49.6  |
| female | 1years 2months   | 8112394-3 | PG I | 50.4  |
| male   | 1years 1months   | 8046958-2 | PG I | 31.2  |
| female | 3years 3months   | 8421507-3 | PG I | 52.9  |
| male   | 3years 7months   | 7080745-3 | PG I | 37.4  |
| male   | 2years 3months   | 8611254-3 | PG I | 47.2  |
| male   | 4years 3months   | 6755996-4 | PG I | 46.9  |

|        |                  |           |      |       |
|--------|------------------|-----------|------|-------|
| female | 8months 16days   | 8532773-3 | PG I | 26.6  |
| female | 3years           | 8318790-3 | PG I | 66.2  |
| female | 2years 11months  | 7887922-3 | PG I | 43.7  |
| male   | 3years 5months   | 7019823-3 | PG I | 39.5  |
| male   | 1years 6months   | 7937128-3 | PG I | 52.0  |
| male   | 1years           | 8268358-3 | PG I | 49.1  |
| male   | 7years 1months   | 745494    | PG I | 33.3  |
| male   | 11years 7months  | 679798    | PG I | 50.7  |
| female | 7years 6months   | 744360    | PG I | 36.8  |
| male   | 6years 11months  | 744381    | PG I | 43.1  |
| female | 1years 6months   | 8358387-3 | PG I | 37.0  |
| female | 3years 6months   | 745206    | PG I | 24.1  |
| male   | 10months 17days  | 8621673-3 | PG I | 37.8  |
| male   | 12years 11months | 685434    | PG I | 299.6 |
| male   | 6years 8months   | 745734    | PG I | 50.1  |
| male   | 8years 8months   | 727590    | PG I | 55.0  |
| male   | 10years 9months  | 739629    | PG I | 121.6 |
| male   | 8years 3months   | 7991156-3 | PG I | 72.5  |
| male   | 1years 5months   | 8542468-4 | PG I | 61.5  |
| male   | 1years 2months   | 7987977-2 | PG I | 28.8  |
| male   | 6years 11months  | 8622426-4 | PG I | 46.2  |
| male   | 3years           | 7407414-3 | PG I | 42.8  |
| male   | 6years 10months  | 7745138-3 | PG I | 52.0  |
| female | 3years 5months   | 7184297-3 | PG I | 55.6  |
| female | 6years 4months   | 8617138-3 | PG I | 45.3  |
| male   | 4years 6months   | 6670544-3 | PG I | 57.1  |
| male   | 11years 3months  | 8618453-2 | PG I | 91.0  |
| male   | 5years 4months   | 8446218-3 | PG I | 57.6  |
| male   | 4years 3months   | 745618    | PG I | 32.7  |
| female | 5years 8months   | 8023945-3 | PG I | 38.2  |
| female | 7years 3months   | 4684221-4 | PG I | 52.5  |
| female | 2years 3months   | 8043918-4 | PG I | 45.1  |
| male   | 10years 2months  | 8491930-3 | PG I | 295.8 |
| male   | 2years 4months   | 7564646-4 | PG I | 53.9  |
| female | 1years 2months   | 8618277-3 | PG I | 47.8  |

|        |                  |           |      |       |
|--------|------------------|-----------|------|-------|
| male   | 3years 1months   | 7157323-3 | PG I | 47.1  |
| female | 6years 3months   | 7326971-3 | PG I | 35.4  |
| male   | 2years 2months   | 7804096-3 | PG I | 35.8  |
| female | 4years 7months   | 6457939-3 | PG I | 47.1  |
| male   | 6years           | 8362250-3 | PG I | 45.0  |
| male   | 6years           | 5957902-2 | PG I | 24.0  |
| male   | 6years 10months  | 8626438-3 | PG I | 32.4  |
| male   | 5years           | 8201103-3 | PG I | 56.6  |
| male   | 12years 10months | 8548008-3 | PG I | 51.7  |
| female | 1years 3months   | 8619190-3 | PG I | 51.1  |
| female | 5years 9months   | 7813744-3 | PG I | 45.6  |
| male   | 8months 28days   | 8624594-3 | PG I | 57.8  |
| male   | 3years 11months  | 7622537-3 | PG I | 38.7  |
| female | 1years 8months   | 692971    | PG I | 50.7  |
| female | 9years 11months  | 3615042-4 | PG I | 53.3  |
| male   | 12years          | 8624470-3 | PG I | 47.1  |
| female | 1years 3months   | 7985126-3 | PG I | 41.4  |
| female | 4years 1months   | 7564676-3 | PG I | 30.8  |
| male   | 6years 10months  | 7983004-3 | PG I | 41.8  |
| male   | 10years          | 6719981-3 | PG I | 48.8  |
| female | 6years 11months  | 7663895-3 | PG I | 57.4  |
| female | 13years 6months  | 5637734-4 | PG I | 113.7 |
| female | 9years 3months   | 8628888-3 | PG I | 43.1  |
| male   | 6years 3months   | 8629823-3 | PG I | 42.2  |
| male   | 17years          | 8090268-3 | PG I | 62.3  |
| male   | 8years 2months   | 7509974-3 | PG I | 57.9  |
| male   | 9years 11months  | 8630839-4 | PG I | 57.1  |
| female | 4years 3months   | 6589939-4 | PG I | 36.7  |
| male   | 10months 26days  | 8155717-4 | PG I | 38.0  |
| female | 8years 5months   | 6883071-3 | PG I | 50.5  |
| female | 15years          | 6028392-4 | PG I | 44.1  |
| female | 6years 2months   | 5321669-4 | PG I | 35.9  |
| male   | 7years 2months   | 5729518-4 | PG I | 42.0  |
| male   | 5years 9months   | 8568162-3 | PG I | 32.1  |

|        |                  |           |      |       |
|--------|------------------|-----------|------|-------|
| male   | 5years 8months   | 5942737-3 | PG I | 32.5  |
| male   | 9years 2months   | 739763    | PG I | 171.2 |
| male   | 17years          | 746503    | PG I | 173.2 |
| female | 6years 5months   | 746451    | PG I | 94.7  |
| female | 4years 11months  | 6367641-4 | PG I | 278.0 |
| male   | 6years 10months  | 5231242-4 | PG I | 43.3  |
| female | 10years 11months | 8632899-3 | PG I | 94.5  |
| male   | 1years 9months   | 7757173-3 | PG I | 29.9  |
| male   | 7years           | 8376038-4 | PG I | 51.9  |
| male   | 8years 10months  | 8633137-4 | PG I | 63.0  |
| female | 1years 6months   | 8016188-3 | PG I | 43.9  |
| male   | 1years 9months   | 8595220-3 | PG I | 43.3  |
| female | 7months 8days    | 8394125-4 | PG I | 45.4  |
| male   | 4years 5months   | 7355877-3 | PG I | 47.5  |
| male   | 2years 1months   | 8626872-3 | PG I | 36.4  |
| male   | 10years          | 710483    | PG I | 82.2  |
| female | 9years 10months  | 315796    | PG I | 24.0  |
| female | 4months 21days   | 8464356-3 | PG I | 36.7  |
| female | 2years 3months   | 7663593-3 | PG I | 40.6  |
| male   | 3years 5months   | 7573498-3 | PG I | 38.5  |
| female | 10years 1months  | 6216431-4 | PG I | 44.4  |
| male   | 2years 11months  | 8320937-3 | PG I | 45.1  |
| male   | 3years 10months  | 8161720-3 | PG I | 31.4  |
| male   | 2years 5months   | 7636660-3 | PG I | 60.4  |
| male   | 12years 1months  | 6264265-4 | PG I | 69.5  |
| male   | 9years           | 8401090-3 | PG I | 51.7  |
| male   | 5years 10months  | 746305    | PG I | 39.0  |
| female | 2years 7months   | 682385    | PG I | 23.3  |
| male   | 1years 1months   | 8490291-4 | PG I | 31.4  |
| female | 4years 8months   | 6470658-4 | PG I | 49.8  |
| female | 12years 1months  | 8636395-3 | PG I | 45.8  |
| female | 5years 6months   | 5962782-3 | PG I | 30.8  |
| male   | 13years 3months  | 8361572-3 | PG I | 56.0  |
| female | 6years 2months   | 8630236-4 | PG I | 188.4 |
| female | 2years 6months   | 8636257-3 | PG I | 65.9  |
| female | 1years 1months   | 8059365-4 | PG I | 49.9  |
| male   | 1years 7months   | 7915371-3 | PG I | 39.0  |
| female | 1years 1months   | 8637517-3 | PG I | 52.1  |
| male   | 2years 6months   | 8450355-3 | PG I | 51.9  |
| female | 1years 3months   | 8571390-3 | PG I | 43.0  |
| female | 5years 3months   | 6716259-4 | PG I | 32.7  |
| male   | 12years 2months  | 746280    | PG I | 40.5  |

|        |                 |           |      |       |
|--------|-----------------|-----------|------|-------|
| male   | 8years 7months  | 4276495-2 | PG I | 36.4  |
| female | 8years 1months  | 8613207-3 | PG I | 41.4  |
| male   | 8years 10months | 4194774-4 | PG I | 52.6  |
| female | 10months 14days | 8632785-3 | PG I | 57.7  |
| female | 5years 7months  | 6105137-4 | PG I | 42.3  |
| male   | 12years 7months | 747153    | PG I | 38.1  |
| female | 5years 8months  | 6027170-4 | PG I | 58.2  |
| female | 5years 6months  | 8465260-3 | PG I | 47.1  |
| male   | 5years 3months  | 8643850-3 | PG I | 50.5  |
| male   | 2years 10months | 7530635-4 | PG I | 36.5  |
| female | 13years 6months | 8640496-3 | PG I | 45.6  |
| female | 13years 8months | 7916457-3 | PG I | 39.4  |
| female | 10months 15days | 8369858-3 | PG I | 45.9  |
| male   | 3years 2months  | 7187575-3 | PG I | 41.1  |
| male   | 13years         | 4790841-4 | PG I | 61.1  |
| female | 4years 8months  | 6579522-3 | PG I | 36.0  |
| male   | 6years 2months  | 5699950-2 | PG I | 38.4  |
| male   | 7years 5months  | 4644751-4 | PG I | 53.6  |
| male   | 6years 7months  | 4948756-4 | PG I | 38.9  |
| female | 6years          | 6782403-4 | PG I | 41.4  |
| female | 2years 11months | 7203528-3 | PG I | 38.8  |
| male   | 8years 11months | 8644601-3 | PG I | 42.7  |
| female | 5years 3months  | 8402964-3 | PG I | 34.9  |
| male   | 5years 6months  | 6941026-3 | PG I | 56.9  |
| female | 4months 16days  | 8511999-3 | PG I | 29.6  |
| male   | 2years 5months  | 7945940-3 | PG I | 40.3  |
| female | 9years 3months  | 747537    | PG I | 28.7  |
| male   | 1years 6months  | 7819530-3 | PG I | 39.1  |
| male   | 10years         | 747264    | PG I | 41.7  |
| female | 4years 2months  | 8641535-3 | PG I | 30.2  |
| female | 8years 2months  | 8639703-3 | PG I | 47.6  |
| male   | 1years 2months  | 8101561-3 | PG I | 46.8  |
| male   | 9years 5months  | 8603846-3 | PG I | 39.3  |
| male   | 9years 6months  | 8647485-3 | PG I | 24.8  |
| male   | 7months 19days  | 8431029-3 | PG I | 39.3  |
| female | 11years         | 747687    | PG I | 23.1  |
| female | 7years 7months  | 747649    | PG I | 33.0  |
| male   | 5years 7months  | 8282543-3 | PG I | 33.2  |
| male   | 7months 24days  | 8648973-4 | PG I | 34.5  |
| male   | 2years 7months  | 7543735-3 | PG I | 31.9  |
| male   | 7years 8months  | 8648516-3 | PG I | 102.4 |
| female | 1years 7months  | 8646399-3 | PG I | 54.0  |

|        |                  |           |      |       |
|--------|------------------|-----------|------|-------|
| female | 9years 4months   | 8648248-3 | PG I | 67.7  |
| male   | 5years 3months   | 7031114-3 | PG I | 47.1  |
| male   | 7years           | 8613123-3 | PG I | 53.0  |
| male   | 5months 11days   | 8647560-3 | PG I | 25.7  |
| male   | 1years 5months   | 8649845-3 | PG I | 46.7  |
| female | 4years           | 8643832-3 | PG I | 33.7  |
| female | 1years 5months   | 8160845-3 | PG I | 34.7  |
| female | 4years 4months   | 6557528-4 | PG I | 38.9  |
| female | 2years           | 8650470-3 | PG I | 33.4  |
| male   | 13years 5months  | 747894    | PG I | 69.5  |
| male   | 3years 11months  | 8646600-3 | PG I | 55.0  |
| female | 5years 3months   | 6272559-3 | PG I | 38.7  |
| male   | 11years 10months | 8651938-3 | PG I | 100.5 |
| male   | 6years 4months   | 7877186-3 | PG I | 53.7  |
| male   | 10years 10months | 3400369-4 | PG I | 47.6  |
| male   | 10years          | 747902    | PG I | 40.7  |
| male   | 4years 6months   | 6774599-3 | PG I | 56.3  |
| female | 3years 1months   | 7444116-3 | PG I | 83.8  |
| male   | 4years 10months  | 6376495-3 | PG I | 54.4  |
| female | 7years 9months   | 8061873-3 | PG I | 55.6  |
| male   | 4years 4months   | 8628323-3 | PG I | 37.0  |
| female | 12years 10months | 8515190-3 | PG I | 30.4  |
| male   | 8years 3months   | 7727173-3 | PG I | 55.0  |
| female | 9years           | 8476453-3 | PG I | 60.7  |
| female | 3years 5months   | 7169763-4 | PG I | 20.9  |
| male   | 9years 4months   | 3847896-4 | PG I | 47.1  |
| female | 5years 1months   | 8032718-3 | PG I | 37.6  |
| female | 8years 3months   | 7029393-4 | PG I | 33.2  |
| male   | 8years 3months   | 4296587-4 | PG I | 44.0  |
| female | 4years 7months   | 6714047-4 | PG I | 45.6  |
| male   | 4years 4months   | 8654652-3 | PG I | 27.9  |
| male   | 9years 5months   | 5774838-4 | PG I | 44.6  |
| male   | 5years 4months   | 7247586-3 | PG I | 52.6  |

|        |                  |           |      |      |
|--------|------------------|-----------|------|------|
| female | 1years 4months   | 8006026-3 | PG I | 59.5 |
| female | 10months 14days  | 8649194-3 | PG I | 41.3 |
| male   | 2years 6months   | 7554962-3 | PG I | 27.5 |
| female | 6years 7months   | 7811235-3 | PG I | 54.1 |
| female | 5years 3months   | 8657382-4 | PG I | 37.0 |
| female | 6years 10months  | 8657700-4 | PG I | 40.1 |
| female | 5years 6months   | 7439697-3 | PG I | 46.7 |
| male   | 4years 5months   | 6541630-3 | PG I | 67.6 |
| male   | 8years 6months   | 8641922-4 | PG I | 69.1 |
| male   | 4years 3months   | 6846177-4 | PG I | 44.2 |
| female | 4years 6months   | 8657753-4 | PG I | 40.5 |
| female | 2years 9months   | 8206729-3 | PG I | 38.6 |
| female | 1years 3months   | 8117792-3 | PG I | 31.9 |
| female | 1years 9months   | 7946087-3 | PG I | 38.7 |
| female | 8months 3days    | 8438201-3 | PG I | 47.0 |
| male   | 5years 2months   | 8222590-3 | PG I | 51.2 |
| female | 12years 5months  | 748374    | PG I | 50.6 |
| male   | 3years 2months   | 7555992-3 | PG I | 53.4 |
| female | 3years 7months   | 7101623-3 | PG I | 62.5 |
| female | 4years 3months   | 7063918-3 | PG I | 36.8 |
| male   | 3years           | 8654362-3 | PG I | 36.7 |
| male   | 7years 6months   | 7624508-3 | PG I | 41.5 |
| female | 5years           | 7964228-3 | PG I | 61.8 |
| female | 1years 5months   | 8658243-3 | PG I | 25.8 |
| male   | 4years 5months   | 7921165-3 | PG I | 34.2 |
| male   | 1years 7months   | 8654593-3 | PG I | 68.3 |
| male   | 4years 4months   | 6573265-4 | PG I | 38.7 |
| male   | 4years 9months   | 8655578-3 | PG I | 45.8 |
| female | 5years 10months  | 8657718-3 | PG I | 50.1 |
| female | 13years 10months | 8659647-3 | PG I | 48.4 |
| male   | 4years 7months   | 748456    | PG I | 39.3 |
| male   | 9years 5months   | 8635053-3 | PG I | 43.6 |

|        |                 |           |      |       |
|--------|-----------------|-----------|------|-------|
| male   | 9years 9months  | 8104550-3 | PG I | 44.8  |
| female | 7years 3months  | 7416431-4 | PG I | 35.6  |
| male   | 5years 7months  | 7216394-4 | PG I | 40.9  |
| female | 2years 4months  | 7502953-3 | PG I | 47.4  |
| female | 2years 4months  | 7787062-3 | PG I | 58.7  |
| male   | 7years 4months  | 4676727-4 | PG I | 41.4  |
| female | 3years 8months  | 747555    | PG I | 65.2  |
| female | 9years 2months  | 748652    | PG I | 42.2  |
| male   | 2years 2months  | 748516    | PG I | 39.9  |
| male   | 10years 8months | 748117    | PG I | 59.2  |
| male   | 6years 1months  | 6120913-4 | PG I | 83.3  |
| male   | 1years 3months  | 8024426-3 | PG I | 47.7  |
| female | 6months 20days  | 8663625-3 | PG I | 40.2  |
| male   | 1years 5months  | 8052974-3 | PG I | 63.1  |
| male   | 1years 9months  | 8299891-3 | PG I | 38.8  |
| female | 9years 10months | 8633701-3 | PG I | 32.0  |
| female | 4years 7months  | 6465219-4 | PG I | 41.2  |
| female | 4years 7months  | 8668237-4 | PG I | 39.1  |
| female | 8years 10months | 749174    | PG I | 50.5  |
| female | 4years 9months  | 8481778-3 | PG I | 36.1  |
| female | 7years 9months  | 8668429-4 | PG I | 56.2  |
| male   | 5years 2months  | 6263825-4 | PG I | 46.9  |
| male   | 6years 8months  | 5286686-4 | PG I | 55.6  |
| male   | 5years 11months | 7198866-3 | PG I | 36.7  |
| male   | 13years 9months | 749412    | PG I | 221.6 |
| female | 4years 6months  | 749422    | PG I | 34.7  |
| female | 3years 7months  | 6992379-3 | PG I | 28.1  |
| male   | 12years 3months | 4907018-4 | PG I | 43.8  |
| female | 4years 6months  | 6985118-3 | PG I | 39.0  |
| female | 6years 9months  | 7024667-3 | PG I | 49.4  |
| female | 3years 6months  | 8475434-3 | PG I | 46.2  |
| female | 3years          | 749500    | PG I | 46.4  |
| female | 9years 8months  | 749484    | PG I | 54.0  |
| male   | 9years 9months  | 8671059-3 | PG I | 57.1  |
| male   | 3years 2months  | 7100762-3 | PG I | 54.2  |



|        |                  |           |       |       |
|--------|------------------|-----------|-------|-------|
| female | 5years 3months   | 6655201-4 | PG I  | 47.9  |
| female | 6years 8months   | 8177953-3 | PG I  | 72.6  |
| female | 1years 11months  | 7608937-4 | PG I  | 51.7  |
| female | 7years 11months  | 5227073-4 | PG I  | 32.2  |
| female | 16years          | 746957    | PG I  | 126.5 |
| female | 9years 3months   | 6285997-3 | PG I  | 47.2  |
| male   | 11years 1months  | 8671244-3 | PG I  | 83.8  |
| male   | 13years 9months  | 749412    | PG I  | 109.9 |
| female | 6years 9months   | 5278895-4 | PG I  | 33.9  |
| female | 4months 26days   | 8672467-3 | PG I  | 28.1  |
| male   | 11years 11months | 749591    | PG I  | 43.8  |
| female | 6years           | 6975339-4 | PG I  | 41.0  |
| female | 5years 4months   | 8672774-3 | PG I  | 33.2  |
| female | 10years 2months  | 3636493-2 | PG I  | 44.9  |
| male   | 8years 2months   | 6255604-4 | PG I  | 109.2 |
| female | 8months 13days   | 8665592-3 | PG I  | 51.5  |
| female | 4years 2months   | 6771386-3 | PG I  | 46.6  |
| male   | 6years 11months  | 5785634-2 | PG I  | 58.1  |
| male   | 3years 1months   | 8671064-4 | PG I  | 24.5  |
| male   | 9years 9months   | 4558036-4 | PG I  | 41.5  |
| male   | 4years 4months   | 7645688-4 | PG I  | 83.2  |
| female | 5years 3months   | 699279    | PG II | 28.4  |
| male   | 10years 4months  | 698576    | PG II | 39.5  |
| male   | 8years 7months   | 699244    | PG II | 61.4  |
| female | 9years 7months   | 7972998-3 | PG II | 28.4  |
| female | 5years 3months   | 7969728-3 | PG II | 19.3  |
| male   | 3years           | 7971126-3 | PG II | 27.4  |
| male   | 2years 7months   | 7972110-3 | PG II | 29.5  |
| male   | 7years 9months   | 7973389-3 | PG II | 25.8  |
| male   | 9years 6months   | 699904    | PG II | 122.0 |
| female | 8years 5months   | 5737934-4 | PG II | 25.8  |
| female | 5years           | 5810524-3 | PG II | 17.4  |
| male   | 8years 5months   | 4147025-4 | PG II | 22.1  |
| female | 7years 6months   | 699258    | PG II | 28.0  |
| female | 9years 4months   | 7963363-4 | PG II | 30.7  |
| female | 10years          | 6674130-4 | PG II | 16.1  |
| male   | 3years 3months   | 7972784-3 | PG II | 22.0  |
| female | 5years 9months   | 7904620-3 | PG II | 16.0  |

|        |                      |           |       |      |
|--------|----------------------|-----------|-------|------|
| male   | 4years 1months       | 6383780-4 | PG II | 17.9 |
| female | 4years 2months 5days | 7974811-4 | PG II | 24.0 |
| male   | 6years               | 7975004-4 | PG II | 18.0 |
| male   | 6years               | 4724240-4 | PG II | 24.0 |
| female | 11years              | 670482    | PG II | 25.1 |
| male   | 10years 2months      | 695629    | PG II | 21.1 |
| male   | 3years 11months      | 6640181-4 | PG II | 22.2 |
| male   | 9years               | 6272602-4 | PG II | 31.7 |
| male   | 4years 4months       | 6413580-4 | PG II | 18.0 |
| female | 6years               | 6937158-4 | PG II | 17.9 |
| female | 17years              | 7830366-3 | PG II | 16.2 |
| male   | 2years 9months       | 6781393-4 | PG II | 18.7 |
| male   | 5years               | 7976444-3 | PG II | 22.1 |
| male   | 3years 8months       | 7362776-3 | PG II | 22.3 |
| male   | 4years 5months       | 7896567-3 | PG II | 17.6 |
| male   | 6years 6months       | 4739772-2 | PG II | 17.8 |
| male   | 4years 1months       | 7452261-3 | PG II | 23.8 |
| female | 8years 4months       | 700131    | PG II | 56.7 |
| female | 8years 9months       | 7980678-3 | PG II | 15.7 |
| male   | 4years 9months       | 6502898-3 | PG II | 8.0  |
| male   | 11years 10months     | 7932766-4 | PG II | 9.3  |
| female | 4years 1months       | 7973073-3 | PG II | 9.4  |
| male   | 9years 7months       | 700389    | PG II | 9.2  |
| female | 4years 9months       | 7784183-3 | PG II | 6.6  |
| male   | 6years 6months       | 699529    | PG II | 14.1 |
| female | 6years 5months       | 624304    | PG II | 9.1  |
| male   | 4years 6months       | 700881    | PG II | 6.6  |
| female | 3years 6months       | 700665    | PG II | 10.9 |
| male   | 13years 8months      | 700639    | PG II | 11.7 |
| female | 3years 1months       | 6937388-3 | PG II | 8.7  |
| male   | 1years 6months       | 700572    | PG II | 7.4  |
| male   | 3years 2months       | 7986107-3 | PG II | 11.0 |
| male   | 8years 8months       | 7964681-4 | PG II | 3.5  |
| male   | 7years 7months       | 6960244-3 | PG II | 6.9  |
| male   | 4years 1months       | 6109623-3 | PG II | 13.8 |
| female | 5years 1months       | 7471906-3 | PG II | 6.7  |

|        |                  |           |       |      |
|--------|------------------|-----------|-------|------|
| female | 5years 5months   | 7842710-3 | PG II | 7.9  |
| male   | 3years 10months  | 7473291-3 | PG II | 6.4  |
| male   | 4years 11months  | 7986092-3 | PG II | 7.1  |
| male   | 2years 11months  | 7464079-3 | PG II | 9.4  |
| female | 4years 5months   | 6021989-2 | PG II | 7.7  |
| male   | 13years 1months  | 3410834-4 | PG II | 14.6 |
| female | 6years 2months   | 4779997-2 | PG II | 7.2  |
| male   | 13years 11months | 700909    | PG II | 17.2 |
| male   | 5years 9months   | 5751008-4 | PG II | 8.5  |
| female | 8years 2months   | 7223608-4 | PG II | 5.6  |
| male   | 8years 4months   | 4241826-2 | PG II | 6.3  |
| female | 3years 3months   | 702811    | PG II | 24.1 |
| male   | 8years 10months  | 7899450-3 | PG II | 13.0 |
| female | 3years 5months   | 7146581-3 | PG II | 6.2  |
| male   | 10years 1months  | 698980    | PG II | 9.7  |
| male   | 3years 10months  | 8001845-3 | PG II | 11.5 |
| female | 5years 11months  | 7888723-3 | PG II | 7.5  |
| female | 3years 9months   | 8005477-3 | PG II | 4.5  |
| male   | 10years 6months  | 6524385-4 | PG II | 13.2 |
| male   | 4years 11months  | 5748497-4 | PG II | 8.0  |
| male   | 5years 8months   | 5295537-4 | PG II | 5.0  |
| female | 1years 4months   | 7666225-4 | PG II | 10.8 |
| female | 9years 4months   | 8016427-4 | PG II | 6.7  |
| female | 8years 9months   | 7928099-3 | PG II | 8.0  |
| male   | 10years 6months  | 3578968-4 | PG II | 7.6  |
| male   | 3years 7months   | 7961608-3 | PG II | 3.2  |
| male   | 6years 6months   | 6119429-3 | PG II | 32.2 |
| male   | 8years           | 5721496-4 | PG II | 10.1 |
| male   | 3years 6months   | 7793218-3 | PG II | 9.9  |
| male   | 3years 2months   | 8032393-3 | PG II | 6.7  |
| male   | 3years 9months   | 6398641-4 | PG II | 6.3  |
| male   | 11years          | 3911658-4 | PG II | 8.3  |
| female | 7years           | 7733927-3 | PG II | 8.1  |
| male   | 7years           | 7385739-3 | PG II | 8.5  |
| male   | 8years 11months  | 704315    | PG II | 19.0 |

|        |                  |           |       |      |
|--------|------------------|-----------|-------|------|
| male   | 11years 3months  | 658125    | PG II | 15.9 |
| male   | 10years 3months  | 704414    | PG II | 10.4 |
| female | 2years 6months   | 6990753-4 | PG II | 9.0  |
| female | 11years          | 7987458-4 | PG II | 6.8  |
| male   | 6years 8months   | 704487    | PG II | 9.5  |
| male   | 7years 7months   | 8044968-3 | PG II | 8.9  |
| male   | 2years 8months   | 7005541-2 | PG II | 7.8  |
| male   | 4years 8months   | 704549    | PG II | 10.2 |
| female | 5years 11months  | 705304    | PG II | 10.9 |
| male   | 3years 1months   | 704562    | PG II | 8.2  |
| male   | 12years 3months  | 693496    | PG II | 27.2 |
| male   | 6years 10months  | 578029    | PG II | 10.3 |
| female | 10years 4months  | 493247    | PG II | 13.0 |
| female | 11years 5months  | 705466    | PG II | 4.4  |
| male   | 4years 6months   | 6092525-3 | PG II | 8.5  |
| male   | 2years 10months  | 8053004-3 | PG II | 5.7  |
| female | 2years 1months   | 8053274-3 | PG II | 31.5 |
| male   | 13years 4months  | 645856    | PG II | 9.6  |
| male   | 12years 11months | 705531    | PG II | 17.5 |
| male   | 8years 6months   | 705563    | PG II | 7.1  |
| female | 9years 1months   | 705570    | PG II | 9.7  |
| male   | 12years 3months  | 705634    | PG II | 7.9  |
| male   | 12years 10months | 705839    | PG II | 6.5  |
| male   | 11years 9months  | 705590    | PG II | 10.9 |
| male   | 3years 6months   | 6767552-3 | PG II | 7.4  |
| female | 9years 6months   | 705887    | PG II | 8.7  |
| female | 4years 9months   | 705916    | PG II | 10.2 |
| male   | 8years 2months   | 635646    | PG II | 10.0 |
| male   | 4years 5months   | 705947    | PG II | 8.1  |
| male   | 9years 10months  | 686401    | PG II | 10.4 |
| male   | 6years 5months   | 705963    | PG II | 12.8 |
| male   | 4years 4months   | 6220111-2 | PG II | 4.2  |
| male   | 9years 4months   | 291093    | PG II | 10.2 |
| male   | 9years 7months   | 705699    | PG II | 8.8  |
| male   | 13years 6months  | 531559    | PG II | 7.7  |
| female | 8years 2months   | 690675    | PG II | 18.0 |
| female | 12years 10months | 249601    | PG II | 7.4  |
| female | 7years 9months   | 705755    | PG II | 7.9  |
| female | 7years 4months   | 706175    | PG II | 7.5  |

|        |                  |           |       |      |
|--------|------------------|-----------|-------|------|
| male   | 13years 2months  | 706220    | PG II | 5.0  |
| male   | 11years 1months  | 666462    | PG II | 9.7  |
| male   | 10years 8months  | 706239    | PG II | 8.8  |
| male   | 10years 7months  | 688024    | PG II | 10.2 |
| male   | 7years           | 706351    | PG II | 8.5  |
| male   | 13years 1months  | 706335    | PG II | 9.0  |
| male   | 12years 2months  | 706410    | PG II | 7.6  |
| female | 9years 9months   | 706415    | PG II | 11.2 |
| female | 8years 1months   | 3934239-4 | PG II | 7.8  |
| male   | 10years 8months  | 706627    | PG II | 15.0 |
| male   | 11years 1months  | 706618    | PG II | 9.7  |
| male   | 5years 11months  | 706445    | PG II | 5.0  |
| male   | 5years 9months   | 706371    | PG II | 10.2 |
| male   | 9years 4months   | 8067225-3 | PG II | 17.7 |
| female | 5years 7months   | 706701    | PG II | 6.0  |
| female | 8years 9months   | 706658    | PG II | 22.6 |
| male   | 4years 11months  | 706468    | PG II | 7.6  |
| male   | 12years 2months  | 706718    | PG II | 14.4 |
| female | 12years 5months  | 706464    | PG II | 15.6 |
| male   | 8years 4months   | 332307    | PG II | 12.3 |
| female | 16years          | 706715    | PG II | 14.1 |
| female | 8years 3months   | 5747576-4 | PG II | 7.1  |
| male   | 10years 9months  | 4054226-2 | PG II | 22.1 |
| male   | 9years 7months   | 706737    | PG II | 9.7  |
| male   | 13years 11months | 699986    | PG II | 11.6 |
| male   | 10years          | 706881    | PG II | 11.4 |
| male   | 9years 4months   | 706877    | PG II | 8.7  |
| female | 8years 6months   | 706510    | PG II | 13.4 |
| female | 8years 1months   | 706964    | PG II | 10.6 |
| male   | 9years           | 685471    | PG II | 9.4  |
| female | 12years 2months  | 706583    | PG II | 15.6 |
| male   | 4years 2months   | 706574    | PG II | 8.6  |
| female | 8years 10months  | 8073240-3 | PG II | 10.1 |
| male   | 5years           | 707414    | PG II | 9.1  |
| female | 9years           | 707182    | PG II | 8.0  |
| male   | 10years 6months  | 707190    | PG II | 11.4 |
| female | 15years          | 707262    | PG II | 8.5  |

|        |                  |           |       |      |
|--------|------------------|-----------|-------|------|
| female | 8years 9months   | 707295    | PG II | 11.2 |
| male   | 13years 4months  | 707320    | PG II | 5.7  |
| female | 6years 1months   | 707329    | PG II | 8.9  |
| male   | 4years           | 6706424-4 | PG II | 8.2  |
| male   | 12years 6months  | 707374    | PG II | 9.5  |
| female | 6years 6months   | 707313    | PG II | 9.9  |
| female | 13years 10months | 653341    | PG II | 11.0 |
| male   | 6years 7months   | 558096    | PG II | 5.9  |
| male   | 13years          | 707463    | PG II | 8.9  |
| male   | 8years 5months   | 707629    | PG II | 69.8 |
| female | 6years 4months   | 707325    | PG II | 20.8 |
| male   | 7years 3months   | 707330    | PG II | 17.9 |
| male   | 5years 8months   | 707484    | PG II | 9.4  |
| male   | 12years 5months  | 707720    | PG II | 31.3 |
| female | 8years 5months   | 7592305-3 | PG II | 7.0  |
| male   | 11years 9months  | 707757    | PG II | 98.2 |
| male   | 10years 6months  | 707766    | PG II | 12.0 |
| female | 8years 8months   | 707527    | PG II | 4.5  |
| male   | 10years 11months | 707913    | PG II | 8.8  |
| male   | 12years 9months  | 707915    | PG II | 16.3 |
| male   | 2years 10months  | 6978064-3 | PG II | 7.4  |
| male   | 3years 6months   | 6633022-4 | PG II | 9.1  |
| male   | 11years 7months  | 707991    | PG II | 9.2  |
| female | 2years 6months   | 707580    | PG II | 5.2  |
| female | 2years 11months  | 707596    | PG II | 7.5  |
| female | 10years          | 691969    | PG II | 16.4 |
| male   | 5years 8months   | 708001    | PG II | 7.2  |
| male   | 12years 7months  | 708329    | PG II | 32.6 |
| male   | 2years 3months   | 7328852-3 | PG II | 6.7  |
| male   | 5years 9months   | 8065452-3 | PG II | 9.0  |
| male   | 9years 9months   | 708404    | PG II | 6.9  |
| male   | 3years 10months  | 708401    | PG II | 9.9  |
| male   | 3years 3months   | 708406    | PG II | 10.6 |
| female | 11years 1months  | 708037    | PG II | 7.4  |
| female | 10years 6months  | 708468    | PG II | 20.2 |
| male   | 17years          | 7346286-3 | PG II | 6.4  |
| female | 3years 8months   | 663817    | PG II | 11.2 |
| male   | 7years 2months   | 705553    | PG II | 9.3  |

|        |                  |           |       |      |
|--------|------------------|-----------|-------|------|
| male   | 8years 9months   | 446802    | PG II | 8.5  |
| female | 6years 4months   | 708728    | PG II | 7.6  |
| male   | 5years 1months   | 8085074-4 | PG II | 5.8  |
| male   | 8years 9months   | 708188    | PG II | 13.6 |
| female | 8years 7months   | 709056    | PG II | 5.8  |
| male   | 2years 8months   | 7068845-3 | PG II | 10.7 |
| female | 14years          | 709093    | PG II | 10.6 |
| female | 2years 7months   | 709116    | PG II | 8.2  |
| male   | 13years 3months  | 709152    | PG II | 10.9 |
| male   | 7years 10months  | 709176    | PG II | 12.2 |
| male   | 5years 2months   | 709196    | PG II | 17.3 |
| female | 6years 7months   | 709231    | PG II | 8.5  |
| male   | 13years 8months  | 709370    | PG II | 5.4  |
| female | 10years 10months | 709448    | PG II | 3.4  |
| male   | 7years 3months   | 7859687-3 | PG II | 8.1  |
| female | 1years 5months   | 709454    | PG II | 59.0 |
| female | 11years 10months | 709389    | PG II | 7.4  |
| male   | 12years 1months  | 190725    | PG II | 10.5 |
| male   | 11years 2months  | 709519    | PG II | 15.8 |
| male   | 16years          | 564216    | PG II | 94.6 |
| male   | 13years 7months  | 697058    | PG II | 10.3 |
| female | 12years 2months  | 709785    | PG II | 6.6  |
| male   | 3years 7months   | 8106021-3 | PG II | 16.9 |
| male   | 11years          | 656341    | PG II | 7.7  |
| male   | 11years 4months  | 709549    | PG II | 9.8  |
| male   | 8years 10months  | 709555    | PG II | 3.8  |
| male   | 2years 9months   | 708922    | PG II | 17.4 |
| female | 15years          | 698961    | PG II | 7.7  |
| female | 9years 10months  | 8110361-3 | PG II | 4.8  |
| male   | 7years 4months   | 8109733-3 | PG II | 8.8  |
| male   | 13years 9months  | 648337    | PG II | 6.0  |
| male   | 10years 8months  | 709822    | PG II | 16.9 |
| female | 13years 8months  | 709824    | PG II | 13.7 |
| male   | 10years 10months | 709815    | PG II | 10.3 |
| female | 6years 6months   | 709834    | PG II | 5.9  |
| female | 7years 4months   | 709864    | PG II | 8.4  |
| female | 10years 1months  | 710216    | PG II | 9.1  |
| male   | 10years 4months  | 709922    | PG II | 14.6 |

|        |                 |           |       |      |
|--------|-----------------|-----------|-------|------|
| male   | 12years 9months | 710373    | PG II | 11.2 |
| male   | 12years 9months | 698800    | PG II | 11.4 |
| male   | 15years         | 710393    | PG II | 6.6  |
| male   | 13years 1months | 710136    | PG II | 20.1 |
| male   | 10years 6months | 710415    | PG II | 8.5  |
| female | 3years 8months  | 549938    | PG II | 7.2  |
| male   | 9years 5months  | 706909    | PG II | 8.2  |
| female | 9years 10months | 710605    | PG II | 7.0  |
| female | 12years 5months | 710597    | PG II | 29.9 |
| female | 6years 10months | S32664    | PG II | 7.7  |
| female | 10years 3months | 710243    | PG II | 18.2 |
| male   | 9years 7months  | 676039    | PG II | 4.5  |
| female | 9years 8months  | 710817    | PG II | 10.0 |
| female | 10years         | 711201    | PG II | 11.5 |
| female | 12years 8months | 706249    | PG II | 11.1 |
| female | 2years 10months | 7924824-3 | PG II | 6.0  |
| male   | 11years 6months | 711314    | PG II | 7.5  |
| male   | 5years 11months | 537285    | PG II | 10.9 |
| female | 7years 5months  | 604618    | PG II | 6.0  |
| male   | 9years          | 685471    | PG II | 10.7 |
| male   | 13years 2months | 690943    | PG II | 13.5 |
| male   | 1years 9months  | 7384820-3 | PG II | 8.0  |
| female | 7years 4months  | 710907    | PG II | 5.4  |
| male   | 9years 9months  | 710908    | PG II | 6.0  |
| female | 10years 1months | 710905    | PG II | 10.8 |
| female | 3years          | 710919    | PG II | 14.9 |
| male   | 11years 6months | 252975    | PG II | 12.3 |
| female | 6years 10months | 712520    | PG II | 20.6 |
| female | 3years 11months | 677393    | PG II | 5.5  |
| male   | 10years 3months | 712495    | PG II | 10.1 |
| male   | 3years 5months  | 8042845-3 | PG II | 6.9  |
| male   | 8years 11months | 710992    | PG II | 12.7 |
| female | 13years 3months | 711620    | PG II | 19.0 |
| female | 4years 10months | 669451    | PG II | 3.8  |
| male   | 13years 2months | 711272    | PG II | 9.7  |
| male   | 3years 3months  | 7119838-3 | PG II | 6.4  |
| male   | 13years 5months | 712046    | PG II | 7.6  |
| male   | 10years 4months | 7150123-3 | PG II | 7.5  |
| male   | 13years 3months | 712114    | PG II | 17.0 |



|        |                  |           |       |      |
|--------|------------------|-----------|-------|------|
| male   | 7years 9months   | 712207    | PG II | 7.9  |
| male   | 9years 8months   | 712172    | PG II | 9.5  |
| female | 14years          | 712381    | PG II | 11.5 |
| male   | 12years          | 712748    | PG II | 15.7 |
| female | 9years 8months   | 712827    | PG II | 10.3 |
| female | 10years 7months  | 712818    | PG II | 8.5  |
| male   | 9months 4days    | 712611    | PG II | 12.3 |
| female | 3years 8months   | 8109428-3 | PG II | 9.2  |
| male   | 1years 8months   | 8156707-3 | PG II | 6.3  |
| male   | 10years 11months | 368354    | PG II | 9.2  |
| male   | 2years 6months   | 8157049-4 | PG II | 7.8  |
| female | 5years 6months   | 472537    | PG II | 15.6 |
| female | 12years 11months | 713021    | PG II | 6.5  |
| female | 10years 5months  | 713019    | PG II | 19.0 |
| male   | 10years 4months  | 713338    | PG II | 12.3 |
| male   | 13years 6months  | 714614    | PG II | 8.2  |
| female | 11years 5months  | 714670    | PG II | 4.7  |
| male   | 13years 2months  | 3398251-4 | PG II | 8.1  |
| female | 12years 11months | 714756    | PG II | 16.6 |
| female | 12years 10months | 714766    | PG II | 5.9  |
| female | 5years 11months  | 503196    | PG II | 6.8  |
| female | 12years 7months  | 715232    | PG II | 8.5  |
| female | 5years 9months   | 8164577-3 | PG II | 6.4  |
| male   | 9years 7months   | 715264    | PG II | 5.1  |
| male   | 5years           | 6817844-4 | PG II | 5.2  |
| male   | 9years 6months   | 340846    | PG II | 4.2  |
| female | 8years 6months   | 713151    | PG II | 7.0  |
| male   | 4years 8months   | 8149732-3 | PG II | 6.8  |
| male   | 7years           | 668191    | PG II | 11.1 |
| male   | 11years 1months  | 713172    | PG II | 27.2 |
| female | 5years 9months   | 714398    | PG II | 7.7  |
| female | 3years 7months   | 714826    | PG II | 9.5  |
| female | 5years 4months   | 5673608-4 | PG II | 7.1  |
| female | 6years 10months  | 713833    | PG II | 3.6  |
| female | 7years 10months  | 713473    | PG II | 7.0  |
| male   | 9years 3months   | 713476    | PG II | 6.8  |
| female | 2years 9months   | 8174769-3 | PG II | 3.9  |

|        |                  |           |       |      |
|--------|------------------|-----------|-------|------|
| female | 13years 4months  | 713948    | PG II | 14.5 |
| female | 3years 4months   | 7293423-4 | PG II | 7.0  |
| male   | 13years 2months  | 714051    | PG II | 11.5 |
| male   | 10years 9months  | 714049    | PG II | 12.8 |
| female | 4years 3months   | 714058    | PG II | 2.3  |
| male   | 12years 6months  | 4157759-1 | PG II | 11.4 |
| female | 10years          | 714112    | PG II | 5.9  |
| female | 9years 5months   | 714097    | PG II | 18.3 |
| male   | 6years           | 714099    | PG II | 15.8 |
| male   | 11years 4months  | 694106    | PG II | 14.2 |
| female | 7years 8months   | 713560    | PG II | 6.9  |
| male   | 10years 4months  | 675863    | PG II | 14.7 |
| female | 5years 4months   | 713598    | PG II | 9.0  |
| female | 12years 9months  | 502694    | PG II | 6.7  |
| female | 12years 5months  | 542784    | PG II | 16.4 |
| male   | 10years 7months  | 659995    | PG II | 10.9 |
| male   | 7years 10months  | 713637    | PG II | 10.6 |
| male   | 7years 10months  | 713618    | PG II | 5.2  |
| male   | 4years 8months   | 5919127-4 | PG II | 7.9  |
| male   | 3years           | 655953    | PG II | 9.1  |
| female | 2years 6months   | S32731    | PG II | 11.1 |
| male   | 1years 7months   | 7654544-3 | PG II | 7.7  |
| female | 5years 6months   | 713798    | PG II | 10.9 |
| male   | 10years 1months  | 694658    | PG II | 16.2 |
| male   | 2years 5months   | 7307918-3 | PG II | 10.7 |
| male   | 4years 3months   | 715056    | PG II | 5.3  |
| female | 3years 7months   | 715549    | PG II | 6.6  |
| male   | 6years 3months   | 715572    | PG II | 7.0  |
| male   | 7years 4months   | 4898744-4 | PG II | 8.1  |
| male   | 5years 4months   | 715807    | PG II | 6.3  |
| female | 10years 10months | 625862    | PG II | 7.2  |
| male   | 10years 8months  | 716070    | PG II | 8.1  |
| male   | 4years 3months   | 8186394-3 | PG II | 12.6 |
| male   | 7years 6months   | 716124    | PG II | 8.1  |
| female | 12years 8months  | 716150    | PG II | 8.1  |
| male   | 4years 8months   | 716148    | PG II | 9.3  |
| male   | 10years 4months  | 716176    | PG II | 7.5  |
| female | 13years 9months  | 716180    | PG II | 8.2  |
| female | 2months 7days    | 715854    | PG II | 14.0 |

|        |                  |           |       |       |
|--------|------------------|-----------|-------|-------|
| female | 10years          | 716200    | PG II | 17.5  |
| female | 6months 11days   | 715872    | PG II | 10.8  |
| male   | 7years 1months   | 716409    | PG II | 107.1 |
| male   | 6years 6months   | 716404    | PG II | 10.8  |
| female | 11years 11months | 716419    | PG II | 8.8   |
| male   | 6years 9months   | 716411    | PG II | 11.3  |
| male   | 9years 10months  | 715895    | PG II | 17.6  |
| female | 3years 5months   | 8196849-3 | PG II | 6.6   |
| male   | 13years 2months  | 696017    | PG II | 9.9   |
| male   | 8years 11months  | 715912    | PG II | 23.6  |
| male   | 11years 11months | 716460    | PG II | 7.1   |
| female | 11years 11months | 716516    | PG II | 16.9  |
| female | 10years          | 717790    | PG II | 13.9  |
| male   | 8years           | 716575    | PG II | 12.6  |
| male   | 9years 9months   | 717765    | PG II | 24.4  |
| male   | 12years 4months  | 717715    | PG II | 23.8  |
| male   | 9years 6months   | 716535    | PG II | 12.9  |
| male   | 10years 2months  | 613149    | PG II | 9.7   |
| male   | 2years 8months   | 7276330-3 | PG II | 11.7  |
| male   | 9years 6months   | 715999    | PG II | 8.5   |
| female | 7years 7months   | 717649    | PG II | 8.7   |
| male   | 10years 11months | 717672    | PG II | 24.5  |
| female | 6years 10months  | 717685    | PG II | 14.4  |
| female | 12years 2months  | 716802    | PG II | 17.4  |
| female | 7years           | 717432    | PG II | 9.4   |
| male   | 10years 7months  | 716871    | PG II | 7.9   |
| male   | 11years 10months | 698682    | PG II | 7.5   |
| male   | 2years 6months   | 640899    | PG II | 2.7   |
| male   | 7years 11months  | 717534    | PG II | 8.3   |
| male   | 7years 4months   | 717517    | PG II | 8.3   |
| female | 3years 3months   | 717543    | PG II | 8.0   |
| male   | 12years 11months | 294356    | PG II | 10.4  |
| female | 10years 3months  | 716963    | PG II | 23.1  |
| female | 8years 5months   | 716952    | PG II | 7.8   |
| male   | 9years 11months  | 716962    | PG II | 10.6  |
| female | 5years 8months   | 716977    | PG II | 8.2   |
| male   | 15years          | 4387581-2 | PG II | 6.3   |

|        |                 |           |       |      |
|--------|-----------------|-----------|-------|------|
| female | 13years 9months | 718159    | PG II | 5.4  |
| female | 7years 10months | 652867    | PG II | 9.0  |
| female | 5years          | 6527866-3 | PG II | 8.5  |
| male   | 5years 1months  | 717814    | PG II | 8.2  |
| female | 8years 8months  | 717296    | PG II | 12.6 |
| female | 2years 8months  | 7463603-3 | PG II | 8.3  |
| male   | 4years 2months  | 718751    | PG II | 7.0  |
| male   | 8years 10months | 647217    | PG II | 7.4  |
| female | 4years 11months | 5955434-3 | PG II | 6.4  |
| male   | 3years 9months  | 6475589-4 | PG II | 6.9  |
| male   | 3years 8months  | 7819203-4 | PG II | 9.7  |
| female | 13years 3months | 717390    | PG II | 6.1  |
| female | 7years 11months | 718484    | PG II | 8.9  |
| female | 8years 5months  | 718480    | PG II | 26.9 |
| male   | 13years 9months | 720005    | PG II | 6.2  |
| male   | 9years 4months  | 720749    | PG II | 22.4 |
| female | 6years 9months  | 720736    | PG II | 6.7  |
| female | 4years 10months | 698175    | PG II | 7.8  |
| male   | 12years 4months | 309900    | PG II | 38.7 |
| male   | 12years 8months | 720113    | PG II | 16.2 |
| male   | 10years 7months | 720139    | PG II | 10.9 |
| male   | 7years 1months  | 601355    | PG II | 14.6 |
| male   | 2years 1months  | 7519641-3 | PG II | 9.9  |
| male   | 2years 6months  | 7260329-3 | PG II | 10.9 |
| male   | 6years 6months  | 5824615-4 | PG II | 8.5  |
| male   | 10years         | 719930    | PG II | 16.5 |
| female | 7years 2months  | 442759    | PG II | 21.7 |
| female | 3years 2months  | 8245492-3 | PG II | 9.6  |
| male   | 3years 11months | 720462    | PG II | 16.7 |
| male   | 8years 6months  | 697736    | PG II | 7.8  |
| female | 3years 7months  | 8250774-3 | PG II | 7.5  |
| male   | 2years 8months  | 7961414-4 | PG II | 9.5  |
| male   | 2years 8months  | 7265954-3 | PG II | 38.2 |
| female | 6years 3months  | 473825    | PG II | 7.4  |
| female | 5years 3months  | 719642    | PG II | 36.3 |
| female | 10years 5months | 719655    | PG II | 8.3  |

|        |                  |           |       |      |
|--------|------------------|-----------|-------|------|
| male   | 11years 5months  | 684093    | PG II | 17.7 |
| female | 7years 7months   | 719209    | PG II | 11.5 |
| male   | 13years 9months  | 675811    | PG II | 13.5 |
| male   | 2years 1months   | 721400    | PG II | 4.5  |
| female | 9years 6months   | 721271    | PG II | 5.3  |
| male   | 10years 1months  | 6200477-4 | PG II | 9.3  |
| male   | 5years 6months   | 8193419-3 | PG II | 8.3  |
| male   | 7years 7months   | 380090    | PG II | 12.5 |
| female | 5years 9months   | 719796    | PG II | 9.4  |
| male   | 5years 5months   | 722144    | PG II | 11.3 |
| male   | 7years 10months  | 691011    | PG II | 11.2 |
| female | 3years 10months  | 6573022-4 | PG II | 5.0  |
| male   | 12years 5months  | 722138    | PG II | 7.9  |
| male   | 11years 6months  | 722387    | PG II | 17.6 |
| male   | 12years 3months  | 722363    | PG II | 10.7 |
| female | 7years 10months  | 722580    | PG II | 5.9  |
| female | 2years 9months   | 7463603-3 | PG II | 12.3 |
| male   | 12years 9months  | 719214    | PG II | 59.4 |
| female | 7years           | 712520    | PG II | 33.2 |
| female | 8years 5months   | 722541    | PG II | 17.5 |
| female | 13years 9months  | 722584    | PG II | 9.2  |
| male   | 13years 6months  | 719215    | PG II | 14.9 |
| female | 9years 5months   | 722668    | PG II | 10.8 |
| male   | 11years 7months  | 721915    | PG II | 12.4 |
| male   | 10months 2days   | 8296689-3 | PG II | 10.6 |
| female | 2years 8months   | 7492633-3 | PG II | 8.0  |
| female | 10years 9months  | 555302    | PG II | 7.3  |
| female | 3years 4months   | 723096    | PG II | 8.1  |
| male   | 2years 1months   | 7680487-3 | PG II | 10.6 |
| female | 12years 11months | 723520    | PG II | 8.1  |
| male   | 11years 8months  | 723139    | PG II | 7.7  |
| male   | 4years 6months   | 532101    | PG II | 9.3  |
| male   | 5years 11months  | 723482    | PG II | 6.8  |
| male   | 11years          | 723142    | PG II | 16.3 |
| female | 4years 11months  | 8289226-3 | PG II | 16.9 |
| male   | 5years 8months   | 8150202-3 | PG II | 7.0  |
| male   | 6years           | 451126    | PG II | 20.8 |

|        |                  |           |       |       |
|--------|------------------|-----------|-------|-------|
| male   | 3years 10months  | 636827    | PG II | 8.1   |
| female | 3years 11months  | 552562    | PG II | 8.3   |
| male   | 7years 4months   | 724335    | PG II | 9.8   |
| female | 14years          | 553622    | PG II | 8.1   |
| male   | 5years 1months   | 536438    | PG II | 13.7  |
| male   | 3years 3months   | 724374    | PG II | 5.8   |
| male   | 2years 8months   | 7061396-4 | PG II | 7.4   |
| female | 12years 1months  | 190308    | PG II | 7.4   |
| female | 8years 3months   | 716704    | PG II | 6.5   |
| male   | 10years 8months  | 724606    | PG II | 9.2   |
| female | 3years 4months   | 724665    | PG II | 10.7  |
| female | 12years 10months | 724685    | PG II | 22.2  |
| male   | 1years 8months   | 724694    | PG II | 8.2   |
| female | 12years 1months  | 191258    | PG II | 7.6   |
| male   | 9years 6months   | 725135    | PG II | 13.2  |
| male   | 10years          | 7826142-3 | PG II | 11.2  |
| female | 9years 9months   | 725396    | PG II | 7.0   |
| female | 5years 9months   | 725510    | PG II | 7.3   |
| male   | 4years 6months   | 6429528-4 | PG II | 18.9  |
| male   | 7years 4months   | 725674    | PG II | 11.5  |
| male   | 3years 6months   | 725684    | PG II | 7.5   |
| female | 5years 9months   | 725951    | PG II | 13.5  |
| male   | 12years 8months  | 725947    | PG II | 7.9   |
| male   | 2years 1months   | 725762    | PG II | 11.6  |
| male   | 2years           | 7817380-3 | PG II | 11.3  |
| male   | 6years 2months   | 725767    | PG II | 6.1   |
| male   | 5years 3months   | 725996    | PG II | 28.6  |
| female | 10years 2months  | 726222    | PG II | 6.8   |
| male   | 6years           | 726208    | PG II | 9.6   |
| male   | 3years 1months   | 726207    | PG II | 11.3  |
| male   | 5years 10months  | 726673    | PG II | 8.7   |
| male   | 8years 5months   | 727098    | PG II | 7.3   |
| male   | 10years 9months  | 727199    | PG II | 12.6  |
| female | 11years 1months  | 726836    | PG II | 133.2 |
| male   | 7years 9months   | 726835    | PG II | 109.8 |
| female | 10years 6months  | 362924    | PG II | 7.1   |
| male   | 7years           | 4653172-2 | PG II | 5.2   |
| female | 9months 27days   | 8373376-3 | PG II | 8.8   |
| male   | 9years 3months   | 727223    | PG II | 4.8   |

|        |                  |           |       |      |
|--------|------------------|-----------|-------|------|
| female | 3years 2months   | 726867    | PG II | 10.8 |
| male   | 8years 3months   | 727590    | PG II | 11.1 |
| male   | 9years 7months   | 727325    | PG II | 11.8 |
| female | 3years 4months   | 8245492-3 | PG II | 10.3 |
| male   | 8years 8months   | 388791    | PG II | 16.0 |
| male   | 3years 8months   | 7128005-2 | PG II | 6.4  |
| female | 3years 4months   | 727747    | PG II | 13.7 |
| male   | 5years 4months   | 727784    | PG II | 12.1 |
| female | 1years 11months  | 8075811-4 | PG II | 12.7 |
| male   | 3months 5days    | 8384623-3 | PG II | 7.6  |
| male   | 13years 5months  | 727436    | PG II | 12.4 |
| male   | 1months 10days   | 728146    | PG II | 16.6 |
| female | 9years 1months   | 728173    | PG II | 7.4  |
| female | 8years 2months   | 728163    | PG II | 12.3 |
| male   | 15years          | 728150    | PG II | 13.0 |
| female | 13years 8months  | 728227    | PG II | 9.3  |
| female | 4years 7months   | 714058    | PG II | 14.1 |
| female | 13years 4months  | 728309    | PG II | 8.9  |
| male   | 7years 9months   | 727884    | PG II | 9.0  |
| female | 7years           | 728905    | PG II | 7.8  |
| female | 10years 9months  | 728907    | PG II | 9.5  |
| male   | 7years 10months  | 728843    | PG II | 24.7 |
| male   | 9years 7months   | 728840    | PG II | 8.1  |
| male   | 5years           | 729286    | PG II | 10.0 |
| male   | 1years 7months   | 728889    | PG II | 17.9 |
| male   | 7years 6months   | 727465    | PG II | 9.6  |
| female | 9years           | 651644    | PG II | 17.6 |
| female | 9years 2months   | 729062    | PG II | 5.3  |
| male   | 12years 7months  | 729493    | PG II | 14.4 |
| male   | 12years 11months | 656823    | PG II | 17.1 |
| male   | 12years 6months  | 728451    | PG II | 30.8 |
| male   | 8years 11months  | 728436    | PG II | 8.9  |
| female | 11years          | 728420    | PG II | 8.8  |
| female | 10years 6months  | 691969    | PG II | 14.0 |
| female | 2years 10months  | 7912616-3 | PG II | 8.3  |
| female | 8years 10months  | 728520    | PG II | 13.0 |
| female | 6years 7months   | 596651    | PG II | 13.1 |

|        |                  |           |       |      |
|--------|------------------|-----------|-------|------|
| male   | 6years 8months   | 729537    | PG II | 7.0  |
| male   | 10years 3months  | 719930    | PG II | 21.0 |
| male   | 7years 9months   | 707330    | PG II | 10.8 |
| male   | 5years 4months   | 728697    | PG II | 9.1  |
| male   | 6years 8months   | 729565    | PG II | 27.6 |
| male   | 13years          | 728619    | PG II | 35.7 |
| male   | 15years          | 728742    | PG II | 9.7  |
| female | 13years 6months  | 728758    | PG II | 9.7  |
| male   | 12years 9months  | 728721    | PG II | 7.5  |
| male   | 2years 5months   | 8406053-3 | PG II | 13.3 |
| female | 1years 10months  | 7599769-3 | PG II | 10.0 |
| male   | 3months 10days   | 721024    | PG II | 9.3  |
| female | 8months          | 8034739-2 | PG II | 11.5 |
| male   | 12years 9months  | 729654    | PG II | 12.6 |
| male   | 13years 10months | 729823    | PG II | 12.4 |
| female | 10years          | 729810    | PG II | 12.8 |
| male   | 10years 11months | 729880    | PG II | 19.9 |
| male   | 9years 9months   | 729879    | PG II | 22.7 |
| female | 1years 10months  | 7599769-3 | PG II | 11.3 |
| male   | 10years          | 729882    | PG II | 33.3 |
| male   | 6years 6months   | 729856    | PG II | 11.5 |
| female | 6years 4months   | 6872972-4 | PG II | 9.8  |
| female | 11years 11months | 729959    | PG II | 9.0  |
| female | 13years 3months  | 730049    | PG II | 12.1 |
| male   | 6years 9months   | 729724    | PG II | 13.1 |
| female | 8years 10months  | 729736    | PG II | 4.4  |
| female | 5years 8months   | 729731    | PG II | 10.2 |
| male   | 9years 3months   | 721651    | PG II | 15.7 |
| male   | 10years 2months  | 390956    | PG II | 16.6 |
| male   | 9years 3months   | 730065    | PG II | 10.1 |
| female | 6years 9months   | 730196    | PG II | 6.6  |
| female | 6years 10months  | 624668    | PG II | 12.1 |
| male   | 8years 1months   | 8421631-3 | PG II | 10.2 |
| female | 5years 8months   | 730593    | PG II | 12.6 |
| female | 13years 9months  | 730235    | PG II | 11.2 |
| male   | 3years 5months   | 8312992-3 | PG II | 9.9  |



|        |                  |           |       |      |
|--------|------------------|-----------|-------|------|
| male   | 1years 6months   | 7646202-4 | PG II | 10.9 |
| female | 4years 2months   | 730258    | PG II | 12.3 |
| male   | 13years 4months  | 8433502-3 | PG II | 10.8 |
| male   | 11years 2months  | 730771    | PG II | 6.7  |
| male   | 1years 11months  | 7623734-3 | PG II | 8.0  |
| female | 1years 2months   | 8394720-3 | PG II | 7.0  |
| male   | 8years 5months   | 730311    | PG II | 4.7  |
| male   | 6years 7months   | 494659    | PG II | 30.1 |
| female | 7years 10months  | 730957    | PG II | 16.1 |
| female | 13years 10months | 730327    | PG II | 7.7  |
| female | 9years 11months  | 731065    | PG II | 12.8 |
| female | 11years 9months  | 730336    | PG II | 13.1 |
| male   | 14years          | 730342    | PG II | 10.6 |
| female | 6years 2months   | 8418291-3 | PG II | 11.0 |
| male   | 5years 11months  | 6697958-3 | PG II | 5.5  |
| female | 12years 10months | 7189014-4 | PG II | 7.5  |
| male   | 9years 10months  | 731092    | PG II | 17.7 |
| male   | 11years 2months  | 8434477-3 | PG II | 7.6  |
| male   | 2years 5months   | 7420070-3 | PG II | 7.9  |
| female | 11years 6months  | 658313    | PG II | 7.6  |
| male   | 6years 5months   | 731237    | PG II | 14.2 |
| male   | 8years 10months  | 731175    | PG II | 8.9  |
| female | 6years 11months  | 731172    | PG II | 8.4  |
| male   | 10years 10months | 252827    | PG II | 10.5 |
| male   | 8years 8months   | 731674    | PG II | 27.1 |
| male   | 7years 2months   | 731676    | PG II | 7.9  |
| male   | 10months 23days  | 7991515-4 | PG II | 15.7 |
| male   | 1years 11months  | 731690    | PG II | 13.2 |
| female | 8years 5months   | 602551    | PG II | 4.4  |

|        |                  |           |       |      |
|--------|------------------|-----------|-------|------|
| male   | 6months 28days   | 707191    | PG II | 17.3 |
| male   | 10years 9months  | 731683    | PG II | 9.2  |
| male   | 1years 5months   | 7855707-3 | PG II | 13.0 |
| male   | 11years 11months | 731471    | PG II | 25.3 |
| female | 3years 5months   | 7264330-3 | PG II | 15.9 |
| female | 12years 8months  | 731845    | PG II | 12.1 |
| male   | 10years 1months  | 576654    | PG II | 11.9 |
| male   | 13years 11months | 707320    | PG II | 7.5  |
| male   | 11years 6months  | 731822    | PG II | 7.8  |
| female | 5years 9months   | 658542    | PG II | 11.3 |
| male   | 8years 1months   | 731193    | PG II | 12.2 |
| male   | 12years 11months | 8179946-3 | PG II | 11.9 |
| female | 10years          | 731542    | PG II | 6.1  |
| female | 15years          | 731536    | PG II | 9.5  |
| male   | 4years 1months   | 731205    | PG II | 11.9 |
| female | 4years 2months   | 649987    | PG II | 12.6 |
| female | 12years 8months  | 8445510-3 | PG II | 8.2  |
| male   | 6years 6months   | 498160    | PG II | 7.8  |
| male   | 5years 1months   | 6941026-3 | PG II | 10.9 |
| female | 10years 10months | 731579    | PG II | 7.7  |
| male   | 15years          | 732015    | PG II | 13.2 |
| male   | 10years 9months  | 732048    | PG II | 20.6 |
| male   | 5years 2months   | 732056    | PG II | 7.0  |
| female | 7years 1months   | 707313    | PG II | 9.1  |
| male   | 4years 8months   | 7487699-3 | PG II | 8.1  |
| male   | 1years 9months   | 7637653-3 | PG II | 9.8  |
| male   | 7years 11months  | 732524    | PG II | 12.0 |
| female | 12years 8months  | 732590    | PG II | 14.7 |
| male   | 2years 1months   | 7799240-3 | PG II | 9.8  |
| female | 3years 3months   | 6931288-4 | PG II | 8.0  |
| male   | 15years          | 343771    | PG II | 18.5 |

|        |                 |           |       |      |
|--------|-----------------|-----------|-------|------|
| male   | 5years 4months  | 732143    | PG II | 11.2 |
| male   | 1years 8months  | 7726108-3 | PG II | 7.7  |
| male   | 10months 4days  | 8048694-3 | PG II | 7.5  |
| female | 7years 7months  | 732781    | PG II | 12.8 |
| female | 8years 3months  | 732783    | PG II | 10.5 |
| female | 4years 11months | 6200051-4 | PG II | 9.8  |
| male   | 5years 11months | 7694017-4 | PG II | 7.2  |
| female | 11months 2days  | 8183151-3 | PG II | 10.6 |
| female | 4years 7months  | 8460514-3 | PG II | 7.0  |
| male   | 1years 9months  | 8455388-3 | PG II | 8.3  |
| female | 1years 4months  | 7873322-3 | PG II | 9.4  |
| female | 5years 10months | 8459555-3 | PG II | 10.6 |
| male   | 9years 1months  | 732837    | PG II | 11.9 |
| male   | 10years 3months | 732197    | PG II | 7.4  |
| male   | 5months 19days  | 732847    | PG II | 31.0 |
| male   | 4years 5months  | 733019    | PG II | 9.7  |
| female | 9years 3months  | 732885    | PG II | 18.7 |
| female | 11years         | 732921    | PG II | 9.7  |
| male   | 8years 11months | 733026    | PG II | 8.4  |
| female | 10years 3months | 4695509-4 | PG II | 9.0  |
| female | 7years 3months  | 6876049-4 | PG II | 9.2  |
| male   | 7years 2months  | 732993    | PG II | 8.7  |
| female | 10years 9months | 733743    | PG II | 16.2 |
| female | 6years 5months  | 733063    | PG II | 10.3 |
| female | 6years 2months  | 733710    | PG II | 10.8 |
| male   | 8years 6months  | 7187533-4 | PG II | 10.1 |
| male   | 6years 8months  | 8456017-3 | PG II | 12.6 |
| female | 2years 1months  | 8426004-3 | PG II | 7.6  |
| male   | 5years 7months  | 5841341-4 | PG II | 8.9  |
| female | 5years 3months  | 6472410-4 | PG II | 6.6  |
| female | 9years 11months | 7937771-3 | PG II | 8.2  |
| female | 6years 5months  | 5832976-4 | PG II | 7.5  |
| female | 4years          | 733661    | PG II | 7.6  |
| male   | 8years 11months | 733098    | PG II | 61.1 |
| male   | 8years 8months  | 733784    | PG II | 6.3  |
| male   | 9years 4months  | 733114    | PG II | 11.3 |
| female | 1months 25days  | 733621    | PG II | 12.8 |
| male   | 10years 4months | 734069    | PG II | 7.7  |

|        |                  |           |       |      |
|--------|------------------|-----------|-------|------|
| male   | 13years          | 734063    | PG II | 7.1  |
| female | 12years 11months | 734048    | PG II | 11.0 |
| male   | 12years 6months  | 733674    | PG II | 9.7  |
| female | 4years 6months   | 8088411-3 | PG II | 13.0 |
| male   | 7months 5days    | 8418143-3 | PG II | 10.2 |
| female | 4years 11months  | 6542937-3 | PG II | 11.6 |
| female | 9years 10months  | 731489    | PG II | 9.3  |
| female | 4years 4months   | 585144    | PG II | 5.4  |
| male   | 7years 5months   | 606132    | PG II | 12.2 |
| male   | 10years 7months  | 734217    | PG II | 12.7 |
| female | 7years 7months   | 734244    | PG II | 14.7 |
| female | 6years 8months   | 733841    | PG II | 5.8  |
| female | 6years           | 5294162-4 | PG II | 13.7 |
| male   | 5years 8months   | 733889    | PG II | 6.4  |
| female | 9years 4months   | 734336    | PG II | 7.9  |
| female | 12years 9months  | 8445510-3 | PG II | 19.4 |
| male   | 12years 9months  | 734363    | PG II | 16.3 |
| male   | 9years 3months   | 702607    | PG II | 11.0 |
| male   | 3years 9months   | 575069    | PG II | 9.9  |
| male   | 7years 10months  | 734482    | PG II | 8.8  |
| male   | 2years 8months   | 733916    | PG II | 27.6 |
| female | 10months 8days   | 8476209-3 | PG II | 8.2  |
| male   | 5years 2months   | 6501135-3 | PG II | 4.9  |
| male   | 6months 2days    | 8308766-3 | PG II | 7.9  |
| female | 2years 6months   | 7391971-4 | PG II | 7.9  |
| male   | 10years 6months  | 734647    | PG II | 22.0 |
| male   | 4years 6months   | 733951    | PG II | 12.2 |
| female | 5years 3months   | 734656    | PG II | 9.1  |
| male   | 12years 11months | 734637    | PG II | 17.4 |
| male   | 2years 1months   | 8480386-3 | PG II | 9.6  |

|        |                  |           |       |      |
|--------|------------------|-----------|-------|------|
| male   | 7years 11months  | 707330    | PG II | 21.8 |
| female | 11years 8months  | 734764    | PG II | 7.1  |
| male   | 12years 5months  | 478812    | PG II | 11.8 |
| male   | 2years 4months   | 733985    | PG II | 14.8 |
| male   | 12years 1months  | 735006    | PG II | 20.1 |
| male   | 8years 7months   | 735027    | PG II | 8.4  |
| female | 6years 6months   | 735044    | PG II | 10.9 |
| female | 6years 10months  | 735048    | PG II | 20.1 |
| male   | 11years          | 480839    | PG II | 13.4 |
| male   | 8years 5months   | 734590    | PG II | 35.7 |
| female | 15years          | 728809    | PG II | 10.1 |
| male   | 8years 11months  | 735116    | PG II | 12.8 |
| male   | 3years 8months   | 733139    | PG II | 6.0  |
| male   | 11years 5months  | 735162    | PG II | 8.0  |
| male   | 9years 7months   | 735135    | PG II | 9.0  |
| male   | 10years 5months  | 735071    | PG II | 9.7  |
| female | 4years           | 6597952-4 | PG II | 10.0 |
| male   | 5years 5months   | 8486502-3 | PG II | 10.7 |
| male   | 5years 5months   | 6752056-3 | PG II | 7.6  |
| male   | 8years 5months   | 734590    | PG II | 15.6 |
| female | 10years 1months  | 6742204-4 | PG II | 18.1 |
| male   | 8years 11months  | 735202    | PG II | 12.3 |
| female | 7years 5months   | 4500735-4 | PG II | 10.8 |
| male   | 10years 10months | 696440    | PG II | 5.3  |
| female | 3years 11months  | 6723721-3 | PG II | 6.3  |
| female | 12years 9months  | 8450518-3 | PG II | 13.4 |
| male   | 2years 4months   | 7500338-3 | PG II | 7.3  |
| male   | 11years 11months | 7314337-4 | PG II | 8.2  |
| male   | 1years 5months   | 7757173-3 | PG II | 5.4  |

|        |                  |           |       |      |
|--------|------------------|-----------|-------|------|
| male   | 4years 5months   | 6317689-3 | PG II | 9.7  |
| female | 4years 3months   | 8481407-3 | PG II | 5.1  |
| male   | 8months 13days   | 8484105-4 | PG II | 10.8 |
| female | 9years 5months   | 735331    | PG II | 17.5 |
| male   | 8years 9months   | 485993    | PG II | 17.6 |
| female | 5years 4months   | 5955434-3 | PG II | 6.7  |
| male   | 15years          | 8489704-3 | PG II | 9.6  |
| female | 6years 2months   | 8396749-3 | PG II | 9.3  |
| male   | 3years 3months   | 6976160-4 | PG II | 7.7  |
| male   | 11years 4months  | 6913208-4 | PG II | 10.3 |
| female | 2years 2months   | 7958609-4 | PG II | 8.9  |
| male   | 5years 7months   | 7036522-4 | PG II | 7.2  |
| male   | 9years 11months  | 734930    | PG II | 7.3  |
| male   | 10years 4months  | 735360    | PG II | 8.8  |
| female | 12years 6months  | 565555    | PG II | 4.0  |
| female | 5years 10months  | 735356    | PG II | 9.5  |
| male   | 7years 6months   | 4758925-4 | PG II | 9.1  |
| male   | 2years           | 8488316-3 | PG II | 10.9 |
| female | 5years 1months   | 734969    | PG II | 5.3  |
| male   | 8years 3months   | 671524    | PG II | 8.0  |
| female | 14years          | 709824    | PG II | 17.4 |
| female | 8years 9months   | 736602    | PG II | 5.7  |
| female | 12years 11months | 735586    | PG II | 11.5 |
| male   | 4years 3months   | 736663    | PG II | 6.4  |
| male   | 13years          | 735633    | PG II | 13.4 |
| female | 11years          | 735628    | PG II | 7.6  |
| male   | 8years 7months   | 735640    | PG II | 5.3  |
| male   | 4years 4months   | 8469850-3 | PG II | 10.3 |
| female | 4years 8months   | 736624    | PG II | 8.4  |
| male   | 1years 11months  | 7700335-3 | PG II | 13.7 |

|        |                  |           |       |      |
|--------|------------------|-----------|-------|------|
| female | 9years 10months  | 735717    | PG II | 9.8  |
| female | 6years 3months   | 8393264-3 | PG II | 11.4 |
| female | 9years 1months   | 735725    | PG II | 10.5 |
| female | 7years 8months   | 736671    | PG II | 8.4  |
| male   | 4years 1months   | 7854420-3 | PG II | 6.5  |
| female | 3years 5months   | 7406575-2 | PG II | 7.8  |
| male   | 14years          | 735803    | PG II | 7.4  |
| female | 12years 3months  | 8498295-4 | PG II | 10.3 |
| female | 7years 4months   | 735825    | PG II | 7.8  |
| female | 5years 7months   | 8014305-3 | PG II | 6.8  |
| male   | 3years 11months  | 6902535-3 | PG II | 7.1  |
| female | 2years 7months   | 8111330-3 | PG II | 10.8 |
| male   | 7years 8months   | 453911    | PG II | 9.1  |
| male   | 11years 10months | 735915    | PG II | 24.6 |
| female | 11years 8months  | 735940    | PG II | 8.8  |
| female | 5years           | 736699    | PG II | 10.0 |
| female | 11years 4months  | 736694    | PG II | 5.9  |
| male   | 4years 9months   | 735950    | PG II | 12.4 |
| male   | 4years           | 735853    | PG II | 7.1  |
| female | 5years 7months   | 8130585-3 | PG II | 13.2 |
| male   | 2years 2months   | 8497597-3 | PG II | 7.2  |
| male   | 2years 1months   | 8027591-3 | PG II | 8.3  |
| female | 5years 6months   | 6088101-4 | PG II | 9.5  |
| male   | 5months 6days    | 8460775-3 | PG II | 11.0 |
| male   | 10months 16days  | 7993048-4 | PG II | 5.2  |
| female | 5years 5months   | 736021    | PG II | 8.3  |
| male   | 5years 6months   | 735997    | PG II | 9.9  |
| male   | 4years 2months   | 736055    | PG II | 7.6  |
| female | 5years 6months   | 736051    | PG II | 5.9  |
| female | 8years 1months   | 736722    | PG II | 6.6  |
| female | 5years 7months   | 7883401-3 | PG II | 7.0  |
| female | 2years 3months   | 7530394-4 | PG II | 6.5  |
| female | 13years 10months | 736131    | PG II | 9.3  |
| male   | 11years 11months | 736134    | PG II | 23.0 |

|        |                  |           |       |      |
|--------|------------------|-----------|-------|------|
| male   | 9years 4months   | 432226    | PG II | 7.1  |
| female | 9years 5months   | 694899    | PG II | 10.0 |
| male   | 10years 6months  | 736125    | PG II | 9.3  |
| male   | 3years 9months   | 690876    | PG II | 14.0 |
| female | 10years 6months  | 736156    | PG II | 4.7  |
| male   | 9years 2months   | 736179    | PG II | 12.3 |
| male   | 12years          | 736177    | PG II | 7.5  |
| female | 10years 8months  | 736367    | PG II | 8.0  |
| male   | 8years 8months   | 736264    | PG II | 14.8 |
| female | 12years 7months  | 565555    | PG II | 8.6  |
| male   | 2years 2months   | 7564282-3 | PG II | 9.0  |
| female | 10years 9months  | 736344    | PG II | 12.0 |
| female | 3years 9months   | 575086    | PG II | 10.6 |
| male   | 3years 8months   | 736243    | PG II | 11.0 |
| male   | 11years 3months  | 736287    | PG II | 12.1 |
| male   | 1years 5months   | 7816190-3 | PG II | 9.1  |
| male   | 10years 3months  | 736396    | PG II | 7.1  |
| male   | 8years 4months   | 697483    | PG II | 7.4  |
| female | 7years 11months  | 737023    | PG II | 10.3 |
| male   | 3years 3months   | 8228576-3 | PG II | 10.1 |
| male   | 11years          | 736443    | PG II | 9.2  |
| male   | 8years 9months   | 737083    | PG II | 10.4 |
| male   | 10years 1months  | 291093    | PG II | 8.3  |
| male   | 8years 7months   | 737087    | PG II | 8.3  |
| female | 5years 4months   | 651754    | PG II | 11.8 |
| male   | 10years 4months  | 573721    | PG II | 11.1 |
| male   | 7years 1months   | 5999584-3 | PG II | 10.8 |
| male   | 1years 5months   | 7809233-3 | PG II | 12.1 |
| male   | 10years          | 737204    | PG II | 42.6 |
| female | 14years          | 737220    | PG II | 5.4  |
| male   | 7years 3months   | 418580    | PG II | 8.2  |
| female | 3months 18days   | 737251    | PG II | 23.2 |
| female | 11years 8months  | 8506663-3 | PG II | 6.8  |
| male   | 12years 7months  | 737435    | PG II | 18.8 |
| male   | 9years 9months   | 737357    | PG II | 6.5  |
| male   | 10years 10months | 737376    | PG II | 8.8  |



|        |                  |           |       |      |
|--------|------------------|-----------|-------|------|
| male   | 9years 9months   | 737438    | PG II | 14.7 |
| male   | 4years           | 736539    | PG II | 5.4  |
| male   | 10years          | 737486    | PG II | 9.6  |
| male   | 7years 10months  | 737479    | PG II | 9.0  |
| female | 7years 1months   | 737491    | PG II | 15.9 |
| male   | 5years 2months   | 737499    | PG II | 12.2 |
| male   | 4years 4months   | 736506    | PG II | 14.2 |
| male   | 7years 4months   | 737474    | PG II | 4.8  |
| male   | 9years 8months   | 513246    | PG II | 13.8 |
| female | 15years          | 656848    | PG II | 6.5  |
| female | 11years 6months  | 437867    | PG II | 12.5 |
| male   | 1years 7months   | 8002534-3 | PG II | 10.8 |
| female | 15years          | 736898    | PG II | 9.2  |
| male   | 5years 1months   | 736822    | PG II | 10.2 |
| female | 14years          | 737627    | PG II | 20.5 |
| male   | 9years 9months   | 704315    | PG II | 12.0 |
| male   | 7years 3months   | 7340966-4 | PG II | 8.2  |
| male   | 1years 7months   | 8422909-3 | PG II | 8.6  |
| female | 4years 11months  | 8253258-3 | PG II | 8.5  |
| male   | 10years 10months | 737743    | PG II | 7.5  |
| male   | 11years 9months  | 737638    | PG II | 23.4 |
| male   | 10years 8months  | 737766    | PG II | 10.1 |
| male   | 3years 2months   | 7657166-3 | PG II | 4.1  |
| male   | 2years 1months   | 8079167-3 | PG II | 7.3  |
| male   | 9years 1months   | 738283    | PG II | 13.3 |
| female | 12years          | 737642    | PG II | 9.0  |
| male   | 9years 11months  | 593589    | PG II | 12.6 |
| male   | 8years 4months   | 738281    | PG II | 23.2 |
| male   | 6years 11months  | 738273    | PG II | 8.0  |
| female | 5years 9months   | 738357    | PG II | 19.7 |

|        |                  |           |       |      |
|--------|------------------|-----------|-------|------|
| male   | 5years           | 738317    | PG II | 8.1  |
| female | 7years 4months   | 738340    | PG II | 10.8 |
| male   | 7years           | 8252647-3 | PG II | 18.9 |
| male   | 1years 11months  | 8484247-3 | PG II | 12.6 |
| male   | 1years 9months   | 8099745-3 | PG II | 9.5  |
| female | 1years 5months   | 7887432-3 | PG II | 11.1 |
| male   | 1years           | 738392    | PG II | 12.6 |
| male   | 9years 8months   | 685471    | PG II | 40.6 |
| male   | 1years 9months   | 738051    | PG II | 32.9 |
| female | 6years 4months   | 5912675-3 | PG II | 7.8  |
| male   | 7years 6months   | 733900    | PG II | 8.8  |
| female | 1years 5months   | 738138    | PG II | 6.1  |
| female | 11months 13days  | 8524726-3 | PG II | 9.2  |
| female | 2years 9months   | 7827089-3 | PG II | 11.7 |
| male   | 8years 9months   | 738453    | PG II | 30.5 |
| male   | 6years 8months   | 5673322-4 | PG II | 11.9 |
| male   | 3years 5months   | 8527333-3 | PG II | 10.2 |
| male   | 10years 7months  | 738519    | PG II | 6.7  |
| female | 9years 6months   | 8377981-3 | PG II | 15.8 |
| male   | 10years 1months  | 738808    | PG II | 7.7  |
| male   | 10years          | 738517    | PG II | 9.0  |
| female | 4years 10months  | 737948    | PG II | 6.0  |
| male   | 11years 8months  | 287417    | PG II | 15.3 |
| female | 4years           | 566186    | PG II | 5.2  |
| female | 10years 11months | 737919    | PG II | 19.1 |
| female | 9years 8months   | 699561    | PG II | 13.3 |
| male   | 5years 3months   | 8484577-3 | PG II | 9.5  |
| male   | 6years 10months  | 738628    | PG II | 12.0 |
| male   | 8years 1months   | 737996    | PG II | 15.3 |
| female | 5years 4months   | 8539935-3 | PG II | 10.2 |

|        |                 |           |       |      |
|--------|-----------------|-----------|-------|------|
| male   | 3years 11months | 7208827-3 | PG II | 9.9  |
| female | 7years 10months | 4890630-4 | PG II | 6.7  |
| male   | 1years          | 696058    | PG II | 6.1  |
| female | 1years 11months | 7664077-3 | PG II | 9.4  |
| female | 4years          | 739552    | PG II | 9.6  |
| female | 8years 7months  | 739505    | PG II | 19.2 |
| female | 11years 2months | 739485    | PG II | 15.8 |
| male   | 4years 10months | 739487    | PG II | 11.5 |
| female | 13years 4months | 519441    | PG II | 36.2 |
| male   | 1years          | 8064035-3 | PG II | 8.8  |
| male   | 1years          | 8070611-3 | PG II | 10.3 |
| male   | 10years 7months | 739629    | PG II | 7.8  |
| male   | 10years 9months | 738741    | PG II | 8.2  |
| male   | 3years 2months  | 739663    | PG II | 39.5 |
| male   | 1years 1months  | 8542347-3 | PG II | 10.2 |
| female | 1years 6months  | 8461780-3 | PG II | 9.2  |
| female | 5years 2months  | 8549086-3 | PG II | 14.7 |
| male   | 11years 3months | 738796    | PG II | 22.5 |
| male   | 6years 8months  | 681046    | PG II | 15.5 |
| male   | 9years 1months  | 739763    | PG II | 26.1 |
| male   | 1years 6months  | 7844749-3 | PG II | 9.9  |
| female | 3years 10months | 7061283-3 | PG II | 5.7  |
| female | 4years 2months  | 739832    | PG II | 6.0  |
| male   | 4years 3months  | 8176924-4 | PG II | 11.2 |
| male   | 5years 9months  | 740018    | PG II | 11.5 |
| male   | 1years 5months  | 7857562-3 | PG II | 11.8 |
| male   | 2years 1months  | 7669455-3 | PG II | 8.0  |
| male   | 3years 5months  | 6996721-4 | PG II | 7.3  |
| female | 8years 3months  | 739840    | PG II | 16.5 |
| male   | 12years 9months | 739860    | PG II | 21.2 |
| male   | 5years          | 687670    | PG II | 7.4  |
| male   | 9years 9months  | 740028    | PG II | 11.4 |
| female | 3years 6months  | 740128    | PG II | 6.2  |
| female | 9years 6months  | 740095    | PG II | 12.2 |
| male   | 2years 11months | 699979    | PG II | 7.0  |
| male   | 13years 8months | 739883    | PG II | 18.3 |

|        |                 |           |       |      |
|--------|-----------------|-----------|-------|------|
| male   | 9years 9months  | 739917    | PG II | 7.0  |
| female | 4years 10months | 740256    | PG II | 9.2  |
| male   | 8years 11months | 740263    | PG II | 13.6 |
| male   | 1years 8months  | 8002534-3 | PG II | 9.4  |
| female | 2years 1months  | 7826198-3 | PG II | 11.7 |
| male   | 8years 10months | 740368    | PG II | 11.7 |
| male   | 8years 5months  | 740318    | PG II | 9.5  |
| female | 5years 8months  | 740348    | PG II | 15.7 |
| female | 4years 6months  | 8481743-3 | PG II | 10.0 |
| female | 8years 2months  | 372345    | PG II | 25.2 |
| female | 6years 9months  | 740428    | PG II | 13.7 |
| male   | 11years 9months | 739969    | PG II | 20.1 |
| female | 11years 3months | 555302    | PG II | 10.6 |
| male   | 10years 3months | 740533    | PG II | 9.4  |
| male   | 11years 9months | 740517    | PG II | 83.3 |
| male   | 1years 3months  | 740463    | PG II | 7.2  |
| female | 10years 8months | 740581    | PG II | 14.4 |
| male   | 10years 6months | 716969    | PG II | 27.4 |
| male   | 5years          | 714459    | PG II | 7.2  |
| male   | 7years 2months  | 8386167-2 | PG II | 8.6  |
| female | 2years          | 8397473-3 | PG II | 6.0  |
| male   | 4years 8months  | 740607    | PG II | 7.9  |
| male   | 3years          | 7528499-3 | PG II | 6.4  |
| male   | 5years 3months  | 530024    | PG II | 6.3  |
| female | 4years 5months  | 740781    | PG II | 8.7  |
| female | 9years 8months  | 740782    | PG II | 7.4  |
| male   | 8years 9months  | 740830    | PG II | 8.8  |
| female | 10years 1months | 318909    | PG II | 9.1  |
| female | 8years 10months | 6923614-4 | PG II | 5.1  |
| male   | 4years 7months  | 6310951-2 | PG II | 11.9 |
| female | 2years 10months | 8151430-3 | PG II | 8.1  |
| male   | 7years 3months  | 740928    | PG II | 9.9  |
| male   | 7years 10months | 445834    | PG II | 15.9 |
| male   | 9years 6months  | 739990    | PG II | 8.0  |
| female | 11years 9months | 741476    | PG II | 33.5 |
| female | 4years 5months  | 8562509-3 | PG II | 9.2  |

|        |                  |           |       |      |
|--------|------------------|-----------|-------|------|
| female | 10years 2months  | 8563456-3 | PG II | 7.7  |
| male   | 8years 5months   | 8566119-4 | PG II | 11.9 |
| female | 2years 7months   | 8562491-3 | PG II | 6.1  |
| male   | 3years           | 7157809-2 | PG II | 28.0 |
| male   | 8years 1months   | 7317065-3 | PG II | 9.7  |
| female | 2years           | 8483891-3 | PG II | 13.8 |
| male   | 11years 4months  | 741012    | PG II | 16.9 |
| female | 8years 10months  | 740623    | PG II | 5.9  |
| male   | 3years 2months   | 7905171-3 | PG II | 11.4 |
| male   | 12years 10months | 5807995-3 | PG II | 10.5 |
| female | 5years 3months   | 7549931-3 | PG II | 8.3  |
| male   | 11years 10months | 741528    | PG II | 6.6  |
| female | 11years 2months  | 741098    | PG II | 8.6  |
| male   | 10years 4months  | 741120    | PG II | 26.6 |
| male   | 6years 10months  | 451260    | PG II | 12.2 |
| male   | 1years 6months   | 7928194-3 | PG II | 12.4 |
| male   | 7years 3months   | 7935946-3 | PG II | 6.5  |
| male   | 3years 1months   | 8066108-3 | PG II | 13.1 |
| female | 9years 11months  | 7606822-3 | PG II | 9.0  |
| male   | 6years 3months   | 615850    | PG II | 25.8 |
| female | 11years 4months  | 741153    | PG II | 16.0 |
| male   | 10years 6months  | 8571456-4 | PG II | 12.1 |
| male   | 2years 5months   | 8564437-3 | PG II | 6.3  |
| female | 6years 3months   | 741604    | PG II | 21.9 |
| male   | 9years 2months   | 4684142-4 | PG II | 14.7 |
| male   | 5years 3months   | 8539342-3 | PG II | 7.8  |
| male   | 15years          | 6349450-4 | PG II | 15.9 |
| male   | 13years 5months  | 3425684-4 | PG II | 11.4 |
| male   | 7years 8months   | 7269704-4 | PG II | 8.0  |
| male   | 10years 1months  | 8570761-3 | PG II | 7.4  |
| female | 13years 8months  | 7216644-4 | PG II | 7.1  |
| female | 2years 3months   | 7806898-3 | PG II | 6.5  |
| male   | 12years 11months | 8355854-3 | PG II | 7.7  |
| female | 1years 11months  | 741804    | PG II | 10.2 |

|        |                  |           |       |      |
|--------|------------------|-----------|-------|------|
| male   | 13years 10months | 741599    | PG II | 10.3 |
| male   | 4years 7months   | 741211    | PG II | 11.7 |
| male   | 10years 4months  | 741812    | PG II | 10.3 |
| male   | 9years 5months   | 320132    | PG II | 15.3 |
| male   | 8years 2months   | 5875206-3 | PG II | 8.7  |
| female | 6years 1months   | 741201    | PG II | 9.0  |
| female | 9years 3months   | 7706671-3 | PG II | 7.1  |
| female | 7years 11months  | 5716282-4 | PG II | 8.4  |
| male   | 4years 6months   | 6752916-3 | PG II | 7.6  |
| male   | 8years 3months   | 8566786-3 | PG II | 6.1  |
| female | 1years 6months   | 8572705-3 | PG II | 5.3  |
| male   | 10years 1months  | 737204    | PG II | 33.3 |
| male   | 1years           | 8071229-3 | PG II | 9.3  |
| male   | 10years 6months  | 741915    | PG II | 4.7  |
| male   | 1years 10months  | 8234743-3 | PG II | 9.4  |
| male   | 7years 5months   | 7061771-4 | PG II | 8.4  |
| female | 5years 6months   | 7853104-3 | PG II | 10.3 |
| female | 9years 8months   | 8038114-3 | PG II | 6.0  |
| female | 6years 10months  | 5814599-3 | PG II | 6.7  |
| male   | 12years 4months  | 4460404-4 | PG II | 12.5 |
| female | 9months 22days   | 8393940-3 | PG II | 10.9 |
| female | 10years 9months  | 741953    | PG II | 8.0  |
| female | 9years 11months  | 741975    | PG II | 23.7 |
| male   | 6years 10months  | 741989    | PG II | 7.4  |
| female | 9years 2months   | 741986    | PG II | 8.5  |
| female | 6years 5months   | 5317772-4 | PG II | 9.8  |
| male   | 5years 10months  | 5807527-4 | PG II | 8.8  |
| male   | 2years 2months   | 7623734-3 | PG II | 8.1  |
| female | 10years          | 8049940-3 | PG II | 13.5 |
| female | 8years 10months  | 6234043-4 | PG II | 5.8  |
| male   | 7years 10months  | 8573764-3 | PG II | 11.2 |
| male   | 3years 5months   | 7832688-3 | PG II | 9.5  |
| male   | 12years 2months  | 8416703-4 | PG II | 11.3 |

|        |                  |           |       |      |
|--------|------------------|-----------|-------|------|
| female | 11years 1months  | 4016087-2 | PG II | 10.7 |
| male   | 4years 10months  | 6204401-3 | PG II | 7.2  |
| male   | 10years 1months  | 7824021-3 | PG II | 8.4  |
| male   | 2years           | 741297    | PG II | 9.2  |
| female | 8years           | 465509    | PG II | 10.9 |
| male   | 12years          | 741301    | PG II | 20.1 |
| male   | 9years 6months   | 6303063-4 | PG II | 6.8  |
| male   | 10years 1months  | 4635818-2 | PG II | 6.2  |
| male   | 10years 11months | 742615    | PG II | 10.0 |
| female | 9years 6months   | 8291017-3 | PG II | 6.6  |
| male   | 1years 8months   | 8398730-4 | PG II | 7.5  |
| female | 13years 6months  | 730049    | PG II | 7.9  |
| female | 8years 2months   | 4229505-4 | PG II | 17.8 |
| male   | 5years 8months   | 5863753-4 | PG II | 10.3 |
| male   | 4years           | 741331    | PG II | 9.1  |
| male   | 4years 7months   | 694675    | PG II | 7.8  |
| male   | 13years 2months  | 3420198-4 | PG II | 8.2  |
| female | 3years           | 8585450-3 | PG II | 6.6  |
| male   | 13years 1months  | 7417535-3 | PG II | 14.4 |
| male   | 6years 3months   | 6812388-4 | PG II | 9.8  |
| female | 5years           | 8583335-3 | PG II | 10.4 |
| male   | 10years 11months | 601323    | PG II | 8.8  |
| male   | 1years 7months   | 8580521-3 | PG II | 7.1  |
| female | 11years 5months  | 7168246-4 | PG II | 7.4  |
| female | 9years 5months   | 7380658-3 | PG II | 8.7  |
| male   | 9years 3months   | 742976    | PG II | 8.2  |
| male   | 16years          | 7012394-3 | PG II | 5.4  |
| female | 10years 8months  | 8587486-3 | PG II | 6.2  |
| male   | 3years 4months   | 7578600-4 | PG II | 12.5 |
| male   | 15years          | 4744969-4 | PG II | 21.7 |
| male   | 17years          | 4860162-4 | PG II | 9.9  |
| male   | 9years 2months   | 6993257-4 | PG II | 13.5 |

|        |                 |           |       |      |
|--------|-----------------|-----------|-------|------|
| male   | 8years 4months  | 4468028-2 | PG II | 9.0  |
| female | 1years 9months  | 7642276-3 | PG II | 8.4  |
| male   | 10years 5months | 3491683-4 | PG II | 10.8 |
| female | 6years 11months | 8419828-3 | PG II | 7.6  |
| female | 2years 5months  | 7637344-3 | PG II | 7.5  |
| male   | 9years 11months | 743168    | PG II | 18.7 |
| female | 3years          | 743145    | PG II | 9.8  |
| male   | 5years 2months  | 6035195-4 | PG II | 8.5  |
| female | 9years 8months  | 8285396-3 | PG II | 8.2  |
| female | 8years 8months  | 6574408-4 | PG II | 11.1 |
| male   | 9months 16days  | 8591481-3 | PG II | 6.6  |
| male   | 13years 1months | 743100    | PG II | 20.1 |
| female | 12years 3months | 6560448-2 | PG II | 11.4 |
| male   | 1years 6months  | 8413216-3 | PG II | 6.2  |
| male   | 6years          | 8563331-3 | PG II | 10.9 |
| male   | 4years 3months  | 8531549-4 | PG II | 7.8  |
| male   | 9months 15days  | 8322947-3 | PG II | 7.5  |
| male   | 6years 3months  | 8429776-3 | PG II | 8.0  |
| female | 5years 2months  | 8561203-3 | PG II | 12.4 |
| male   | 6years 2months  | 6610134-3 | PG II | 16.9 |
| male   | 4years 2months  | 8593757-3 | PG II | 12.7 |
| male   | 3years 8months  | 657178    | PG II | 18.3 |
| male   | 5years 4months  | 723978    | PG II | 7.2  |
| female | 12years 4months | 8599376-3 | PG II | 7.9  |
| male   | 12years 8months | 8045140-2 | PG II | 9.0  |
| male   | 7years 6months  | 8597982-3 | PG II | 7.4  |
| male   | 15years         | 4648001-2 | PG II | 12.3 |
| female | 7years 4months  | 743501    | PG II | 9.9  |
| female | 1years          | 8274719-3 | PG II | 11.9 |
| male   | 1years 7months  | 7992197-3 | PG II | 11.0 |
| male   | 5years 4months  | 7069685-3 | PG II | 7.5  |
| male   | 1years 7months  | 7809233-3 | PG II | 9.4  |
| female | 4years 8months  | 7074547-4 | PG II | 7.2  |
| female | 6years 5months  | 6226016-3 | PG II | 7.8  |
| female | 7years 3months  | 6559353-3 | PG II | 4.8  |
| female | 4years 6months  | 7407709-3 | PG II | 13.3 |
| male   | 2years 9months  | 7693775-3 | PG II | 8.9  |
| female | 9years 8months  | 6100824-4 | PG II | 10.6 |



|        |                  |           |       |        |
|--------|------------------|-----------|-------|--------|
| male   | 5years 11months  | 6685050-3 | PG II | 6. 1   |
| female | 12years 11months | 6925348-4 | PG II | 5. 9   |
| male   | 5years 3months   | 7302119-3 | PG II | 14. 0  |
| male   | 6years 1months   | 6233643-3 | PG II | 9. 9   |
| male   | 7years           | 8286162-3 | PG II | 16. 5  |
| male   | 2years 5months   | 8599726-3 | PG II | 12. 6  |
| female | 5years 9months   | 6674307-4 | PG II | 10. 4  |
| female | 5years 6months   | 5999826-4 | PG II | 5. 5   |
| female | 7years 11months  | 6930717-3 | PG II | 9. 2   |
| male   | 4years 1months   | 7332885-4 | PG II | 11. 6  |
| male   | 4years 6months   | 8162834-3 | PG II | 6. 6   |
| female | 6years 3months   | 5272491-4 | PG II | 12. 4  |
| female | 7years 7months   | 8606798-3 | PG II | 15. 4  |
| male   | 1years 10months  | 8600861-3 | PG II | 8. 4   |
| female | 7years 3months   | 4914444-4 | PG II | 9. 4   |
| male   | 4years 9months   | 6315082-3 | PG II | 8. 6   |
| male   | 11years 4months  | 244159    | PG II | 5. 29  |
| female | 10months 25days  | 8599018-3 | PG II | 7. 80  |
| male   | 7years 9months   | 7044552-4 | PG II | 12. 68 |
| male   | 8years 1months   | 8610418-4 | PG II | 12. 60 |
| female | 4years 5months   | 6513070-4 | PG II | 12. 49 |
| male   | 8years 2months   | 8133457-4 | PG II | 7. 96  |
| male   | 1years 7months   | 7859067-3 | PG II | 6. 71  |
| male   | 11years 10months | 8474394-3 | PG II | 17. 66 |
| female | 2years 11months  | 7865203-3 | PG II | 8. 47  |
| female | 11months 7days   | 8609625-3 | PG II | 8. 31  |
| female | 4years 2months   | 8607176-3 | PG II | 6. 03  |
| female | 5years 1months   | 7409124-3 | PG II | 7. 98  |
| male   | 6years           | 8125196-3 | PG II | 5. 74  |
| female | 2years 4months   | 8611222-3 | PG II | 7. 85  |
| male   | 4years 6months   | 6448193-4 | PG II | 10. 10 |
| male   | 8years 10months  | 7599331-3 | PG II | 10. 19 |
| female | 3years 2months   | 8568875-3 | PG II | 4. 48  |
| female | 7years 3months   | 744869    | PG II | 6. 50  |

|        |                  |           |       |        |
|--------|------------------|-----------|-------|--------|
| female | 5years 10months  | 8593770-3 | PG II | 5. 46  |
| male   | 6years 2months   | 743933    | PG II | 16. 31 |
| female | 6years 1months   | 5872161-4 | PG II | 6. 31  |
| male   | 5years 8months   | 5887118-4 | PG II | 6. 20  |
| male   | 10years 2months  | 7095684-4 | PG II | 11. 18 |
| female | 5years 9months   | 7137780-4 | PG II | 8. 75  |
| female | 13years 4months  | 8449682-3 | PG II | 11. 98 |
| female | 1years 11months  | 7603028-3 | PG II | 5. 88  |
| female | 2years 2months   | 7629443-3 | PG II | 7. 54  |
| male   | 8years 6months   | 8614252-3 | PG II | 9. 98  |
| female | 11months 8days   | 8160887-3 | PG II | 10. 77 |
| female | 1years 7months   | 7955404-3 | PG II | 6. 74  |
| male   | 2years 9months   | 7434238-4 | PG II | 7. 28  |
| female | 1years 2months   | 8112394-3 | PG II | 10. 38 |
| male   | 1years 1months   | 8046958-2 | PG II | 7. 62  |
| female | 3years 3months   | 8421507-3 | PG II | 9. 49  |
| male   | 3years 7months   | 7080745-3 | PG II | 8. 86  |
| male   | 2years 3months   | 8611254-3 | PG II | 10. 03 |
| male   | 4years 3months   | 6755996-4 | PG II | 10. 56 |
| female | 8months 16days   | 8532773-3 | PG II | 5. 25  |
| female | 3years           | 8318790-3 | PG II | 10. 27 |
| female | 2years 11months  | 7887922-3 | PG II | 10. 21 |
| male   | 3years 5months   | 7019823-3 | PG II | 5. 38  |
| male   | 1years 6months   | 7937128-3 | PG II | 10. 35 |
| male   | 1years           | 8268358-3 | PG II | 9. 64  |
| male   | 7years 1months   | 745494    | PG II | 5. 79  |
| male   | 11years 7months  | 679798    | PG II | 12. 51 |
| female | 7years 6months   | 744360    | PG II | 5. 54  |
| male   | 6years 11months  | 744381    | PG II | 12. 65 |
| female | 1years 6months   | 8358387-3 | PG II | 6. 41  |
| female | 3years 6months   | 745206    | PG II | 9. 21  |
| male   | 10months 17days  | 8621673-3 | PG II | 10. 27 |
| male   | 12years 11months | 685434    | PG II | 60. 76 |

|        |                  |           |       |        |
|--------|------------------|-----------|-------|--------|
| male   | 6years 8months   | 745734    | PG II | 6. 61  |
| male   | 8years 8months   | 727590    | PG II | 8. 11  |
| male   | 10years 9months  | 739629    | PG II | 14. 21 |
| male   | 8years 3months   | 7991156-3 | PG II | 12. 06 |
| male   | 1years 5months   | 8542468-4 | PG II | 13. 69 |
| male   | 1years 2months   | 7987977-2 | PG II | 7. 76  |
| male   | 6years 11months  | 8622426-4 | PG II | 9. 23  |
| male   | 3years           | 7407414-3 | PG II | 9. 70  |
| male   | 6years 10months  | 7745138-3 | PG II | 10. 36 |
| female | 3years 5months   | 7184297-3 | PG II | 12. 42 |
| female | 6years 4months   | 8617138-3 | PG II | 9. 39  |
| male   | 4years 6months   | 6670544-3 | PG II | 14. 23 |
| male   | 11years 3months  | 8618453-2 | PG II | 13. 61 |
| male   | 5years 4months   | 8446218-3 | PG II | 7. 89  |
| male   | 4years 3months   | 745618    | PG II | 6. 50  |
| female | 5years 8months   | 8023945-3 | PG II | 8. 95  |
| female | 7years 3months   | 4684221-4 | PG II | 19. 15 |
| female | 2years 3months   | 8043918-4 | PG II | 9. 05  |
| male   | 10years 2months  | 8491930-3 | PG II | 48. 25 |
| male   | 2years 4months   | 7564646-4 | PG II | 13. 92 |
| female | 1years 2months   | 8618277-3 | PG II | 10. 54 |
| male   | 3years 1months   | 7157323-3 | PG II | 10. 73 |
| female | 6years 3months   | 7326971-3 | PG II | 7. 20  |
| male   | 2years 2months   | 7804096-3 | PG II | 10. 52 |
| female | 4years 7months   | 6457939-3 | PG II | 20. 02 |
| male   | 6years           | 8362250-3 | PG II | 7. 01  |
| male   | 6years           | 5957902-2 | PG II | 9. 51  |
| male   | 6years 10months  | 8626438-3 | PG II | 13. 15 |
| male   | 5years           | 8201103-3 | PG II | 9. 66  |
| male   | 12years 10months | 8548008-3 | PG II | 10. 09 |
| female | 1years 3months   | 8619190-3 | PG II | 10. 69 |
| female | 5years 9months   | 7813744-3 | PG II | 10. 42 |
| male   | 8months 28days   | 8624594-3 | PG II | 10. 92 |
| male   | 3years 11months  | 7622537-3 | PG II | 10. 15 |
| female | 1years 8months   | 692971    | PG II | 16. 41 |

|        |                  |           |       |        |
|--------|------------------|-----------|-------|--------|
| female | 9years 11months  | 3615042-4 | PG II | 10. 50 |
| male   | 12years          | 8624470-3 | PG II | 10. 81 |
| female | 1years 3months   | 7985126-3 | PG II | 9. 68  |
| female | 4years 1months   | 7564676-3 | PG II | 4. 89  |
| male   | 6years 10months  | 7983004-3 | PG II | 8. 23  |
| male   | 10years          | 6719981-3 | PG II | 7. 89  |
| female | 6years 11months  | 7663895-3 | PG II | 9. 35  |
| female | 13years 6months  | 5637734-4 | PG II | 30. 22 |
| female | 9years 3months   | 8628888-3 | PG II | 7. 70  |
| male   | 6years 3months   | 8629823-3 | PG II | 10. 69 |
| male   | 17years          | 8090268-3 | PG II | 10. 48 |
| male   | 8years 2months   | 7509974-3 | PG II | 7. 08  |
| male   | 9years 11months  | 8630839-4 | PG II | 9. 19  |
| female | 4years 3months   | 6589939-4 | PG II | 10. 42 |
| male   | 10months 26days  | 8155717-4 | PG II | 6. 82  |
| female | 8years 5months   | 6883071-3 | PG II | 8. 64  |
| female | 15years          | 6028392-4 | PG II | 10. 09 |
| female | 6years 2months   | 5321669-4 | PG II | 6. 86  |
| male   | 7years 2months   | 5729518-4 | PG II | 4. 34  |
| male   | 5years 9months   | 8568162-3 | PG II | 8. 25  |
| male   | 5years 8months   | 5942737-3 | PG II | 7. 22  |
| male   | 9years 2months   | 739763    | PG II | 18. 45 |
| male   | 17years          | 746503    | PG II | 26. 47 |
| female | 6years 5months   | 746451    | PG II | 26. 21 |
| female | 4years 11months  | 6367641-4 | PG II | 61. 05 |
| male   | 6years 10months  | 5231242-4 | PG II | 6. 37  |
| female | 10years 11months | 8632899-3 | PG II | 16. 88 |
| male   | 1years 9months   | 7757173-3 | PG II | 6. 37  |
| male   | 7years           | 8376038-4 | PG II | 8. 27  |
| male   | 8years 10months  | 8633137-4 | PG II | 12. 65 |
| female | 1years 6months   | 8016188-3 | PG II | 7. 16  |
| male   | 1years 9months   | 8595220-3 | PG II | 9. 47  |
| female | 7months 8days    | 8394125-4 | PG II | 9. 25  |
| male   | 4years 5months   | 7355877-3 | PG II | 12. 94 |
| male   | 2years 1months   | 8626872-3 | PG II | 8. 03  |
| male   | 10years          | 710483    | PG II | 10. 54 |
| female | 9years 10months  | 315796    | PG II | 5. 70  |

|        |                 |           |       |        |
|--------|-----------------|-----------|-------|--------|
| female | 4months 21days  | 8464356-3 | PG II | 9. 11  |
| female | 2years 3months  | 7663593-3 | PG II | 7. 68  |
| male   | 3years 5months  | 7573498-3 | PG II | 8. 62  |
| female | 10years 1months | 6216431-4 | PG II | 7. 64  |
| male   | 2years 11months | 8320937-3 | PG II | 10. 98 |
| male   | 3years 10months | 8161720-3 | PG II | 6. 91  |
| male   | 2years 5months  | 7636660-3 | PG II | 10. 29 |
| male   | 12years 1months | 6264265-4 | PG II | 12. 55 |
| male   | 9years          | 8401090-3 | PG II | 11. 25 |
| male   | 5years 10months | 746305    | PG II | 8. 86  |
| female | 2years 7months  | 682385    | PG II | 5. 84  |
| male   | 1years 1months  | 8490291-4 | PG II | 7. 12  |
| female | 4years 8months  | 6470658-4 | PG II | 8. 19  |
| female | 12years 1months | 8636395-3 | PG II | 8. 64  |
| female | 5years 6months  | 5962782-3 | PG II | 7. 22  |
| male   | 13years 3months | 8361572-3 | PG II | 10. 44 |
| female | 6years 2months  | 8630236-4 | PG II | 50. 90 |
| female | 2years 6months  | 8636257-3 | PG II | 10. 36 |
| female | 1years 1months  | 8059365-4 | PG II | 10. 50 |
| male   | 1years 7months  | 7915371-3 | PG II | 7. 49  |
| female | 1years 1months  | 8637517-3 | PG II | 10. 07 |
| male   | 2years 6months  | 8450355-3 | PG II | 10. 21 |
| female | 1years 3months  | 8571390-3 | PG II | 14. 11 |
| female | 5years 3months  | 6716259-4 | PG II | 8. 89  |
| male   | 12years 2months | 746280    | PG II | 15. 91 |
| male   | 8years 7months  | 4276495-2 | PG II | 6. 21  |
| female | 8years 1months  | 8613207-3 | PG II | 7. 10  |
| male   | 8years 10months | 4194774-4 | PG II | 14. 39 |
| female | 10months 14days | 8632785-3 | PG II | 15. 37 |
| female | 5years 7months  | 6105137-4 | PG II | 12. 44 |
| male   | 12years 7months | 747153    | PG II | 7. 22  |
| female | 5years 8months  | 6027170-4 | PG II | 7. 56  |
| female | 5years 6months  | 8465260-3 | PG II | 11. 77 |
| male   | 5years 3months  | 8643850-3 | PG II | 9. 61  |
| male   | 2years 10months | 7530635-4 | PG II | 8. 60  |
| female | 13years 6months | 8640496-3 | PG II | 7. 68  |
| female | 13years 8months | 7916457-3 | PG II | 7. 72  |
| female | 10months 15days | 8369858-3 | PG II | 9. 39  |
| male   | 3years 2months  | 7187575-3 | PG II | 9. 37  |
| male   | 13years         | 4790841-4 | PG II | 18. 49 |
| female | 4years 8months  | 6579522-3 | PG II | 6. 45  |
| male   | 6years 2months  | 5699950-2 | PG II | 8. 03  |

|        |                  |           |       |       |
|--------|------------------|-----------|-------|-------|
| male   | 7years 5months   | 4644751-4 | PG II | 8.99  |
| male   | 6years 7months   | 4948756-4 | PG II | 8.91  |
| female | 6years           | 6782403-4 | PG II | 7.45  |
| female | 2years 11months  | 7203528-3 | PG II | 15.03 |
| male   | 8years 11months  | 8644601-3 | PG II | 7.66  |
| female | 5years 3months   | 8402964-3 | PG II | 10.29 |
| male   | 5years 6months   | 6941026-3 | PG II | 11.19 |
| female | 4months 16days   | 8511999-3 | PG II | 10.02 |
| male   | 2years 5months   | 7945940-3 | PG II | 8.88  |
| female | 9years 3months   | 747537    | PG II | 6.84  |
| male   | 1years 6months   | 7819530-3 | PG II | 15.51 |
| male   | 10years          | 747264    | PG II | 7.93  |
| female | 4years 2months   | 8641535-3 | PG II | 9.09  |
| female | 8years 2months   | 8639703-3 | PG II | 12.23 |
| male   | 1years 2months   | 8101561-3 | PG II | 8.07  |
| male   | 9years 5months   | 8603846-3 | PG II | 7.26  |
| male   | 9years 6months   | 8647485-3 | PG II | 5.75  |
| male   | 7months 19days   | 8431029-3 | PG II | 10.21 |
| female | 11years          | 747687    | PG II | 5.90  |
| female | 7years 7months   | 747649    | PG II | 7.89  |
| male   | 5years 7months   | 8282543-3 | PG II | 7.24  |
| male   | 7months 24days   | 8648973-4 | PG II | 10.58 |
| male   | 2years 7months   | 7543735-3 | PG II | 6.63  |
| male   | 7years 8months   | 8648516-3 | PG II | 11.71 |
| female | 1years 7months   | 8646399-3 | PG II | 7.12  |
| female | 9years 4months   | 8648248-3 | PG II | 12.96 |
| male   | 5years 3months   | 7031114-3 | PG II | 7.62  |
| male   | 7years           | 8613123-3 | PG II | 7.33  |
| male   | 5months 11days   | 8647560-3 | PG II | 8.84  |
| male   | 1years 5months   | 8649845-3 | PG II | 9.15  |
| female | 4years           | 8643832-3 | PG II | 6.99  |
| female | 1years 5months   | 8160845-3 | PG II | 8.23  |
| female | 4years 4months   | 6557528-4 | PG II | 10.21 |
| female | 2years           | 8650470-3 | PG II | 8.62  |
| male   | 13years 5months  | 747894    | PG II | 17.81 |
| male   | 3years 11months  | 8646600-3 | PG II | 9.11  |
| female | 5years 3months   | 6272559-3 | PG II | 6.78  |
| male   | 11years 10months | 8651938-3 | PG II | 21.15 |

|        |                  |           |       |       |
|--------|------------------|-----------|-------|-------|
| male   | 6years 4months   | 7877186-3 | PG II | 9.03  |
| male   | 10years 10months | 3400369-4 | PG II | 11.69 |
| male   | 10years          | 747902    | PG II | 6.97  |
| male   | 4years 6months   | 6774599-3 | PG II | 9.80  |
| female | 3years 1months   | 7444116-3 | PG II | 20.02 |
| male   | 4years 10months  | 6376495-3 | PG II | 9.17  |
| female | 7years 9months   | 8061873-3 | PG II | 12.40 |
| male   | 4years 4months   | 8628323-3 | PG II | 5.99  |
| female | 12years 10months | 8515190-3 | PG II | 7.54  |
| male   | 8years 3months   | 7727173-3 | PG II | 11.60 |
| female | 9years           | 8476453-3 | PG II | 23.54 |
| female | 3years 5months   | 7169763-4 | PG II | 4.78  |
| male   | 9years 4months   | 3847896-4 | PG II | 8.41  |
| female | 5years 1months   | 8032718-3 | PG II | 6.37  |
| female | 8years 3months   | 7029393-4 | PG II | 7.39  |
| male   | 8years 3months   | 4296587-4 | PG II | 7.62  |
| female | 4years 7months   | 6714047-4 | PG II | 8.33  |
| male   | 4years 4months   | 8654652-3 | PG II | 5.73  |
| male   | 9years 5months   | 5774838-4 | PG II | 8.37  |
| male   | 5years 4months   | 7247586-3 | PG II | 12.23 |
| female | 1years 4months   | 8006026-3 | PG II | 11.71 |
| female | 10months 14days  | 8649194-3 | PG II | 9.27  |
| male   | 2years 6months   | 7554962-3 | PG II | 6.61  |
| female | 6years 7months   | 7811235-3 | PG II | 14.37 |
| female | 5years 3months   | 8657382-4 | PG II | 6.52  |
| female | 6years 10months  | 8657700-4 | PG II | 8.60  |
| female | 5years 6months   | 7439697-3 | PG II | 7.91  |
| male   | 4years 5months   | 6541630-3 | PG II | 11.69 |
| male   | 8years 6months   | 8641922-4 | PG II | 12.44 |
| male   | 4years 3months   | 6846177-4 | PG II | 8.93  |
| female | 4years 6months   | 8657753-4 | PG II | 7.99  |
| female | 2years 9months   | 8206729-3 | PG II | 8.39  |
| female | 1years 3months   | 8117792-3 | PG II | 8.76  |

|        |                  |           |       |        |
|--------|------------------|-----------|-------|--------|
| female | 1years 9months   | 7946087-3 | PG II | 9. 51  |
| female | 8months 3days    | 8438201-3 | PG II | 8. 64  |
| male   | 5years 2months   | 8222590-3 | PG II | 12. 55 |
| female | 12years 5months  | 748374    | PG II | 12. 30 |
| male   | 3years 2months   | 7555992-3 | PG II | 10. 07 |
| female | 3years 7months   | 7101623-3 | PG II | 11. 96 |
| female | 4years 3months   | 7063918-3 | PG II | 6. 93  |
| male   | 3years           | 8654362-3 | PG II | 8. 23  |
| male   | 7years 6months   | 7624508-3 | PG II | 12. 40 |
| female | 5years           | 7964228-3 | PG II | 13. 46 |
| female | 1years 5months   | 8658243-3 | PG II | 4. 85  |
| male   | 4years 5months   | 7921165-3 | PG II | 6. 76  |
| male   | 1years 7months   | 8654593-3 | PG II | 15. 89 |
| male   | 4years 4months   | 6573265-4 | PG II | 7. 64  |
| male   | 4years 9months   | 8655578-3 | PG II | 8. 62  |
| female | 5years 10months  | 8657718-3 | PG II | 8. 76  |
| female | 13years 10months | 8659647-3 | PG II | 8. 05  |
| male   | 4years 7months   | 748456    | PG II | 9. 07  |
| male   | 9years 5months   | 8635053-3 | PG II | 7. 68  |
| male   | 9years 9months   | 8104550-3 | PG II | 8. 33  |
| female | 7years 3months   | 7416431-4 | PG II | 6. 91  |
| male   | 5years 7months   | 7216394-4 | PG II | 6. 78  |
| female | 2years 4months   | 7502953-3 | PG II | 10. 07 |
| female | 2years 4months   | 7787062-3 | PG II | 10. 36 |
| male   | 7years 4months   | 4676727-4 | PG II | 6. 67  |
| female | 3years 8months   | 747555    | PG II | 6. 48  |
| female | 9years 2months   | 748652    | PG II | 8. 86  |
| male   | 2years 2months   | 748516    | PG II | 8. 35  |
| male   | 10years 8months  | 748117    | PG II | 13. 67 |
| male   | 6years 1months   | 6120913-4 | PG II | 26. 39 |
| male   | 1years 3months   | 8024426-3 | PG II | 10. 69 |
| female | 6months 20days   | 8663625-3 | PG II | 7. 22  |
| male   | 1years 5months   | 8052974-3 | PG II | 9. 63  |



|        |                  |           |       |       |
|--------|------------------|-----------|-------|-------|
| male   | 1years 9months   | 8299891-3 | PG II | 8.45  |
| female | 9years 10months  | 8633701-3 | PG II | 4.68  |
| female | 4years 7months   | 6465219-4 | PG II | 7.41  |
| female | 4years 7months   | 8668237-4 | PG II | 7.24  |
| female | 8years 10months  | 749174    | PG II | 9.78  |
| female | 4years 9months   | 8481778-3 | PG II | 9.17  |
| female | 7years 9months   | 8668429-4 | PG II | 11.86 |
| male   | 5years 2months   | 6263825-4 | PG II | 11.17 |
| male   | 6years 8months   | 5286686-4 | PG II | 9.07  |
| male   | 5years 11months  | 7198866-3 | PG II | 8.35  |
| male   | 13years 9months  | 749412    | PG II | 84.67 |
| female | 4years 6months   | 749422    | PG II | 9.53  |
| female | 3years 7months   | 6992379-3 | PG II | 4.82  |
| male   | 12years 3months  | 4907018-4 | PG II | 10.71 |
| female | 4years 6months   | 6985118-3 | PG II | 6.65  |
| female | 3years 6months   | 8475434-3 | PG II | 6.88  |
| female | 6years 9months   | 7024667-3 | PG II | 7.95  |
| female | 3years           | 749500    | PG II | 5.43  |
| female | 9years 8months   | 749484    | PG II | 9.59  |
| male   | 9years 9months   | 8671059-3 | PG II | 10.48 |
| male   | 3years 2months   | 7100762-3 | PG II | 18.74 |
| female | 5years 3months   | 6655201-4 | PG II | 8.29  |
| female | 6years 8months   | 8177953-3 | PG II | 16.25 |
| female | 1years 11months  | 7608937-4 | PG II | 12.44 |
| female | 7years 11months  | 5227073-4 | PG II | 7.37  |
| female | 16years          | 746957    | PG II | 61.64 |
| female | 9years 3months   | 6285997-3 | PG II | 9.86  |
| male   | 11years 1months  | 8671244-3 | PG II | 13.13 |
| male   | 13years 9months  | 749412    | PG II | 28.03 |
| female | 6years 9months   | 5278895-4 | PG II | 5.86  |
| female | 4months 26days   | 8672467-3 | PG II | 11.14 |
| male   | 11years 11months | 749591    | PG II | 8.68  |
| female | 6years           | 6975339-4 | PG II | 8.95  |
| female | 5years 4months   | 8672774-3 | PG II | 6.99  |
| female | 10years 2months  | 3636493-2 | PG II | 7.54  |
| male   | 8years 2months   | 6255604-4 | PG II | 20.53 |

|        |                      |           |       |        |
|--------|----------------------|-----------|-------|--------|
| female | 8months 13days       | 8665592-3 | PG II | 12. 53 |
| female | 4years 2months       | 6771386-3 | PG II | 11. 92 |
| male   | 6years 11months      | 5785634-2 | PG II | 10. 92 |
| male   | 3years 1months       | 8671064-4 | PG II | 8. 05  |
| male   | 9years 9months       | 4558036-4 | PG II | 9. 88  |
| male   | 4years 4months       | 7645688-4 | PG II | 17. 11 |
| female | 7years               | 7929570-4 | PGI   | 126. 2 |
| female | 5years 9months       | 5913909-4 | PGI   | 104. 0 |
| male   | 8years 7months       | 699244    | PGI   | 214. 6 |
| female | 7years               | 7929570-4 | PGII  | 25. 8  |
| female | 5years 9months       | 5913909-4 | PGII  | 21. 9  |
| male   | 8years 7months       | 699244    | PGII  | 57. 35 |
| female | 7years               | 7929570-4 | PGR   | 5      |
| male   | 8years 7months       | 699244    | PGR   | 4      |
| female | 5years 9months       | 5913909-4 | PGR   | 5      |
| female | 5years 3months       | 699279    | PGR   | 6. 2   |
| male   | 10years 4months      | 698576    | PGR   | 4. 8   |
| male   | 8years 7months       | 699244    | PGR   | 4. 2   |
| female | 9years 7months       | 7972998-3 | PGR   | 4. 0   |
| female | 5years 3months       | 7969728-3 | PGR   | 4. 6   |
| male   | 3years               | 7971126-3 | PGR   | 4. 3   |
| male   | 2years 7months       | 7972110-3 | PGR   | 4. 5   |
| male   | 7years 9months       | 7973389-3 | PGR   | 4. 6   |
| female | 7years 6months       | 699258    | PGR   | 5. 7   |
| male   | 9years 6months       | 699904    | PGR   | 1. 65  |
| female | 8years 5months       | 5737934-4 | PGR   | 3. 9   |
| female | 5years               | 5810524-3 | PGR   | 4. 8   |
| male   | 8years 5months       | 4147025-4 | PGR   | 4. 6   |
| female | 9years 4months       | 7963363-4 | PGR   | 3. 8   |
| female | 10years              | 6674130-4 | PGR   | 5. 4   |
| male   | 3years 3months       | 7972784-3 | PGR   | 4. 7   |
| female | 5years 9months       | 7904620-3 | PGR   | 5. 7   |
| male   | 4years 1months       | 6383780-4 | PGR   | 4. 32  |
| female | 4years 2months 5days | 7974811-4 | PGR   | 5. 0   |
| male   | 6years               | 7975004-4 | PGR   | 5. 5   |
| male   | 6years               | 4724240-4 | PGR   | 3. 8   |
| female | 11years              | 670482    | PGR   | 5      |
| male   | 10years 2months      | 695629    | PGR   | 7      |

|        |                  |           |     |    |
|--------|------------------|-----------|-----|----|
| male   | 3years 11months  | 6640181-4 | PGR | 4  |
| male   | 9years           | 6272602-4 | PGR | 4  |
| female | 6years           | 6937158-4 | PGR | 5  |
| male   | 4years 4months   | 6413580-4 | PGR | 6  |
| female | 17years          | 7830366-3 | PGR | 10 |
| male   | 2years 9months   | 6781393-4 | PGR | 5  |
| male   | 5years           | 7976444-3 | PGR | 5  |
| male   | 3years 8months   | 7362776-3 | PGR | 5  |
| male   | 4years 5months   | 7896567-3 | PGR | 7  |
| male   | 6years 6months   | 4739772-2 | PGR | 7  |
| male   | 4years 1months   | 7452261-3 | PGR | 6  |
| female | 8years 4months   | 700131    | PGR | 4  |
| female | 8years 9months   | 7980678-3 | PGR | 6  |
| male   | 4years 9months   | 6502898-3 | PGR | 10 |
| male   | 11years 10months | 7932766-4 | PGR | 5  |
| female | 4years 1months   | 7973073-3 | PGR | 7  |
| male   | 9years 7months   | 700389    | PGR | 9  |
| female | 4years 9months   | 7784183-3 | PGR | 9  |
| male   | 6years 6months   | 699529    | PGR | 9  |
| female | 3years 6months   | 700665    | PGR | 6  |
| female | 6years 5months   | 624304    | PGR | 9  |
| male   | 4years 6months   | 700881    | PGR | 5  |
| male   | 13years 8months  | 700639    | PGR | 7  |
| female | 3years 1months   | 6937388-3 | PGR | 6  |
| male   | 1years 6months   | 700572    | PGR | 8  |
| male   | 3years 2months   | 7986107-3 | PGR | 4  |
| male   | 8years 8months   | 7964681-4 | PGR | 9  |
| male   | 7years 7months   | 6960244-3 | PGR | 7  |
| male   | 4years 1months   | 6109623-3 | PGR | 5  |
| female | 5years 1months   | 7471906-3 | PGR | 8  |
| female | 5years 5months   | 7842710-3 | PGR | 6  |
| male   | 3years 10months  | 7473291-3 | PGR | 6  |
| male   | 4years 11months  | 7986092-3 | PGR | 7  |
| male   | 2years 11months  | 7464079-3 | PGR | 7  |
| female | 4years 5months   | 6021989-2 | PGR | 6  |

|        |                  |           |     |    |
|--------|------------------|-----------|-----|----|
| male   | 13years 1months  | 3410834-4 | PGR | 7  |
| female | 6years 2months   | 4779997-2 | PGR | 8  |
| male   | 13years 11months | 700909    | PGR | 7  |
| male   | 5years 9months   | 5751008-4 | PGR | 7  |
| female | 8years 2months   | 7223608-4 | PGR | 8  |
| male   | 8years 4months   | 4241826-2 | PGR | 8  |
| female | 3years 3months   | 702811    | PGR | 5  |
| male   | 8years 10months  | 7899450-3 | PGR | 6  |
| female | 3years 5months   | 7146581-3 | PGR | 7  |
| male   | 10years 1months  | 698980    | PGR | 10 |
| male   | 3years 10months  | 8001845-3 | PGR | 5  |
| female | 5years 11months  | 7888723-3 | PGR | 11 |
| female | 3years 9months   | 8005477-3 | PGR | 7  |
| male   | 10years 6months  | 6524385-4 | PGR | 8  |
| male   | 4years 11months  | 5748497-4 | PGR | 7  |
| male   | 5years 8months   | 5295537-4 | PGR | 14 |
| female | 1years 4months   | 7666225-4 | PGR | 16 |
| female | 9years 4months   | 8016427-4 | PGR | 18 |
| female | 8years 9months   | 7928099-3 | PGR | 19 |
| male   | 10years 6months  | 3578968-4 | PGR | 15 |
| male   | 3years 7months   | 7961608-3 | PGR | 7  |
| male   | 6years 6months   | 6119429-3 | PGR | 5  |
| male   | 8years           | 5721496-4 | PGR | 7  |
| male   | 3years 6months   | 7793218-3 | PGR | 17 |
| male   | 3years 2months   | 8032393-3 | PGR | 16 |
| male   | 3years 9months   | 6398641-4 | PGR | 20 |
| male   | 11years          | 3911658-4 | PGR | 18 |
| female | 7years           | 7733927-3 | PGR | 17 |
| male   | 7years           | 7385739-3 | PGR | 15 |
| male   | 8years 11months  | 704315    | PGR | 7  |
| male   | 11years 3months  | 658125    | PGR | 7  |
| male   | 10years 3months  | 704414    | PGR | 6  |
| female | 2years 6months   | 6990753-4 | PGR | 8  |
| female | 11years          | 7987458-4 | PGR | 18 |
| male   | 7years 7months   | 8044968-3 | PGR | 18 |
| male   | 6years 8months   | 704487    | PGR | 13 |

|        |                  |           |     |    |
|--------|------------------|-----------|-----|----|
| male   | 2years 8months   | 7005541-2 | PGR | 16 |
| male   | 4years 8months   | 704549    | PGR | 13 |
| female | 5years 11months  | 705304    | PGR | 16 |
| male   | 3years 1months   | 704562    | PGR | 19 |
| male   | 12years 3months  | 693496    | PGR | 9  |
| female | 10years 4months  | 493247    | PGR | 13 |
| male   | 6years 10months  | 578029    | PGR | 12 |
| female | 11years 5months  | 705466    | PGR | 22 |
| male   | 4years 6months   | 6092525-3 | PGR | 15 |
| male   | 2years 10months  | 8053004-3 | PGR | 19 |
| female | 2years 1months   | 8053274-3 | PGR | 4  |
| male   | 13years 4months  | 645856    | PGR | 15 |
| male   | 12years 11months | 705531    | PGR | 11 |
| male   | 8years 6months   | 705563    | PGR | 16 |
| female | 9years 1months   | 705570    | PGR | 19 |
| male   | 12years 3months  | 705634    | PGR | 17 |
| male   | 12years 10months | 705839    | PGR | 18 |
| male   | 11years 9months  | 705590    | PGR | 18 |
| male   | 3years 6months   | 6767552-3 | PGR | 13 |
| female | 9years 6months   | 705887    | PGR | 17 |
| female | 4years 9months   | 705916    | PGR | 11 |
| male   | 8years 2months   | 635646    | PGR | 18 |
| male   | 4years 5months   | 705947    | PGR | 15 |
| male   | 9years 10months  | 686401    | PGR | 14 |
| male   | 6years 5months   | 705963    | PGR | 17 |
| male   | 4years 4months   | 6220111-2 | PGR | 30 |
| male   | 9years 4months   | 291093    | PGR | 18 |
| male   | 9years 7months   | 705699    | PGR | 17 |
| male   | 13years 6months  | 531559    | PGR | 11 |
| female | 8years 2months   | 690675    | PGR | 11 |
| female | 12years 10months | 249601    | PGR | 17 |
| female | 7years 9months   | 705755    | PGR | 13 |
| female | 7years 4months   | 706175    | PGR | 12 |
| male   | 13years 2months  | 706220    | PGR | 14 |
| male   | 11years 1months  | 666462    | PGR | 17 |
| male   | 10years 8months  | 706239    | PGR | 7  |
| male   | 10years 7months  | 688024    | PGR | 13 |
| male   | 7years           | 706351    | PGR | 13 |
| male   | 13years 1months  | 706335    | PGR | 12 |

|        |                  |           |     |    |
|--------|------------------|-----------|-----|----|
| male   | 12years 2months  | 706410    | PGR | 14 |
| female | 9years 9months   | 706415    | PGR | 16 |
| female | 8years 1months   | 3934239-4 | PGR | 11 |
| male   | 10years 8months  | 706627    | PGR | 10 |
| male   | 11years 1months  | 706618    | PGR | 11 |
| male   | 5years 11months  | 706445    | PGR | 12 |
| male   | 5years 9months   | 706371    | PGR | 10 |
| male   | 9years 4months   | 8067225-3 | PGR | 9  |
| female | 16years          | 706715    | PGR | 6  |
| female | 5years 7months   | 706701    | PGR | 11 |
| male   | 4years 11months  | 706468    | PGR | 11 |
| male   | 12years 2months  | 706718    | PGR | 10 |
| female | 12years 5months  | 706464    | PGR | 11 |
| male   | 8years 4months   | 332307    | PGR | 11 |
| male   | 10years 9months  | 4054226-2 | PGR | 3  |
| female | 8years 9months   | 706658    | PGR | 3  |
| female | 8years 3months   | 5747576-4 | PGR | 11 |
| male   | 9years 7months   | 706737    | PGR | 10 |
| male   | 13years 11months | 699986    | PGR | 11 |
| male   | 10years          | 706881    | PGR | 5  |
| male   | 9years 4months   | 706877    | PGR | 6  |
| female | 8years 6months   | 706510    | PGR | 5  |
| female | 8years 1months   | 706964    | PGR | 12 |
| male   | 9years           | 685471    | PGR | 14 |
| female | 12years 2months  | 706583    | PGR | 11 |
| male   | 4years 2months   | 706574    | PGR | 10 |
| female | 8years 10months  | 8073240-3 | PGR | 13 |
| male   | 5years           | 707414    | PGR | 9  |
| female | 9years           | 707182    | PGR | 13 |
| male   | 10years 6months  | 707190    | PGR | 13 |
| female | 15years          | 707262    | PGR | 15 |
| female | 8years 9months   | 707295    | PGR | 14 |
| male   | 13years 4months  | 707320    | PGR | 13 |
| female | 6years 1months   | 707329    | PGR | 11 |
| male   | 4years           | 6706424-4 | PGR | 13 |
| male   | 12years 6months  | 707374    | PGR | 13 |
| female | 6years 6months   | 707313    | PGR | 8  |

|        |                  |           |     |    |
|--------|------------------|-----------|-----|----|
| female | 13years 10months | 653341    | PGR | 16 |
| male   | 6years 7months   | 558096    | PGR | 17 |
| male   | 13years          | 707463    | PGR | 13 |
| male   | 8years 5months   | 707629    | PGR | 3  |
| female | 6years 4months   | 707325    | PGR | 3  |
| male   | 7years 3months   | 707330    | PGR | 9  |
| male   | 5years 8months   | 707484    | PGR | 5  |
| male   | 12years 5months  | 707720    | PGR | 3  |
| female | 8years 5months   | 7592305-3 | PGR | 8  |
| male   | 11years 9months  | 707757    | PGR | 3  |
| male   | 10years 6months  | 707766    | PGR | 7  |
| female | 8years 8months   | 707527    | PGR | 16 |
| male   | 10years 11months | 707913    | PGR | 6  |
| male   | 12years 9months  | 707915    | PGR | 7  |
| male   | 2years 10months  | 6978064-3 | PGR | 5  |
| male   | 3years 6months   | 6633022-4 | PGR | 5  |
| male   | 11years 7months  | 707991    | PGR | 6  |
| female | 2years 6months   | 707580    | PGR | 4  |
| female | 2years 11months  | 707596    | PGR | 8  |
| female | 10years          | 691969    | PGR | 8  |
| male   | 5years 8months   | 708001    | PGR | 4  |
| male   | 12years 7months  | 708329    | PGR | 8  |
| male   | 2years 3months   | 7328852-3 | PGR | 5  |
| male   | 5years 9months   | 8065452-3 | PGR | 7  |
| male   | 9years 9months   | 708404    | PGR | 7  |
| male   | 3years 10months  | 708401    | PGR | 3  |
| male   | 3years 3months   | 708406    | PGR | 4  |
| female | 11years 1months  | 708037    | PGR | 4  |
| female | 10years 6months  | 708468    | PGR | 3  |
| male   | 17years          | 7346286-3 | PGR | 12 |
| female | 3years 8months   | 663817    | PGR | 6  |
| female | 6years 4months   | 708728    | PGR | 8  |
| male   | 7years 2months   | 705553    | PGR | 4  |
| male   | 8years 9months   | 446802    | PGR | 6  |
| male   | 5years 1months   | 8085074-4 | PGR | 10 |
| male   | 8years 9months   | 708188    | PGR | 9  |
| female | 8years 7months   | 709056    | PGR | 8  |
| male   | 2years 8months   | 7068845-3 | PGR | 4  |
| female | 14years          | 709093    | PGR | 6  |

|        |                  |           |     |    |
|--------|------------------|-----------|-----|----|
| female | 2years 7months   | 709116    | PGR | 7  |
| male   | 13years 3months  | 709152    | PGR | 7  |
| male   | 7years 10months  | 709176    | PGR | 7  |
| male   | 5years 2months   | 709196    | PGR | 4  |
| female | 6years 7months   | 709231    | PGR | 7  |
| male   | 13years 8months  | 709370    | PGR | 9  |
| female | 10years 10months | 709448    | PGR | 6  |
| male   | 7years 3months   | 7859687-3 | PGR | 6  |
| female | 1years 5months   | 709454    | PGR | 4  |
| female | 11years 10months | 709389    | PGR | 5  |
| male   | 12years 1months  | 190725    | PGR | 6  |
| male   | 11years 2months  | 709519    | PGR | 6  |
| male   | 16years          | 564216    | PGR | 3  |
| male   | 13years 7months  | 697058    | PGR | 6  |
| female | 12years 2months  | 709785    | PGR | 7  |
| male   | 3years 7months   | 8106021-3 | PGR | 9  |
| male   | 11years          | 656341    | PGR | 11 |
| male   | 11years 4months  | 709549    | PGR | 8  |
| male   | 8years 10months  | 709555    | PGR | 10 |
| male   | 2years 9months   | 708922    | PGR | 3  |
| female | 15years          | 698961    | PGR | 5  |
| female | 9years 10months  | 8110361-3 | PGR | 7  |
| male   | 7years 4months   | 8109733-3 | PGR | 9  |
| male   | 13years 9months  | 648337    | PGR | 8  |
| male   | 10years 8months  | 709822    | PGR | 3  |
| female | 13years 8months  | 709824    | PGR | 6  |
| male   | 10years 10months | 709815    | PGR | 4  |
| female | 6years 6months   | 709834    | PGR | 6  |
| female | 7years 4months   | 709864    | PGR | 10 |
| female | 10years 1months  | 710216    | PGR | 7  |
| male   | 10years 4months  | 709922    | PGR | 9  |
| male   | 12years 9months  | 710373    | PGR | 9  |
| male   | 12years 9months  | 698800    | PGR | 4  |
| male   | 13years 1months  | 710136    | PGR | 7  |
| male   | 15years          | 710393    | PGR | 5  |
| female | 3years 8months   | 549938    | PGR | 7  |
| male   | 9years 5months   | 706909    | PGR | 8  |
| male   | 10years 6months  | 710415    | PGR | 8  |



|        |                 |           |     |    |
|--------|-----------------|-----------|-----|----|
| female | 9years 10months | 710605    | PGR | 6  |
| female | 12years 5months | 710597    | PGR | 7  |
| female | 6years 10months | S32664    | PGR | 9  |
| female | 10years 3months | 710243    | PGR | 4  |
| male   | 9years 7months  | 676039    | PGR | 13 |
| female | 9years 8months  | 710817    | PGR | 8  |
| female | 10years         | 711201    | PGR | 7  |
| female | 12years 8months | 706249    | PGR | 7  |
| female | 2years 10months | 7924824-3 | PGR | 7  |
| male   | 5years 11months | 537285    | PGR | 7  |
| female | 7years 5months  | 604618    | PGR | 8  |
| male   | 11years 6months | 711314    | PGR | 6  |
| male   | 9years          | 685471    | PGR | 6  |
| male   | 13years 2months | 690943    | PGR | 7  |
| male   | 1years 9months  | 7384820-3 | PGR | 7  |
| female | 10years 1months | 710905    | PGR | 5  |
| female | 7years 4months  | 710907    | PGR | 7  |
| male   | 9years 9months  | 710908    | PGR | 8  |
| female | 3years          | 710919    | PGR | 4  |
| male   | 11years 6months | 252975    | PGR | 4  |
| female | 6years 10months | 712520    | PGR | 4  |
| female | 3years 11months | 677393    | PGR | 3  |
| male   | 10years 3months | 712495    | PGR | 6  |
| male   | 3years 5months  | 8042845-3 | PGR | 9  |
| male   | 8years 11months | 710992    | PGR | 2  |
| female | 13years 3months | 711620    | PGR | 9  |
| female | 4years 10months | 669451    | PGR | 7  |
| male   | 13years 2months | 711272    | PGR | 26 |
| male   | 3years 3months  | 7119838-3 | PGR | 6  |
| male   | 13years 5months | 712046    | PGR | 6  |
| male   | 10years 4months | 7150123-3 | PGR | 10 |
| male   | 13years 3months | 712114    | PGR | 8  |
| male   | 9years 8months  | 712172    | PGR | 7  |
| male   | 7years 9months  | 712207    | PGR | 7  |
| female | 14years         | 712381    | PGR | 5  |
| male   | 12years         | 712748    | PGR | 6  |
| female | 9years 8months  | 712827    | PGR | 7  |
| female | 10years 7months | 712818    | PGR | 7  |
| male   | 9months 4days   | 712611    | PGR | 3  |

|        |                  |           |     |    |
|--------|------------------|-----------|-----|----|
| female | 3years 8months   | 8109428-3 | PGR | 6  |
| male   | 1years 8months   | 8156707-3 | PGR | 10 |
| male   | 10years 11months | 368354    | PGR | 7  |
| male   | 2years 6months   | 8157049-4 | PGR | 7  |
| female | 5years 6months   | 472537    | PGR | 6  |
| female | 12years 11months | 713021    | PGR | 7  |
| female | 10years 5months  | 713019    | PGR | 6  |
| male   | 10years 4months  | 713338    | PGR | 6  |
| male   | 13years 6months  | 714614    | PGR | 8  |
| male   | 13years 2months  | 3398251-4 | PGR | 6  |
| female | 11years 5months  | 714670    | PGR | 8  |
| female | 12years 11months | 714756    | PGR | 5  |
| female | 12years 10months | 714766    | PGR | 7  |
| female | 5years 11months  | 503196    | PGR | 5  |
| female | 12years 7months  | 715232    | PGR | 8  |
| female | 5years 9months   | 8164577-3 | PGR | 6  |
| male   | 9years 7months   | 715264    | PGR | 11 |
| male   | 5years           | 6817844-4 | PGR | 6  |
| male   | 9years 6months   | 340846    | PGR | 10 |
| female | 8years 6months   | 713151    | PGR | 5  |
| male   | 4years 8months   | 8149732-3 | PGR | 7  |
| male   | 7years           | 668191    | PGR | 14 |
| male   | 11years 1months  | 713172    | PGR | 8  |
| female | 5years 9months   | 714398    | PGR | 10 |
| female | 3years 7months   | 714826    | PGR | 7  |
| female | 5years 4months   | 5673608-4 | PGR | 9  |
| female | 6years 10months  | 713833    | PGR | 8  |
| female | 7years 10months  | 713473    | PGR | 8  |
| male   | 9years 3months   | 713476    | PGR | 6  |
| female | 2years 9months   | 8174769-3 | PGR | 9  |
| female | 13years 4months  | 713948    | PGR | 5  |
| female | 3years 4months   | 7293423-4 | PGR | 5  |
| male   | 13years 2months  | 714051    | PGR | 9  |
| male   | 10years 9months  | 714049    | PGR | 6  |
| female | 4years 3months   | 714058    | PGR | 10 |
| male   | 12years 6months  | 4157759-1 | PGR | 6  |

|        |                  |           |     |    |
|--------|------------------|-----------|-----|----|
| female | 10years          | 714112    | PGR | 6  |
| female | 9years 5months   | 714097    | PGR | 5  |
| male   | 6years           | 714099    | PGR | 8  |
| male   | 11years 4months  | 694106    | PGR | 5  |
| female | 7years 8months   | 713560    | PGR | 5  |
| male   | 10years 4months  | 675863    | PGR | 6  |
| female | 5years 4months   | 713598    | PGR | 5  |
| female | 12years 9months  | 502694    | PGR | 6  |
| female | 12years 5months  | 542784    | PGR | 5  |
| male   | 10years 7months  | 659995    | PGR | 5  |
| male   | 7years 10months  | 713637    | PGR | 7  |
| male   | 7years 10months  | 713618    | PGR | 7  |
| male   | 4years 8months   | 5919127-4 | PGR | 8  |
| male   | 3years           | 655953    | PGR | 5  |
| female | 2years 6months   | S32731    | PGR | 4  |
| male   | 1years 7months   | 7654544-3 | PGR | 4  |
| female | 5years 6months   | 713798    | PGR | 5  |
| male   | 10years 1months  | 694658    | PGR | 7  |
| male   | 2years 5months   | 7307918-3 | PGR | 4  |
| male   | 4years 3months   | 715056    | PGR | 5  |
| female | 3years 7months   | 715549    | PGR | 8  |
| male   | 6years 3months   | 715572    | PGR | 9  |
| male   | 7years 4months   | 4898744-4 | PGR | 9  |
| male   | 5years 4months   | 715807    | PGR | 10 |
| female | 10years 10months | 625862    | PGR | 5  |
| male   | 10years 8months  | 716070    | PGR | 5  |
| male   | 4years 3months   | 8186394-3 | PGR | 3  |
| male   | 7years 6months   | 716124    | PGR | 6  |
| female | 12years 8months  | 716150    | PGR | 6  |
| male   | 10years 4months  | 716176    | PGR | 8  |
| female | 13years 9months  | 716180    | PGR | 8  |
| male   | 4years 8months   | 716148    | PGR | 8  |
| female | 2months 7days    | 715854    | PGR | 2  |
| female | 10years          | 716200    | PGR | 4  |
| female | 6months 11days   | 715872    | PGR | 4  |
| male   | 7years 1months   | 716409    | PGR | 3  |
| male   | 6years 6months   | 716404    | PGR | 4  |
| female | 11years 11months | 716419    | PGR | 5  |

|        |                  |           |     |   |
|--------|------------------|-----------|-----|---|
| male   | 6years 9months   | 716411    | PGR | 6 |
| male   | 9years 10months  | 715895    | PGR | 5 |
| female | 3years 5months   | 8196849-3 | PGR | 4 |
| male   | 13years 2months  | 696017    | PGR | 6 |
| male   | 8years 11months  | 715912    | PGR | 7 |
| male   | 11years 11months | 716460    | PGR | 8 |
| female | 11years 11months | 716516    | PGR | 4 |
| male   | 2years 8months   | 7276330-3 | PGR | 3 |
| female | 10years          | 717790    | PGR | 5 |
| male   | 9years 6months   | 715999    | PGR | 5 |
| male   | 10years 2months  | 613149    | PGR | 6 |
| male   | 8years           | 716575    | PGR | 6 |
| male   | 9years 9months   | 717765    | PGR | 6 |
| male   | 12years 4months  | 717715    | PGR | 4 |
| male   | 9years 6months   | 716535    | PGR | 6 |
| female | 7years 7months   | 717649    | PGR | 5 |
| male   | 10years 11months | 717672    | PGR | 3 |
| female | 6years 10months  | 717685    | PGR | 1 |
| female | 12years 2months  | 716802    | PGR | 4 |
| female | 7years           | 717432    | PGR | 3 |
| male   | 10years 7months  | 716871    | PGR | 6 |
| male   | 11years 10months | 698682    | PGR | 5 |
| male   | 2years 6months   | 640899    | PGR | 8 |
| male   | 7years 11months  | 717534    | PGR | 6 |
| male   | 7years 4months   | 717517    | PGR | 8 |
| male   | 12years 11months | 294356    | PGR | 4 |
| female | 3years 3months   | 717543    | PGR | 6 |
| female | 10years 3months  | 716963    | PGR | 6 |
| female | 8years 5months   | 716952    | PGR | 8 |
| male   | 9years 11months  | 716962    | PGR | 6 |
| female | 5years 8months   | 716977    | PGR | 6 |
| male   | 15years          | 4387581-2 | PGR | 6 |
| female | 13years 9months  | 718159    | PGR | 5 |
| female | 7years 10months  | 652867    | PGR | 4 |
| female | 5years           | 6527866-3 | PGR | 4 |
| male   | 5years 1months   | 717814    | PGR | 4 |
| female | 8years 8months   | 717296    | PGR | 4 |

|        |                 |           |     |    |
|--------|-----------------|-----------|-----|----|
| female | 2years 8months  | 7463603-3 | PGR | 3  |
| male   | 4years 2months  | 718751    | PGR | 7  |
| male   | 8years 10months | 647217    | PGR | 6  |
| female | 4years 11months | 5955434-3 | PGR | 8  |
| male   | 3years 9months  | 6475589-4 | PGR | 6  |
| male   | 3years 8months  | 7819203-4 | PGR | 5  |
| female | 13years 3months | 717390    | PGR | 5  |
| female | 7years 11months | 718484    | PGR | 7  |
| female | 8years 5months  | 718480    | PGR | 5  |
| male   | 13years 9months | 720005    | PGR | 11 |
| male   | 9years 4months  | 720749    | PGR | 6  |
| female | 6years 9months  | 720736    | PGR | 5  |
| female | 4years 10months | 698175    | PGR | 4  |
| male   | 12years 8months | 720113    | PGR | 4  |
| male   | 12years 4months | 309900    | PGR | 5  |
| male   | 10years 7months | 720139    | PGR | 6  |
| male   | 7years 1months  | 601355    | PGR | 5  |
| male   | 2years 1months  | 7519641-3 | PGR | 7  |
| male   | 2years 6months  | 7260329-3 | PGR | 4  |
| male   | 6years 6months  | 5824615-4 | PGR | 6  |
| male   | 10years         | 719930    | PGR | 3  |
| female | 7years 2months  | 442759    | PGR | 7  |
| female | 3years 2months  | 8245492-3 | PGR | 5  |
| male   | 3years 11months | 720462    | PGR | 2  |
| male   | 8years 6months  | 697736    | PGR | 5  |
| female | 3years 7months  | 8250774-3 | PGR | 5  |
| male   | 2years 8months  | 7961414-4 | PGR | 4  |
| male   | 2years 8months  | 7265954-3 | PGR | 4  |
| female | 6years 3months  | 473825    | PGR | 7  |
| female | 5years 3months  | 719642    | PGR | 4  |
| female | 10years 5months | 719655    | PGR | 5  |
| male   | 11years 5months | 684093    | PGR | 4  |
| female | 7years 7months  | 719209    | PGR | 5  |
| male   | 2years 1months  | 721400    | PGR | 8  |
| male   | 13years 9months | 675811    | PGR | 4  |
| female | 9years 6months  | 721271    | PGR | 8  |

|        |                  |           |     |   |
|--------|------------------|-----------|-----|---|
| male   | 10years 1months  | 6200477-4 | PGR | 6 |
| male   | 5years 6months   | 8193419-3 | PGR | 5 |
| male   | 7years 7months   | 380090    | PGR | 6 |
| female | 5years 9months   | 719796    | PGR | 6 |
| male   | 7years 10months  | 691011    | PGR | 3 |
| male   | 5years 5months   | 722144    | PGR | 5 |
| female | 3years 10months  | 6573022-4 | PGR | 8 |
| male   | 11years 6months  | 722387    | PGR | 4 |
| male   | 12years 5months  | 722138    | PGR | 8 |
| male   | 12years 3months  | 722363    | PGR | 5 |
| female | 7years 10months  | 722580    | PGR | 5 |
| female | 2years 9months   | 7463603-3 | PGR | 2 |
| male   | 12years 9months  | 719214    | PGR | 3 |
| female | 7years           | 712520    | PGR | 4 |
| female | 8years 5months   | 722541    | PGR | 4 |
| female | 13years 9months  | 722584    | PGR | 4 |
| male   | 13years 6months  | 719215    | PGR | 2 |
| female | 9years 5months   | 722668    | PGR | 5 |
| male   | 11years 7months  | 721915    | PGR | 5 |
| male   | 10months 2days   | 8296689-3 | PGR | 5 |
| female | 2years 8months   | 7492633-3 | PGR | 5 |
| female | 10years 9months  | 555302    | PGR | 9 |
| female | 3years 4months   | 723096    | PGR | 8 |
| male   | 2years 1months   | 7680487-3 | PGR | 6 |
| female | 12years 11months | 723520    | PGR | 6 |
| male   | 11years 8months  | 723139    | PGR | 5 |
| male   | 4years 6months   | 532101    | PGR | 4 |
| male   | 5years 11months  | 723482    | PGR | 5 |
| male   | 11years          | 723142    | PGR | 5 |
| female | 4years 11months  | 8289226-3 | PGR | 4 |
| male   | 5years 8months   | 8150202-3 | PGR | 5 |
| male   | 6years           | 451126    | PGR | 3 |
| male   | 3years 10months  | 636827    | PGR | 4 |
| female | 3years 11months  | 552562    | PGR | 5 |
| male   | 7years 4months   | 724335    | PGR | 8 |
| female | 14years          | 553622    | PGR | 5 |
| male   | 5years 1months   | 536438    | PGR | 3 |

|        |                  |           |     |       |
|--------|------------------|-----------|-----|-------|
| male   | 3years 3months   | 724374    | PGR | 4     |
| male   | 2years 8months   | 7061396-4 | PGR | 6     |
| female | 12years 1months  | 190308    | PGR | 7     |
| female | 8years 3months   | 716704    | PGR | 6     |
| male   | 10years 8months  | 724606    | PGR | 6     |
| female | 3years 4months   | 724665    | PGR | 3     |
| female | 12years 10months | 724685    | PGR | 4     |
| male   | 1years 8months   | 724694    | PGR | 6     |
| female | 12years 1months  | 191258    | PGR | 7     |
| male   | 9years 6months   | 725135    | PGR | 4     |
| male   | 10years          | 7826142-3 | PGR | 6     |
| female | 9years 9months   | 725396    | PGR | 5     |
| female | 5years 9months   | 725510    | PGR | 5     |
| male   | 4years 6months   | 6429528-4 | PGR | 4     |
| male   | 7years 4months   | 725674    | PGR | 5     |
| male   | 3years 6months   | 725684    | PGR | 9     |
| female | 5years 9months   | 725951    | PGR | 5     |
| male   | 12years 8months  | 725947    | PGR | 6     |
| male   | 2years 1months   | 725762    | PGR | 3     |
| male   | 2years           | 7817380-3 | PGR | 5     |
| male   | 6years 2months   | 725767    | PGR | 4     |
| male   | 5years 3months   | 725996    | PGR | 2. 66 |
| female | 10years 2months  | 726222    | PGR | 5     |
| male   | 6years           | 726208    | PGR | 5     |
| male   | 3years 1months   | 726207    | PGR | 3     |
| male   | 5years 10months  | 726673    | PGR | 5     |
| male   | 8years 5months   | 727098    | PGR | 4     |
| male   | 10years 9months  | 727199    | PGR | 4     |
| female | 11years 1months  | 726836    | PGR | 2     |
| male   | 7years 9months   | 726835    | PGR | 3     |
| female | 10years 6months  | 362924    | PGR | 6     |
| male   | 7years           | 4653172-2 | PGR | 6     |
| female | 9months 27days   | 8373376-3 | PGR | 5     |
| male   | 9years 3months   | 727223    | PGR | 8     |
| female | 3years 2months   | 726867    | PGR | 4     |
| male   | 8years 3months   | 727590    | PGR | 6     |
| male   | 9years 7months   | 727325    | PGR | 5     |
| female | 3years 4months   | 8245492-3 | PGR | 5     |

|        |                  |           |     |   |
|--------|------------------|-----------|-----|---|
| male   | 8years 8months   | 388791    | PGR | 3 |
| male   | 3years 8months   | 7128005-2 | PGR | 4 |
| female | 3years 4months   | 727747    | PGR | 4 |
| male   | 5years 4months   | 727784    | PGR | 3 |
| female | 1years 11months  | 8075811-4 | PGR | 3 |
| male   | 3months 5days    | 8384623-3 | PGR | 5 |
| male   | 13years 5months  | 727436    | PGR | 5 |
| male   | 1months 10days   | 728146    | PGR | 1 |
| female | 9years 1months   | 728173    | PGR | 5 |
| female | 8years 2months   | 728163    | PGR | 5 |
| male   | 15years          | 728150    | PGR | 4 |
| female | 13years 8months  | 728227    | PGR | 9 |
| female | 4years 7months   | 714058    | PGR | 8 |
| female | 13years 4months  | 728309    | PGR | 7 |
| male   | 7years 9months   | 727884    | PGR | 6 |
| female | 7years           | 728905    | PGR | 5 |
| female | 10years 9months  | 728907    | PGR | 5 |
| male   | 7years 10months  | 728843    | PGR | 3 |
| male   | 9years 7months   | 728840    | PGR | 7 |
| male   | 1years 7months   | 728889    | PGR | 4 |
| male   | 5years           | 729286    | PGR | 7 |
| male   | 7years 6months   | 727465    | PGR | 6 |
| female | 9years           | 651644    | PGR | 4 |
| female | 9years 2months   | 729062    | PGR | 8 |
| male   | 12years 11months | 656823    | PGR | 4 |
| male   | 12years 7months  | 729493    | PGR | 6 |
| female | 10years 6months  | 691969    | PGR | 7 |
| female | 11years          | 728420    | PGR | 4 |
| male   | 12years 6months  | 728451    | PGR | 3 |
| male   | 8years 11months  | 728436    | PGR | 4 |
| female | 2years 10months  | 7912616-3 | PGR | 4 |
| female | 8years 10months  | 728520    | PGR | 6 |
| female | 6years 7months   | 596651    | PGR | 4 |
| male   | 6years 8months   | 729537    | PGR | 6 |
| male   | 10years 3months  | 719930    | PGR | 3 |
| male   | 7years 9months   | 707330    | PGR | 6 |
| male   | 6years 8months   | 729565    | PGR | 5 |
| male   | 13years          | 728619    | PGR | 7 |



|        |                  |           |     |    |
|--------|------------------|-----------|-----|----|
| male   | 5years 4months   | 728697    | PGR | 6  |
| male   | 15years          | 728742    | PGR | 3  |
| female | 13years 6months  | 728758    | PGR | 4  |
| male   | 12years 9months  | 728721    | PGR | 6  |
| male   | 2years 5months   | 8406053-3 | PGR | 4  |
| female | 1years 10months  | 7599769-3 | PGR | 4  |
| male   | 3months 10days   | 721024    | PGR | 2  |
| female | 8months          | 8034739-2 | PGR | 4  |
| male   | 12years 9months  | 729654    | PGR | 3  |
| female | 10years          | 729810    | PGR | 4  |
| male   | 13years 10months | 729823    | PGR | 3  |
| male   | 10years 11months | 729880    | PGR | 4  |
| male   | 9years 9months   | 729879    | PGR | 4  |
| female | 1years 10months  | 7599769-3 | PGR | 3  |
| male   | 10years          | 729882    | PGR | 3  |
| male   | 6years 6months   | 729856    | PGR | 4  |
| female | 6years 4months   | 6872972-4 | PGR | 4  |
| female | 11years 11months | 729959    | PGR | 4  |
| female | 13years 3months  | 730049    | PGR | 6  |
| male   | 6years 9months   | 729724    | PGR | 6  |
| female | 8years 10months  | 729736    | PGR | 11 |
| female | 5years 8months   | 729731    | PGR | 4  |
| male   | 9years 3months   | 721651    | PGR | 5  |
| male   | 10years 2months  | 390956    | PGR | 3  |
| male   | 9years 3months   | 730065    | PGR | 7  |
| female | 6years 9months   | 730196    | PGR | 5  |
| female | 6years 10months  | 624668    | PGR | 5  |
| male   | 8years 1months   | 8421631-3 | PGR | 4  |
| female | 5years 8months   | 730593    | PGR | 5  |
| female | 13years 9months  | 730235    | PGR | 5  |
| male   | 3years 5months   | 8312992-3 | PGR | 5  |
| male   | 1years 6months   | 7646202-4 | PGR | 5  |
| female | 4years 2months   | 730258    | PGR | 3  |
| male   | 13years 4months  | 8433502-3 | PGR | 8  |
| male   | 11years 2months  | 730771    | PGR | 8  |

|        |                  |           |     |   |
|--------|------------------|-----------|-----|---|
| male   | 1years 11months  | 7623734-3 | PGR | 5 |
| female | 1years 2months   | 8394720-3 | PGR | 6 |
| male   | 6years 7months   | 494659    | PGR | 8 |
| female | 7years 10months  | 730957    | PGR | 5 |
| male   | 8years 5months   | 730311    | PGR | 9 |
| female | 13years 10months | 730327    | PGR | 6 |
| female | 9years 11months  | 731065    | PGR | 4 |
| female | 11years 9months  | 730336    | PGR | 6 |
| male   | 14years          | 730342    | PGR | 5 |
| female | 6years 2months   | 8418291-3 | PGR | 4 |
| male   | 5years 11months  | 6697958-3 | PGR | 8 |
| female | 12years 10months | 7189014-4 | PGR | 6 |
| male   | 9years 10months  | 731092    | PGR | 4 |
| male   | 11years 2months  | 8434477-3 | PGR | 7 |
| male   | 2years 5months   | 7420070-3 | PGR | 5 |
| female | 11years 6months  | 658313    | PGR | 6 |
| male   | 6years 5months   | 731237    | PGR | 4 |
| male   | 8years 10months  | 731175    | PGR | 5 |
| female | 6years 11months  | 731172    | PGR | 5 |
| male   | 10years 10months | 252827    | PGR | 6 |
| male   | 7years 2months   | 731676    | PGR | 5 |
| male   | 10months 23days  | 7991515-4 | PGR | 4 |
| male   | 8years 8months   | 731674    | PGR | 9 |
| male   | 1years 11months  | 731690    | PGR | 3 |
| female | 8years 5months   | 602551    | PGR | 7 |
| male   | 6months 28days   | 707191    | PGR | 4 |
| male   | 10years 9months  | 731683    | PGR | 6 |
| male   | 1years 5months   | 7855707-3 | PGR | 4 |
| male   | 11years 11months | 731471    | PGR | 6 |

|        |                  |           |     |   |
|--------|------------------|-----------|-----|---|
| female | 3years 5months   | 7264330-3 | PGR | 1 |
| female | 12years 8months  | 731845    | PGR | 6 |
| male   | 10years 1months  | 576654    | PGR | 5 |
| male   | 13years 11months | 707320    | PGR | 5 |
| male   | 11years 6months  | 731822    | PGR | 6 |
| female | 5years 9months   | 658542    | PGR | 5 |
| male   | 8years 1months   | 731193    | PGR | 8 |
| male   | 12years 11months | 8179946-3 | PGR | 4 |
| female | 10years          | 731542    | PGR | 8 |
| female | 15years          | 731536    | PGR | 5 |
| male   | 4years 1months   | 731205    | PGR | 6 |
| female | 4years 2months   | 649987    | PGR | 3 |
| female | 12years 8months  | 8445510-3 | PGR | 7 |
| male   | 6years 6months   | 498160    | PGR | 4 |
| male   | 5years 1months   | 6941026-3 | PGR | 5 |
| female | 10years 10months | 731579    | PGR | 6 |
| male   | 15years          | 732015    | PGR | 6 |
| male   | 10years 9months  | 732048    | PGR | 5 |
| male   | 5years 2months   | 732056    | PGR | 6 |
| female | 7years 1months   | 707313    | PGR | 4 |
| male   | 4years 8months   | 7487699-3 | PGR | 5 |
| male   | 7years 11months  | 732524    | PGR | 4 |
| female | 12years 8months  | 732590    | PGR | 4 |
| male   | 1years 9months   | 7637653-3 | PGR | 5 |
| male   | 2years 1months   | 7799240-3 | PGR | 4 |
| female | 3years 3months   | 6931288-4 | PGR | 5 |
| male   | 15years          | 343771    | PGR | 7 |
| male   | 5years 4months   | 732143    | PGR | 4 |
| male   | 1years 8months   | 7726108-3 | PGR | 5 |
| male   | 10months 4days   | 8048694-3 | PGR | 4 |
| female | 7years 7months   | 732781    | PGR | 4 |
| female | 8years 3months   | 732783    | PGR | 6 |

|        |                  |           |     |   |
|--------|------------------|-----------|-----|---|
| female | 4years 11months  | 6200051-4 | PGR | 3 |
| male   | 5years 11months  | 7694017-4 | PGR | 6 |
| female | 11months 2days   | 8183151-3 | PGR | 4 |
| female | 4years 7months   | 8460514-3 | PGR | 6 |
| male   | 1years 9months   | 8455388-3 | PGR | 6 |
| female | 1years 4months   | 7873322-3 | PGR | 5 |
| female | 5years 10months  | 8459555-3 | PGR | 5 |
| male   | 9years 1months   | 732837    | PGR | 4 |
| male   | 10years 3months  | 732197    | PGR | 5 |
| male   | 5months 19days   | 732847    | PGR | 1 |
| male   | 4years 5months   | 733019    | PGR | 5 |
| female | 9years 3months   | 732885    | PGR | 5 |
| female | 11years          | 732921    | PGR | 5 |
| male   | 8years 11months  | 733026    | PGR | 5 |
| female | 10years 3months  | 4695509-4 | PGR | 4 |
| female | 7years 3months   | 6876049-4 | PGR | 6 |
| male   | 7years 2months   | 732993    | PGR | 6 |
| female | 6years 2months   | 733710    | PGR | 4 |
| female | 10years 9months  | 733743    | PGR | 5 |
| female | 6years 5months   | 733063    | PGR | 5 |
| male   | 8years 6months   | 7187533-4 | PGR | 4 |
| male   | 6years 8months   | 8456017-3 | PGR | 5 |
| female | 2years 1months   | 8426004-3 | PGR | 5 |
| male   | 5years 7months   | 5841341-4 | PGR | 5 |
| female | 5years 3months   | 6472410-4 | PGR | 5 |
| female | 9years 11months  | 7937771-3 | PGR | 5 |
| female | 6years 5months   | 5832976-4 | PGR | 5 |
| female | 4years           | 733661    | PGR | 8 |
| male   | 8years 11months  | 733098    | PGR | 5 |
| male   | 8years 8months   | 733784    | PGR | 5 |
| female | 1months 25days   | 733621    | PGR | 2 |
| male   | 9years 4months   | 733114    | PGR | 7 |
| male   | 10years 4months  | 734069    | PGR | 8 |
| male   | 13years          | 734063    | PGR | 5 |
| female | 12years 11months | 734048    | PGR | 5 |
| male   | 12years 6months  | 733674    | PGR | 5 |
| female | 4years 6months   | 8088411-3 | PGR | 4 |

|        |                  |           |     |    |
|--------|------------------|-----------|-----|----|
| female | 4years 11months  | 6542937-3 | PGR | 5  |
| male   | 7months 5days    | 8418143-3 | PGR | 4  |
| female | 9years 10months  | 731489    | PGR | 4  |
| female | 4years 4months   | 585144    | PGR | 4  |
| male   | 7years 5months   | 606132    | PGR | 4  |
| male   | 10years 7months  | 734217    | PGR | 7  |
| female | 7years 7months   | 734244    | PGR | 3  |
| female | 6years 8months   | 733841    | PGR | 4  |
| female | 6years           | 5294162-4 | PGR | 4  |
| female | 9years 4months   | 734336    | PGR | 5  |
| male   | 5years 8months   | 733889    | PGR | 6  |
| female | 12years 9months  | 8445510-3 | PGR | 7  |
| male   | 12years 9months  | 734363    | PGR | 6  |
| male   | 9years 3months   | 702607    | PGR | 4  |
| male   | 3years 9months   | 575069    | PGR | 4  |
| male   | 2years 8months   | 733916    | PGR | 5  |
| male   | 7years 10months  | 734482    | PGR | 4  |
| female | 10months 8days   | 8476209-3 | PGR | 5  |
| male   | 5years 2months   | 6501135-3 | PGR | 5  |
| male   | 6months 2days    | 8308766-3 | PGR | 4  |
| female | 2years 6months   | 7391971-4 | PGR | 5  |
| male   | 10years 6months  | 734647    | PGR | 3  |
| male   | 4years 6months   | 733951    | PGR | 3  |
| female | 5years 3months   | 734656    | PGR | 4  |
| male   | 12years 11months | 734637    | PGR | 7  |
| male   | 2years 1months   | 8480386-3 | PGR | 4  |
| male   | 7years 11months  | 707330    | PGR | 10 |
| female | 11years 8months  | 734764    | PGR | 5  |
| male   | 12years 5months  | 478812    | PGR | 5  |
| male   | 2years 4months   | 733985    | PGR | 4  |

|        |                  |           |     |   |
|--------|------------------|-----------|-----|---|
| male   | 12years 1months  | 735006    | PGR | 6 |
| male   | 8years 7months   | 735027    | PGR | 4 |
| female | 6years 6months   | 735044    | PGR | 3 |
| female | 6years 10months  | 735048    | PGR | 4 |
| male   | 11years          | 480839    | PGR | 3 |
| male   | 8years 5months   | 734590    | PGR | 9 |
| female | 15years          | 728809    | PGR | 5 |
| male   | 8years 11months  | 735116    | PGR | 4 |
| male   | 3years 8months   | 733139    | PGR | 6 |
| male   | 11years 5months  | 735162    | PGR | 5 |
| male   | 9years 7months   | 735135    | PGR | 7 |
| male   | 10years 5months  | 735071    | PGR | 5 |
| female | 4years           | 6597952-4 | PGR | 3 |
| male   | 5years 5months   | 8486502-3 | PGR | 5 |
| male   | 5years 5months   | 6752056-3 | PGR | 5 |
| male   | 8years 5months   | 734590    | PGR | 9 |
| female | 10years 1months  | 6742204-4 | PGR | 4 |
| male   | 8years 11months  | 735202    | PGR | 5 |
| female | 7years 5months   | 4500735-4 | PGR | 4 |
| male   | 10years 10months | 696440    | PGR | 7 |
| female | 3years 11months  | 6723721-3 | PGR | 5 |
| female | 12years 9months  | 8450518-3 | PGR | 5 |
| male   | 2years 4months   | 7500338-3 | PGR | 4 |
| male   | 11years 11months | 7314337-4 | PGR | 6 |
| male   | 1years 5months   | 7757173-3 | PGR | 5 |
| male   | 4years 5months   | 6317689-3 | PGR | 5 |
| female | 4years 3months   | 8481407-3 | PGR | 5 |
| male   | 8months 13days   | 8484105-4 | PGR | 4 |
| female | 9years 5months   | 735331    | PGR | 7 |

|        |                  |           |     |   |
|--------|------------------|-----------|-----|---|
| male   | 8years 9months   | 485993    | PGR | 7 |
| female | 5years 4months   | 5955434-3 | PGR | 5 |
| male   | 15years          | 8489704-3 | PGR | 5 |
| female | 6years 2months   | 8396749-3 | PGR | 5 |
| male   | 3years 3months   | 6976160-4 | PGR | 4 |
| male   | 11years 4months  | 6913208-4 | PGR | 5 |
| female | 2years 2months   | 7958609-4 | PGR | 5 |
| male   | 5years 7months   | 7036522-4 | PGR | 5 |
| male   | 9years 11months  | 734930    | PGR | 7 |
| male   | 10years 4months  | 735360    | PGR | 5 |
| female | 5years 10months  | 735356    | PGR | 5 |
| female | 12years 6months  | 565555    | PGR | 6 |
| male   | 7years 6months   | 4758925-4 | PGR | 6 |
| male   | 2years           | 8488316-3 | PGR | 4 |
| female | 5years 1months   | 734969    | PGR | 5 |
| male   | 8years 3months   | 671524    | PGR | 5 |
| female | 14years          | 709824    | PGR | 5 |
| female | 8years 9months   | 736602    | PGR | 7 |
| female | 12years 11months | 735586    | PGR | 4 |
| male   | 4years 3months   | 736663    | PGR | 4 |
| male   | 13years          | 735633    | PGR | 6 |
| female | 11years          | 735628    | PGR | 5 |
| male   | 8years 7months   | 735640    | PGR | 5 |
| male   | 4years 4months   | 8469850-3 | PGR | 4 |
| female | 6years 3months   | 8393264-3 | PGR | 5 |
| female | 4years 8months   | 736624    | PGR | 6 |
| male   | 1years 11months  | 7700335-3 | PGR | 4 |
| female | 9years 10months  | 735717    | PGR | 5 |
| female | 9years 1months   | 735725    | PGR | 5 |
| female | 7years 8months   | 736671    | PGR | 5 |

|        |                  |           |     |   |
|--------|------------------|-----------|-----|---|
| male   | 4years 1months   | 7854420-3 | PGR | 4 |
| female | 3years 5months   | 7406575-2 | PGR | 4 |
| male   | 14years          | 735803    | PGR | 6 |
| female | 12years 3months  | 8498295-4 | PGR | 5 |
| female | 7years 4months   | 735825    | PGR | 6 |
| female | 5years 7months   | 8014305-3 | PGR | 6 |
| male   | 3years 11months  | 6902535-3 | PGR | 7 |
| female | 2years 7months   | 8111330-3 | PGR | 4 |
| male   | 7years 8months   | 453911    | PGR | 3 |
| male   | 11years 10months | 735915    | PGR | 8 |
| female | 11years 8months  | 735940    | PGR | 9 |
| female | 5years           | 736699    | PGR | 6 |
| female | 11years 4months  | 736694    | PGR | 6 |
| male   | 4years 9months   | 735950    | PGR | 5 |
| male   | 4years           | 735853    | PGR | 6 |
| female | 5years 7months   | 8130585-3 | PGR | 3 |
| male   | 2years 2months   | 8497597-3 | PGR | 6 |
| male   | 2years 1months   | 8027591-3 | PGR | 6 |
| female | 5years 6months   | 6088101-4 | PGR | 4 |
| male   | 5months 6days    | 8460775-3 | PGR | 3 |
| male   | 10months 16days  | 7993048-4 | PGR | 7 |
| female | 5years 5months   | 736021    | PGR | 5 |
| male   | 5years 6months   | 735997    | PGR | 6 |
| male   | 4years 2months   | 736055    | PGR | 6 |
| female | 5years 6months   | 736051    | PGR | 7 |
| female | 8years 1months   | 736722    | PGR | 5 |
| female | 5years 7months   | 7883401-3 | PGR | 6 |
| female | 2years 3months   | 7530394-4 | PGR | 6 |
| female | 13years 10months | 736131    | PGR | 6 |
| male   | 11years 11months | 736134    | PGR | 4 |
| male   | 9years 4months   | 432226    | PGR | 5 |
| female | 9years 5months   | 694899    | PGR | 4 |
| male   | 10years 6months  | 736125    | PGR | 5 |
| male   | 3years 9months   | 690876    | PGR | 6 |
| female | 10years 6months  | 736156    | PGR | 6 |



|        |                  |           |     |   |
|--------|------------------|-----------|-----|---|
| male   | 9years 2months   | 736179    | PGR | 6 |
| male   | 12years          | 736177    | PGR | 5 |
| female | 10years 8months  | 736367    | PGR | 5 |
| female | 12years 7months  | 565555    | PGR | 6 |
| male   | 8years 8months   | 736264    | PGR | 3 |
| male   | 2years 2months   | 7564282-3 | PGR | 4 |
| female | 10years 9months  | 736344    | PGR | 5 |
| female | 3years 9months   | 575086    | PGR | 5 |
| male   | 3years 8months   | 736243    | PGR | 6 |
| male   | 11years 3months  | 736287    | PGR | 5 |
| male   | 1years 5months   | 7816190-3 | PGR | 4 |
| male   | 10years 3months  | 736396    | PGR | 6 |
| male   | 8years 4months   | 697483    | PGR | 6 |
| female | 7years 11months  | 737023    | PGR | 4 |
| male   | 3years 3months   | 8228576-3 | PGR | 4 |
| male   | 11years          | 736443    | PGR | 5 |
| male   | 8years 9months   | 737083    | PGR | 4 |
| male   | 10years 1months  | 291093    | PGR | 7 |
| male   | 8years 7months   | 737087    | PGR | 5 |
| male   | 10years 4months  | 573721    | PGR | 6 |
| female | 5years 4months   | 651754    | PGR | 4 |
| male   | 7years 1months   | 5999584-3 | PGR | 5 |
| male   | 1years 5months   | 7809233-3 | PGR | 3 |
| female | 14years          | 737220    | PGR | 6 |
| male   | 10years          | 737204    | PGR | 6 |
| male   | 7years 3months   | 418580    | PGR | 6 |
| female | 3months 18days   | 737251    | PGR | 1 |
| female | 11years 8months  | 8506663-3 | PGR | 5 |
| male   | 12years 7months  | 737435    | PGR | 4 |
| male   | 9years 9months   | 737357    | PGR | 8 |
| male   | 10years 10months | 737376    | PGR | 7 |
| male   | 4years           | 736539    | PGR | 8 |
| male   | 9years 9months   | 737438    | PGR | 9 |
| female | 7years 1months   | 737491    | PGR | 3 |
| male   | 10years          | 737486    | PGR | 4 |

|        |                  |           |     |   |
|--------|------------------|-----------|-----|---|
| male   | 7years 10months  | 737479    | PGR | 5 |
| male   | 5years 2months   | 737499    | PGR | 3 |
| male   | 4years 4months   | 736506    | PGR | 4 |
| male   | 7years 4months   | 737474    | PGR | 5 |
| male   | 9years 8months   | 513246    | PGR | 4 |
| female | 15years          | 656848    | PGR | 8 |
| female | 11years 6months  | 437867    | PGR | 4 |
| male   | 1years 7months   | 8002534-3 | PGR | 4 |
| female | 15years          | 736898    | PGR | 6 |
| male   | 5years 1months   | 736822    | PGR | 4 |
| female | 14years          | 737627    | PGR | 3 |
| male   | 9years 9months   | 704315    | PGR | 4 |
| male   | 7years 3months   | 7340966-4 | PGR | 7 |
| male   | 1years 7months   | 8422909-3 | PGR | 4 |
| male   | 10years 10months | 737743    | PGR | 6 |
| female | 4years 11months  | 8253258-3 | PGR | 5 |
| male   | 11years 9months  | 737638    | PGR | 7 |
| male   | 10years 8months  | 737766    | PGR | 4 |
| male   | 3years 2months   | 7657166-3 | PGR | 6 |
| male   | 2years 1months   | 8079167-3 | PGR | 5 |
| male   | 9years 1months   | 738283    | PGR | 6 |
| male   | 9years 11months  | 593589    | PGR | 3 |
| male   | 8years 4months   | 738281    | PGR | 3 |
| male   | 6years 11months  | 738273    | PGR | 4 |
| female | 12years          | 737642    | PGR | 5 |
| female | 5years 9months   | 738357    | PGR | 2 |
| male   | 5years           | 738317    | PGR | 5 |
| female | 7years 4months   | 738340    | PGR | 3 |
| male   | 7years           | 8252647-3 | PGR | 6 |
| male   | 1years 11months  | 8484247-3 | PGR | 5 |

|        |                  |           |     |   |
|--------|------------------|-----------|-----|---|
| male   | 1years 9months   | 8099745-3 | PGR | 5 |
| female | 1years 5months   | 7887432-3 | PGR | 4 |
| male   | 1years           | 738392    | PGR | 4 |
| male   | 9years 8months   | 685471    | PGR | 8 |
| male   | 1years 9months   | 738051    | PGR | 4 |
| female | 6years 4months   | 5912675-3 | PGR | 5 |
| female | 1years 5months   | 738138    | PGR | 5 |
| male   | 7years 6months   | 733900    | PGR | 5 |
| female | 11months 13days  | 8524726-3 | PGR | 5 |
| female | 2years 9months   | 7827089-3 | PGR | 3 |
| male   | 8years 9months   | 738453    | PGR | 3 |
| male   | 6years 8months   | 5673322-4 | PGR | 4 |
| male   | 3years 5months   | 8527333-3 | PGR | 4 |
| male   | 10years 7months  | 738519    | PGR | 5 |
| female | 9years 6months   | 8377981-3 | PGR | 8 |
| male   | 10years 1months  | 738808    | PGR | 5 |
| male   | 10years          | 738517    | PGR | 5 |
| male   | 11years 8months  | 287417    | PGR | 4 |
| female | 4years 10months  | 737948    | PGR | 6 |
| female | 4years           | 566186    | PGR | 6 |
| female | 9years 8months   | 699561    | PGR | 5 |
| female | 10years 11months | 737919    | PGR | 3 |
| male   | 5years 3months   | 8484577-3 | PGR | 4 |
| male   | 6years 10months  | 738628    | PGR | 4 |
| male   | 8years 1months   | 737996    | PGR | 5 |
| female | 5years 4months   | 8539935-3 | PGR | 4 |
| male   | 3years 11months  | 7208827-3 | PGR | 4 |
| female | 7years 10months  | 4890630-4 | PGR | 5 |
| male   | 1years           | 696058    | PGR | 9 |
| female | 1years 11months  | 7664077-3 | PGR | 4 |

|        |                 |           |     |   |
|--------|-----------------|-----------|-----|---|
| female | 4years          | 739552    | PGR | 2 |
| female | 8years 7months  | 739505    | PGR | 4 |
| female | 11years 2months | 739485    | PGR | 3 |
| male   | 4years 10months | 739487    | PGR | 4 |
| female | 13years 4months | 519441    | PGR | 2 |
| male   | 1years          | 8064035-3 | PGR | 5 |
| male   | 1years          | 8070611-3 | PGR | 3 |
| male   | 10years 7months | 739629    | PGR | 6 |
| male   | 10years 9months | 738741    | PGR | 6 |
| male   | 3years 2months  | 739663    | PGR | 3 |
| male   | 1years 1months  | 8542347-3 | PGR | 4 |
| female | 1years 6months  | 8461780-3 | PGR | 4 |
| male   | 11years 3months | 738796    | PGR | 7 |
| male   | 6years 8months  | 681046    | PGR | 8 |
| male   | 9years 1months  | 739763    | PGR | 7 |
| male   | 1years 6months  | 7844749-3 | PGR | 3 |
| female | 3years 10months | 7061283-3 | PGR | 6 |
| female | 4years 2months  | 739832    | PGR | 6 |
| male   | 4years 3months  | 8176924-4 | PGR | 4 |
| male   | 5years 9months  | 740018    | PGR | 3 |
| female | 5years 2months  | 8549086-3 | PGR | 2 |
| male   | 1years 5months  | 7857562-3 | PGR | 4 |
| male   | 2years 1months  | 7669455-3 | PGR | 4 |
| male   | 3years 5months  | 6996721-4 | PGR | 5 |
| female | 8years 3months  | 739840    | PGR | 6 |
| male   | 12years 9months | 739860    | PGR | 4 |
| male   | 5years          | 687670    | PGR | 4 |
| male   | 9years 9months  | 740028    | PGR | 5 |
| male   | 13years 8months | 739883    | PGR | 7 |
| male   | 2years 11months | 699979    | PGR | 5 |
| female | 3years 6months  | 740128    | PGR | 7 |
| female | 9years 6months  | 740095    | PGR | 4 |
| male   | 9years 9months  | 739917    | PGR | 5 |
| female | 4years 10months | 740256    | PGR | 5 |
| male   | 8years 11months | 740263    | PGR | 6 |
| male   | 1years 8months  | 8002534-3 | PGR | 4 |
| female | 2years 1months  | 7826198-3 | PGR | 4 |

|        |                 |           |     |   |
|--------|-----------------|-----------|-----|---|
| female | 5years 8months  | 740348    | PGR | 2 |
| male   | 8years 5months  | 740318    | PGR | 4 |
| male   | 8years 10months | 740368    | PGR | 4 |
| female | 4years 6months  | 8481743-3 | PGR | 4 |
| female | 8years 2months  | 372345    | PGR | 4 |
| female | 6years 9months  | 740428    | PGR | 4 |
| male   | 11years 9months | 739969    | PGR | 8 |
| female | 11years 3months | 555302    | PGR | 6 |
| male   | 10years 3months | 740533    | PGR | 4 |
| male   | 11years 9months | 740517    | PGR | 4 |
| male   | 1years 3months  | 740463    | PGR | 4 |
| female | 10years 8months | 740581    | PGR | 4 |
| male   | 10years 6months | 716969    | PGR | 6 |
| male   | 5years          | 714459    | PGR | 5 |
| male   | 7years 2months  | 8386167-2 | PGR | 4 |
| female | 2years          | 8397473-3 | PGR | 5 |
| male   | 4years 8months  | 740607    | PGR | 5 |
| male   | 3years          | 7528499-3 | PGR | 5 |
| male   | 5years 3months  | 530024    | PGR | 5 |
| female | 4years 5months  | 740781    | PGR | 5 |
| female | 9years 8months  | 740782    | PGR | 5 |
| male   | 8years 9months  | 740830    | PGR | 4 |
| female | 10years 1months | 318909    | PGR | 4 |
| female | 8years 10months | 6923614-4 | PGR | 8 |
| male   | 4years 7months  | 6310951-2 | PGR | 4 |
| female | 2years 10months | 8151430-3 | PGR | 4 |
| male   | 7years 3months  | 740928    | PGR | 6 |
| male   | 7years 10months | 445834    | PGR | 4 |
| male   | 9years 6months  | 739990    | PGR | 4 |
| female | 11years 9months | 741476    | PGR | 4 |
| female | 4years 5months  | 8562509-3 | PGR | 3 |
| female | 10years 2months | 8563456-3 | PGR | 6 |
| male   | 8years 5months  | 8566119-4 | PGR | 4 |
| male   | 3years          | 7157809-2 | PGR | 3 |
| female | 2years 7months  | 8562491-3 | PGR | 5 |

|        |                  |           |     |   |
|--------|------------------|-----------|-----|---|
| male   | 8years 1months   | 7317065-3 | PGR | 4 |
| female | 2years           | 8483891-3 | PGR | 5 |
| male   | 11years 4months  | 741012    | PGR | 5 |
| female | 8years 10months  | 740623    | PGR | 5 |
| male   | 12years 10months | 5807995-3 | PGR | 4 |
| male   | 3years 2months   | 7905171-3 | PGR | 3 |
| female | 5years 3months   | 7549931-3 | PGR | 4 |
| male   | 11years 10months | 741528    | PGR | 8 |
| female | 11years 2months  | 741098    | PGR | 5 |
| male   | 10years 4months  | 741120    | PGR | 3 |
| male   | 6years 10months  | 451260    | PGR | 7 |
| male   | 1years 6months   | 7928194-3 | PGR | 4 |
| male   | 7years 3months   | 7935946-3 | PGR | 6 |
| male   | 3years 1months   | 8066108-3 | PGR | 2 |
| female | 9years 11months  | 7606822-3 | PGR | 4 |
| male   | 6years 3months   | 615850    | PGR | 2 |
| female | 11years 4months  | 741153    | PGR | 6 |
| male   | 10years 6months  | 8571456-4 | PGR | 4 |
| male   | 2years 5months   | 8564437-3 | PGR | 6 |
| male   | 9years 2months   | 4684142-4 | PGR | 4 |
| male   | 5years 3months   | 8539342-3 | PGR | 5 |
| male   | 15years          | 6349450-4 | PGR | 4 |
| male   | 13years 5months  | 3425684-4 | PGR | 5 |
| male   | 7years 8months   | 7269704-4 | PGR | 5 |
| female | 6years 3months   | 741604    | PGR | 3 |
| male   | 10years 1months  | 8570761-3 | PGR | 6 |
| female | 13years 8months  | 7216644-4 | PGR | 7 |
| female | 2years 3months   | 7806898-3 | PGR | 5 |
| male   | 12years 11months | 8355854-3 | PGR | 6 |
| female | 1years 11months  | 741804    | PGR | 4 |
| male   | 13years 10months | 741599    | PGR | 4 |
| male   | 4years 7months   | 741211    | PGR | 4 |
| male   | 10years 4months  | 741812    | PGR | 3 |
| male   | 9years 5months   | 320132    | PGR | 4 |
| male   | 8years 2months   | 5875206-3 | PGR | 5 |

|        |                 |           |     |   |
|--------|-----------------|-----------|-----|---|
| female | 6years 1months  | 741201    | PGR | 8 |
| female | 9years 3months  | 7706671-3 | PGR | 4 |
| female | 7years 11months | 5716282-4 | PGR | 5 |
| male   | 4years 6months  | 6752916-3 | PGR | 5 |
| male   | 8years 3months  | 8566786-3 | PGR | 3 |
| female | 1years 6months  | 8572705-3 | PGR | 8 |
| male   | 10years 1months | 737204    | PGR | 8 |
| male   | 10years 6months | 741915    | PGR | 6 |
| male   | 1years          | 8071229-3 | PGR | 5 |
| male   | 1years 10months | 8234743-3 | PGR | 5 |
| male   | 7years 5months  | 7061771-4 | PGR | 4 |
| female | 5years 6months  | 7853104-3 | PGR | 4 |
| female | 9years 8months  | 8038114-3 | PGR | 7 |
| male   | 12years 4months | 4460404-4 | PGR | 6 |
| female | 6years 10months | 5814599-3 | PGR | 6 |
| female | 10years 9months | 741953    | PGR | 5 |
| female | 9months 22days  | 8393940-3 | PGR | 3 |
| female | 9years 11months | 741975    | PGR | 3 |
| male   | 6years 10months | 741989    | PGR | 5 |
| female | 9years 2months  | 741986    | PGR | 4 |
| female | 6years 5months  | 5317772-4 | PGR | 4 |
| male   | 5years 10months | 5807527-4 | PGR | 4 |
| male   | 2years 2months  | 7623734-3 | PGR | 5 |
| female | 10years         | 8049940-3 | PGR | 4 |
| female | 8years 10months | 6234043-4 | PGR | 6 |
| male   | 7years 10months | 8573764-3 | PGR | 5 |
| male   | 12years 2months | 8416703-4 | PGR | 5 |
| male   | 3years 5months  | 7832688-3 | PGR | 4 |
| female | 11years 1months | 4016087-2 | PGR | 3 |
| male   | 10years 1months | 7824021-3 | PGR | 4 |
| male   | 4years 10months | 6204401-3 | PGR | 3 |
| male   | 12years         | 741301    | PGR | 5 |
| female | 8years          | 465509    | PGR | 4 |

|        |                  |           |     |   |
|--------|------------------|-----------|-----|---|
| male   | 2years           | 741297    | PGR | 4 |
| male   | 9years 6months   | 6303063-4 | PGR | 5 |
| male   | 10years 1months  | 4635818-2 | PGR | 5 |
| male   | 10years 11months | 742615    | PGR | 6 |
| female | 9years 6months   | 8291017-3 | PGR | 6 |
| male   | 1years 8months   | 8398730-4 | PGR | 6 |
| female | 13years 6months  | 730049    | PGR | 3 |
| female | 8years 2months   | 4229505-4 | PGR | 6 |
| male   | 5years 8months   | 5863753-4 | PGR | 4 |
| male   | 4years           | 741331    | PGR | 3 |
| male   | 4years 7months   | 694675    | PGR | 6 |
| male   | 13years 2months  | 3420198-4 | PGR | 5 |
| female | 3years           | 8585450-3 | PGR | 5 |
| male   | 13years 1months  | 7417535-3 | PGR | 5 |
| male   | 6years 3months   | 6812388-4 | PGR | 4 |
| female | 5years           | 8583335-3 | PGR | 3 |
| male   | 10years 11months | 601323    | PGR | 5 |
| male   | 1years 7months   | 8580521-3 | PGR | 5 |
| female | 11years 5months  | 7168246-4 | PGR | 5 |
| female | 9years 5months   | 7380658-3 | PGR | 5 |
| male   | 9years 3months   | 742976    | PGR | 8 |
| male   | 3years 4months   | 7578600-4 | PGR | 4 |
| male   | 16years          | 7012394-3 | PGR | 6 |
| female | 10years 8months  | 8587486-3 | PGR | 6 |
| male   | 15years          | 4744969-4 | PGR | 4 |
| male   | 17years          | 4860162-4 | PGR | 5 |
| male   | 9years 2months   | 6993257-4 | PGR | 5 |
| male   | 8years 4months   | 4468028-2 | PGR | 5 |
| female | 1years 9months   | 7642276-3 | PGR | 4 |
| male   | 10years 5months  | 3491683-4 | PGR | 5 |
| female | 6years 11months  | 8419828-3 | PGR | 4 |
| female | 2years 5months   | 7637344-3 | PGR | 4 |



|        |                  |           |     |   |
|--------|------------------|-----------|-----|---|
| male   | 9years 11months  | 743168    | PGR | 4 |
| female | 3years           | 743145    | PGR | 4 |
| male   | 5years 2months   | 6035195-4 | PGR | 5 |
| female | 9years 8months   | 8285396-3 | PGR | 4 |
| female | 8years 8months   | 6574408-4 | PGR | 4 |
| male   | 9months 16days   | 8591481-3 | PGR | 5 |
| male   | 13years 1months  | 743100    | PGR | 8 |
| female | 12years 3months  | 6560448-2 | PGR | 4 |
| male   | 1years 6months   | 8413216-3 | PGR | 5 |
| male   | 6years           | 8563331-3 | PGR | 4 |
| male   | 4years 3months   | 8531549-4 | PGR | 4 |
| male   | 9months 15days   | 8322947-3 | PGR | 5 |
| male   | 6years 3months   | 8429776-3 | PGR | 4 |
| female | 5years 2months   | 8561203-3 | PGR | 4 |
| male   | 6years 2months   | 6610134-3 | PGR | 4 |
| male   | 4years 2months   | 8593757-3 | PGR | 2 |
| male   | 3years 8months   | 657178    | PGR | 2 |
| male   | 5years 4months   | 723978    | PGR | 5 |
| female | 12years 4months  | 8599376-3 | PGR | 4 |
| male   | 12years 8months  | 8045140-2 | PGR | 4 |
| male   | 7years 6months   | 8597982-3 | PGR | 6 |
| male   | 15years          | 4648001-2 | PGR | 4 |
| female | 7years 4months   | 743501    | PGR | 4 |
| female | 1years           | 8274719-3 | PGR | 3 |
| male   | 1years 7months   | 7992197-3 | PGR | 4 |
| male   | 5years 4months   | 7069685-3 | PGR | 4 |
| male   | 1years 7months   | 7809233-3 | PGR | 4 |
| female | 4years 8months   | 7074547-4 | PGR | 5 |
| female | 6years 5months   | 6226016-3 | PGR | 4 |
| female | 7years 3months   | 6559353-3 | PGR | 5 |
| female | 4years 6months   | 7407709-3 | PGR | 3 |
| male   | 2years 9months   | 7693775-3 | PGR | 5 |
| female | 9years 8months   | 6100824-4 | PGR | 4 |
| male   | 5years 11months  | 6685050-3 | PGR | 5 |
| female | 12years 11months | 6925348-4 | PGR | 6 |
| male   | 6years 1months   | 6233643-3 | PGR | 5 |
| male   | 5years 3months   | 7302119-3 | PGR | 3 |
| male   | 7years           | 8286162-3 | PGR | 2 |
| male   | 2years 5months   | 8599726-3 | PGR | 3 |

|        |                  |           |     |    |
|--------|------------------|-----------|-----|----|
| female | 5years 9months   | 6674307-4 | PGR | 3  |
| female | 5years 6months   | 5999826-4 | PGR | 5  |
| female | 7years 11months  | 6930717-3 | PGR | 5  |
| male   | 4years 1months   | 7332885-4 | PGR | 4  |
| male   | 4years 6months   | 8162834-3 | PGR | 5  |
| female | 6years 3months   | 5272491-4 | PGR | 3  |
| female | 7years 7months   | 8606798-3 | PGR | 4  |
| male   | 1years 10months  | 8600861-3 | PGR | 4  |
| female | 7years 3months   | 4914444-4 | PGR | 5  |
| male   | 4years 9months   | 6315082-3 | PGR | 4  |
| male   | 11years 4months  | 244159    | PGR | 6  |
| female | 10months 25days  | 8599018-3 | PGR | 7  |
| male   | 8years 1months   | 8610418-4 | PGR | 4  |
| male   | 7years 9months   | 7044552-4 | PGR | 5  |
| female | 4years 5months   | 6513070-4 | PGR | 3  |
| male   | 1years 7months   | 7859067-3 | PGR | 6  |
| male   | 8years 2months   | 8133457-4 | PGR | 8  |
| male   | 11years 10months | 8474394-3 | PGR | 6  |
| female | 2years 11months  | 7865203-3 | PGR | 4  |
| female | 11months 7days   | 8609625-3 | PGR | 4  |
| female | 4years 2months   | 8607176-3 | PGR | 6  |
| male   | 6years           | 8125196-3 | PGR | 6  |
| female | 5years 1months   | 7409124-3 | PGR | 5  |
| female | 2years 4months   | 8611222-3 | PGR | 5  |
| male   | 4years 6months   | 6448193-4 | PGR | 4  |
| male   | 8years 10months  | 7599331-3 | PGR | 5  |
| female | 3years 2months   | 8568875-3 | PGR | 10 |
| female | 7years 3months   | 744869    | PGR | 8  |
| female | 5years 10months  | 8593770-3 | PGR | 4  |
| male   | 6years 2months   | 743933    | PGR | 11 |
| female | 6years 1months   | 5872161-4 | PGR | 6  |
| female | 5years 9months   | 7137780-4 | PGR | 5  |
| male   | 10years 2months  | 7095684-4 | PGR | 5  |
| male   | 5years 8months   | 5887118-4 | PGR | 6  |

|        |                  |           |     |   |
|--------|------------------|-----------|-----|---|
| female | 13years 4months  | 8449682-3 | PGR | 8 |
| female | 1years 11months  | 7603028-3 | PGR | 8 |
| male   | 8years 6months   | 8614252-3 | PGR | 6 |
| female | 2years 2months   | 7629443-3 | PGR | 7 |
| female | 1years 7months   | 7955404-3 | PGR | 7 |
| female | 11months 8days   | 8160887-3 | PGR | 4 |
| male   | 2years 9months   | 7434238-4 | PGR | 7 |
| female | 1years 2months   | 8112394-3 | PGR | 5 |
| male   | 1years 1months   | 8046958-2 | PGR | 4 |
| male   | 3years 7months   | 7080745-3 | PGR | 4 |
| female | 3years 3months   | 8421507-3 | PGR | 6 |
| male   | 2years 3months   | 8611254-3 | PGR | 5 |
| male   | 4years 3months   | 6755996-4 | PGR | 4 |
| female | 3years           | 8318790-3 | PGR | 6 |
| female | 8months 16days   | 8532773-3 | PGR | 5 |
| female | 2years 11months  | 7887922-3 | PGR | 4 |
| male   | 3years 5months   | 7019823-3 | PGR | 7 |
| male   | 1years 6months   | 7937128-3 | PGR | 5 |
| male   | 1years           | 8268358-3 | PGR | 5 |
| male   | 7years 1months   | 745494    | PGR | 6 |
| male   | 11years 7months  | 679798    | PGR | 4 |
| female | 7years 6months   | 744360    | PGR | 7 |
| male   | 6years 11months  | 744381    | PGR | 3 |
| male   | 10years 9months  | 739629    | PGR | 9 |
| female | 1years 6months   | 8358387-3 | PGR | 6 |
| female | 3years 6months   | 745206    | PGR | 3 |
| male   | 10months 17days  | 8621673-3 | PGR | 4 |
| male   | 12years 11months | 685434    | PGR | 5 |
| male   | 6years 8months   | 745734    | PGR | 8 |
| male   | 8years 8months   | 727590    | PGR | 7 |
| male   | 8years 3months   | 7991156-3 | PGR | 6 |
| male   | 1years 5months   | 8542468-4 | PGR | 4 |
| male   | 1years 2months   | 7987977-2 | PGR | 4 |
| male   | 6years 11months  | 8622426-4 | PGR | 5 |
| male   | 3years           | 7407414-3 | PGR | 4 |

|        |                  |           |     |   |
|--------|------------------|-----------|-----|---|
| male   | 6years 10months  | 7745138-3 | PGR | 5 |
| female | 3years 5months   | 7184297-3 | PGR | 4 |
| female | 6years 4months   | 8617138-3 | PGR | 5 |
| male   | 4years 6months   | 6670544-3 | PGR | 4 |
| male   | 11years 3months  | 8618453-2 | PGR | 7 |
| male   | 5years 4months   | 8446218-3 | PGR | 7 |
| female | 5years 8months   | 8023945-3 | PGR | 4 |
| male   | 4years 3months   | 745618    | PGR | 5 |
| female | 7years 3months   | 4684221-4 | PGR | 3 |
| female | 2years 3months   | 8043918-4 | PGR | 5 |
| male   | 10years 2months  | 8491930-3 | PGR | 6 |
| male   | 2years 4months   | 7564646-4 | PGR | 4 |
| female | 1years 2months   | 8618277-3 | PGR | 5 |
| male   | 3years 1months   | 7157323-3 | PGR | 4 |
| female | 6years 3months   | 7326971-3 | PGR | 5 |
| male   | 2years 2months   | 7804096-3 | PGR | 3 |
| female | 4years 7months   | 6457939-3 | PGR | 2 |
| male   | 6years           | 8362250-3 | PGR | 6 |
| male   | 6years           | 5957902-2 | PGR | 3 |
| male   | 6years 10months  | 8626438-3 | PGR | 2 |
| male   | 5years           | 8201103-3 | PGR | 6 |
| male   | 12years 10months | 8548008-3 | PGR | 5 |
| female | 1years 3months   | 8619190-3 | PGR | 5 |
| female | 5years 9months   | 7813744-3 | PGR | 4 |
| male   | 8months 28days   | 8624594-3 | PGR | 5 |
| male   | 3years 11months  | 7622537-3 | PGR | 4 |
| female | 1years 8months   | 692971    | PGR | 3 |
| female | 9years 11months  | 3615042-4 | PGR | 5 |
| male   | 12years          | 8624470-3 | PGR | 4 |
| female | 1years 3months   | 7985126-3 | PGR | 4 |
| female | 13years 6months  | 5637734-4 | PGR | 4 |
| male   | 10years          | 6719981-3 | PGR | 6 |
| female | 6years 11months  | 7663895-3 | PGR | 6 |

|        |                  |           |     |    |
|--------|------------------|-----------|-----|----|
| female | 4years 1months   | 7564676-3 | PGR | 6  |
| male   | 6years 10months  | 7983004-3 | PGR | 5  |
| female | 9years 3months   | 8628888-3 | PGR | 6  |
| male   | 6years 3months   | 8629823-3 | PGR | 4  |
| male   | 17years          | 8090268-3 | PGR | 6  |
| male   | 8years 2months   | 7509974-3 | PGR | 8  |
| male   | 9years 11months  | 8630839-4 | PGR | 6  |
| female | 4years 3months   | 6589939-4 | PGR | 4  |
| male   | 10months 26days  | 8155717-4 | PGR | 6  |
| female | 8years 5months   | 6883071-3 | PGR | 6  |
| female | 15years          | 6028392-4 | PGR | 4  |
| female | 6years 2months   | 5321669-4 | PGR | 5  |
| male   | 7years 2months   | 5729518-4 | PGR | 10 |
| male   | 5years 9months   | 8568162-3 | PGR | 4  |
| male   | 5years 8months   | 5942737-3 | PGR | 5  |
| male   | 9years 2months   | 739763    | PGR | 9  |
| male   | 17years          | 746503    | PGR | 7  |
| female | 6years 5months   | 746451    | PGR | 4  |
| female | 4years 11months  | 6367641-4 | PGR | 5  |
| male   | 6years 10months  | 5231242-4 | PGR | 7  |
| female | 10years 11months | 8632899-3 | PGR | 6  |
| male   | 1years 9months   | 7757173-3 | PGR | 5  |
| male   | 7years           | 8376038-4 | PGR | 6  |
| male   | 8years 10months  | 8633137-4 | PGR | 5  |
| female | 1years 6months   | 8016188-3 | PGR | 6  |
| male   | 1years 9months   | 8595220-3 | PGR | 5  |
| female | 7months 8days    | 8394125-4 | PGR | 5  |
| male   | 4years 5months   | 7355877-3 | PGR | 4  |
| male   | 2years 1months   | 8626872-3 | PGR | 5  |
| male   | 10years          | 710483    | PGR | 8  |
| female | 9years 10months  | 315796    | PGR | 4  |
| female | 4months 21days   | 8464356-3 | PGR | 4  |
| female | 2years 3months   | 7663593-3 | PGR | 5  |
| male   | 3years 5months   | 7573498-3 | PGR | 4  |
| female | 10years 1months  | 6216431-4 | PGR | 6  |
| male   | 2years 11months  | 8320937-3 | PGR | 4  |
| male   | 3years 10months  | 8161720-3 | PGR | 5  |
| male   | 2years 5months   | 7636660-3 | PGR | 6  |

|        |                 |           |     |   |
|--------|-----------------|-----------|-----|---|
| male   | 12years 1months | 6264265-4 | PGR | 6 |
| male   | 9years          | 8401090-3 | PGR | 5 |
| male   | 5years 10months | 746305    | PGR | 4 |
| female | 2years 7months  | 682385    | PGR | 4 |
| female | 12years 1months | 8636395-3 | PGR | 5 |
| female | 4years 8months  | 6470658-4 | PGR | 6 |
| male   | 1years 1months  | 8490291-4 | PGR | 4 |
| female | 5years 6months  | 5962782-3 | PGR | 4 |
| male   | 13years 3months | 8361572-3 | PGR | 5 |
| female | 6years 2months  | 8630236-4 | PGR | 4 |
| female | 2years 6months  | 8636257-3 | PGR | 6 |
| female | 1years 1months  | 8059365-4 | PGR | 5 |
| male   | 2years 6months  | 8450355-3 | PGR | 5 |
| male   | 1years 7months  | 7915371-3 | PGR | 5 |
| female | 1years 1months  | 8637517-3 | PGR | 5 |
| female | 1years 3months  | 8571390-3 | PGR | 3 |
| female | 5years 3months  | 6716259-4 | PGR | 4 |
| male   | 12years 2months | 746280    | PGR | 3 |
| male   | 8years 7months  | 4276495-2 | PGR | 6 |
| female | 8years 1months  | 8613207-3 | PGR | 6 |
| female | 10months 14days | 8632785-3 | PGR | 4 |
| male   | 8years 10months | 4194774-4 | PGR | 4 |
| female | 5years 7months  | 6105137-4 | PGR | 3 |
| male   | 12years 7months | 747153    | PGR | 5 |
| female | 5years 8months  | 6027170-4 | PGR | 8 |
| female | 5years 6months  | 8465260-3 | PGR | 4 |
| male   | 5years 3months  | 8643850-3 | PGR | 5 |
| male   | 2years 10months | 7530635-4 | PGR | 4 |
| female | 13years 6months | 8640496-3 | PGR | 6 |
| female | 13years 8months | 7916457-3 | PGR | 5 |
| female | 10months 15days | 8369858-3 | PGR | 5 |
| male   | 3years 2months  | 7187575-3 | PGR | 4 |
| male   | 13years         | 4790841-4 | PGR | 3 |
| female | 4years 8months  | 6579522-3 | PGR | 6 |
| male   | 6years 2months  | 5699950-2 | PGR | 5 |
| male   | 7years 5months  | 4644751-4 | PGR | 6 |
| male   | 6years 7months  | 4948756-4 | PGR | 4 |
| female | 2years 11months | 7203528-3 | PGR | 3 |
| female | 6years          | 6782403-4 | PGR | 6 |
| female | 5years 3months  | 8402964-3 | PGR | 3 |
| male   | 8years 11months | 8644601-3 | PGR | 6 |
| male   | 5years 6months  | 6941026-3 | PGR | 5 |

|        |                  |           |     |   |
|--------|------------------|-----------|-----|---|
| female | 4months 16days   | 8511999-3 | PGR | 3 |
| male   | 2years 5months   | 7945940-3 | PGR | 5 |
| female | 9years 3months   | 747537    | PGR | 4 |
| male   | 1years 6months   | 7819530-3 | PGR | 3 |
| male   | 10years          | 747264    | PGR | 5 |
| female | 4years 2months   | 8641535-3 | PGR | 3 |
| female | 8years 2months   | 8639703-3 | PGR | 4 |
| male   | 1years 2months   | 8101561-3 | PGR | 6 |
| male   | 9years 5months   | 8603846-3 | PGR | 5 |
| male   | 9years 6months   | 8647485-3 | PGR | 4 |
| male   | 7months 19days   | 8431029-3 | PGR | 4 |
| female | 11years          | 747687    | PGR | 4 |
| female | 7years 7months   | 747649    | PGR | 4 |
| male   | 5years 7months   | 8282543-3 | PGR | 5 |
| male   | 2years 7months   | 7543735-3 | PGR | 5 |
| male   | 7months 24days   | 8648973-4 | PGR | 3 |
| male   | 7years 8months   | 8648516-3 | PGR | 9 |
| female | 1years 7months   | 8646399-3 | PGR | 8 |
| female | 9years 4months   | 8648248-3 | PGR | 5 |
| male   | 5years 3months   | 7031114-3 | PGR | 6 |
| male   | 7years           | 8613123-3 | PGR | 7 |
| male   | 5months 11days   | 8647560-3 | PGR | 3 |
| male   | 1years 5months   | 8649845-3 | PGR | 5 |
| female | 4years           | 8643832-3 | PGR | 5 |
| female | 1years 5months   | 8160845-3 | PGR | 4 |
| female | 4years 4months   | 6557528-4 | PGR | 4 |
| female | 2years           | 8650470-3 | PGR | 4 |
| male   | 13years 5months  | 747894    | PGR | 4 |
| male   | 3years 11months  | 8646600-3 | PGR | 6 |
| female | 5years 3months   | 6272559-3 | PGR | 6 |
| male   | 11years 10months | 8651938-3 | PGR | 5 |
| male   | 10years 10months | 3400369-4 | PGR | 4 |
| male   | 10years          | 747902    | PGR | 6 |
| male   | 4years 6months   | 6774599-3 | PGR | 6 |
| female | 3years 1months   | 7444116-3 | PGR | 4 |
| male   | 6years 4months   | 7877186-3 | PGR | 6 |
| male   | 4years 10months  | 6376495-3 | PGR | 6 |
| female | 7years 9months   | 8061873-3 | PGR | 4 |

|        |                  |           |     |   |
|--------|------------------|-----------|-----|---|
| male   | 4years 4months   | 8628323-3 | PGR | 6 |
| female | 12years 10months | 8515190-3 | PGR | 4 |
| male   | 8years 3months   | 7727173-3 | PGR | 5 |
| female | 9years           | 8476453-3 | PGR | 3 |
| female | 3years 5months   | 7169763-4 | PGR | 4 |
| male   | 9years 4months   | 3847896-4 | PGR | 6 |
| female | 8years 3months   | 7029393-4 | PGR | 4 |
| female | 5years 1months   | 8032718-3 | PGR | 6 |
| male   | 8years 3months   | 4296587-4 | PGR | 6 |
| female | 4years 7months   | 6714047-4 | PGR | 5 |
| male   | 4years 4months   | 8654652-3 | PGR | 5 |
| male   | 9years 5months   | 5774838-4 | PGR | 5 |
| male   | 5years 4months   | 7247586-3 | PGR | 4 |
| female | 1years 4months   | 8006026-3 | PGR | 5 |
| female | 10months 14days  | 8649194-3 | PGR | 4 |
| male   | 2years 6months   | 7554962-3 | PGR | 4 |
| female | 6years 7months   | 7811235-3 | PGR | 4 |
| female | 5years 3months   | 8657382-4 | PGR | 6 |
| female | 6years 10months  | 8657700-4 | PGR | 5 |
| female | 5years 6months   | 7439697-3 | PGR | 6 |
| male   | 4years 5months   | 6541630-3 | PGR | 6 |
| male   | 8years 6months   | 8641922-4 | PGR | 6 |
| male   | 4years 3months   | 6846177-4 | PGR | 5 |
| female | 4years 6months   | 8657753-4 | PGR | 5 |
| female | 2years 9months   | 8206729-3 | PGR | 5 |
| female | 1years 3months   | 8117792-3 | PGR | 4 |
| female | 1years 9months   | 7946087-3 | PGR | 4 |
| female | 8months 3days    | 8438201-3 | PGR | 5 |
| male   | 5years 2months   | 8222590-3 | PGR | 4 |
| female | 12years 5months  | 748374    | PGR | 4 |
| male   | 3years 2months   | 7555992-3 | PGR | 5 |
| female | 3years 7months   | 7101623-3 | PGR | 5 |



|        |                  |           |     |    |
|--------|------------------|-----------|-----|----|
| female | 4years 3months   | 7063918-3 | PGR | 5  |
| male   | 3years           | 8654362-3 | PGR | 4  |
| male   | 7years 6months   | 7624508-3 | PGR | 3  |
| female | 5years           | 7964228-3 | PGR | 5  |
| female | 1years 5months   | 8658243-3 | PGR | 5  |
| male   | 4years 5months   | 7921165-3 | PGR | 5  |
| male   | 1years 7months   | 8654593-3 | PGR | 4  |
| male   | 4years 4months   | 6573265-4 | PGR | 5  |
| male   | 4years 9months   | 8655578-3 | PGR | 5  |
| female | 5years 10months  | 8657718-3 | PGR | 6  |
| female | 13years 10months | 8659647-3 | PGR | 6  |
| male   | 4years 7months   | 748456    | PGR | 4  |
| male   | 9years 5months   | 8635053-3 | PGR | 6  |
| male   | 9years 9months   | 8104550-3 | PGR | 5  |
| female | 7years 3months   | 7416431-4 | PGR | 5  |
| male   | 5years 7months   | 7216394-4 | PGR | 6  |
| female | 2years 4months   | 7502953-3 | PGR | 5  |
| female | 2years 4months   | 7787062-3 | PGR | 6  |
| male   | 7years 4months   | 4676727-4 | PGR | 6  |
| female | 3years 8months   | 747555    | PGR | 10 |
| female | 9years 2months   | 748652    | PGR | 5  |
| male   | 2years 2months   | 748516    | PGR | 5  |
| male   | 10years 8months  | 748117    | PGR | 4  |
| male   | 6years 1months   | 6120913-4 | PGR | 3  |
| male   | 1years 3months   | 8024426-3 | PGR | 4  |
| female | 6months 20days   | 8663625-3 | PGR | 6  |
| male   | 1years 5months   | 8052974-3 | PGR | 7  |
| male   | 1years 9months   | 8299891-3 | PGR | 5  |
| female | 9years 10months  | 8633701-3 | PGR | 7  |
| female | 4years 7months   | 6465219-4 | PGR | 6  |
| female | 4years 7months   | 8668237-4 | PGR | 5  |
| female | 8years 10months  | 749174    | PGR | 5  |
| female | 4years 9months   | 8481778-3 | PGR | 4  |

|        |                  |           |     |   |
|--------|------------------|-----------|-----|---|
| female | 7years 9months   | 8668429-4 | PGR | 5 |
| male   | 5years 2months   | 6263825-4 | PGR | 4 |
| male   | 6years 8months   | 5286686-4 | PGR | 6 |
| male   | 5years 11months  | 7198866-3 | PGR | 4 |
| male   | 13years 9months  | 749412    | PGR | 3 |
| female | 4years 6months   | 749422    | PGR | 4 |
| female | 3years 7months   | 6992379-3 | PGR | 6 |
| male   | 12years 3months  | 4907018-4 | PGR | 4 |
| female | 4years 6months   | 6985118-3 | PGR | 6 |
| female | 6years 9months   | 7024667-3 | PGR | 6 |
| female | 3years 6months   | 8475434-3 | PGR | 7 |
| female | 3years           | 749500    | PGR | 9 |
| female | 9years 8months   | 749484    | PGR | 6 |
| male   | 9years 9months   | 8671059-3 | PGR | 5 |
| male   | 3years 2months   | 7100762-3 | PGR | 3 |
| female | 5years 3months   | 6655201-4 | PGR | 6 |
| female | 6years 8months   | 8177953-3 | PGR | 4 |
| female | 1years 11months  | 7608937-4 | PGR | 4 |
| female | 7years 11months  | 5227073-4 | PGR | 4 |
| female | 16years          | 746957    | PGR | 2 |
| male   | 11years 1months  | 8671244-3 | PGR | 6 |
| female | 9years 3months   | 6285997-3 | PGR | 5 |
| male   | 13years 9months  | 749412    | PGR | 4 |
| female | 6years 9months   | 5278895-4 | PGR | 6 |
| female | 4months 26days   | 8672467-3 | PGR | 3 |
| male   | 11years 11months | 749591    | PGR | 5 |
| female | 6years           | 6975339-4 | PGR | 5 |
| female | 5years 4months   | 8672774-3 | PGR | 5 |
| female | 10years 2months  | 3636493-2 | PGR | 6 |
| male   | 8years 2months   | 6255604-4 | PGR | 5 |
| female | 8months 13days   | 8665592-3 | PGR | 4 |
| female | 4years 2months   | 6771386-3 | PGR | 4 |
| male   | 6years 11months  | 5785634-2 | PGR | 5 |
| male   | 3years 1months   | 8671064-4 | PGR | 3 |
| male   | 9years 9months   | 4558036-4 | PGR | 4 |
| male   | 4years 4months   | 7645688-4 | PGR | 5 |

Visiting symptoms

Duodenal bulbar ulcer

vomit

Duodenal bulbar ulcer

abdominalgia

abdominalgia

vomit

vomit

abdominalgia

abdominalgia

abdominalgia

Duodenal bulbar ulcer

abdominalgia

abdominalgia

abdominalgia

vomit

chronic superficial gastritis

abdominalgia

abdominalgia

abdominalgia

abdominalgia

abdominalgia

abdominalgia

abdominalgia

abdominalgia

abdominalgia

vomit

abdominalgia

stomachache

abdominalgia

vomit

Helicobacter pylori infection

abdominalgia

Indigestion

abdominalgia

Duodenal bulbar ulcer

abdominalgia

vomit

abdominalgia

nausea

gastritis

abdominalgia

abdominalgia

abdominalgia

Gastrointestinal bleeding

abdominalgia, vomit

abdominalgia

diarrhea

poor appetite

vomit

abdominalgia

anaemia

abdominalgia

abdominalgia

nausea

vomit

abdominalgia

vomit

abdominalgia, vomit

abdominalgia

abdominalgia

poor appetite

allergic purpura

abdominalgia

abdominalgia

Indigestion

abdominalgia

abdominalgia

abdominalgia

abdominalgia

abdominalgia

Indigestion

abdominalgia

vomit

vomit

poor appetite

abdominalgia

vomit

abdominalgia

gastroenteritis

abdominalgia

halitosis

stomachache

abdominalgia

abdominal distention

nausea

gastroenteritis

abdominalgia

abdominalgia

Helicobacter pylori infection相关性

abdominalgia

abdominalgia

abdominalgia

Helicobacter pylori infection

abdominalgia

abdominalgia

abdominalgia

abdominalgia

abdominalgia

abdominalgia  
abdominalgia  
abdominalgia  
abdominalgia  
malnutrition

abdominalgia

Gastric retention, upper gastroint

abdominalgia

spit blood

abdominalgia

haemafecia

abdominalgia

abdominalgia

abdominalgia

spit blood

abdominalgia

gastritis

abdominalgia

gastritis

allergic purpura

abdominalgia

abdominalgia

chronicgastritis

abdominalgia

abdominalgia

poor appetite

abdominalgiagastritis

gastritis

abdominalgia

gastritis

dysphagia

abdominalgia

gastritis

abdominalgia

vomit

abdominalgia

abdominalgia

allergic purpura

abdominalgia

nausea

peptic ulcer

abdominalgia

abdominalgia

vomit

duodenal ulcer

gastritis

gastritis

abdominalgia, vomit

abdominalgia

vomit

anaemia

duodenal ulcer

duodenal ulcer

abdominalgia

gastritis

abdominalgia

abdominalgia

abdominalgia

abdominalgia

poor appetite

abdominalgia

abdominalgia

gastritis

abdominalgia

abdominalgia

abdominalgia

abdominalgia

abdominalgia

abdominalgia

peptic ulcer

abdominalgia

abdominalgia

vomit

chronic superficial gastritis

haemafecia

abdominalgia

vomit

hiccup

vomit

esophageal stenosis

allergic purpura

food allergy

abdominalgia

abdominalgia(vomit)

abdominalgia

abdominalgia

vomit

Gastrointestinal bleeding

gastritis

spit blood

abdominalgia

gastritis

vomit

vomit

allergic purpura

abdominalgia

abdominalgia

abdominalgia

abdominalgia

vomit

abdominalgia

vomit(abdominalgiahaemafecia)

abdominalgia

abdominalgia

pneumonia

duodenal ulcer

abdominalgia

haemafecia

Helicobacter pylori infection

Gastrointestinal lesions

haemafecia

abdominalgia

abdominalgia

acute gastritis

vomit



gastritis

halitosis

abdominalgia

abdominalgia

abdominalgia

Gastrointestinal bleeding

gastritis

上abdominalgia

vomit

abdominalgia

abdominalgia

gastritis

vomit

abdominalgia

abdominalgia

abdominalgia (haemafecia)

abdominalgia

abdominalgia

abdominalgia

abdominalgia

abdominalgia

abdominalgia

abdominalgia

gastritis

abdominalgia

abdominalgia

abdominalgia

duodenal ulcer

abdominalgia

allergic purpura

abdominalgia

abdominalgia

abdominalgia

vomit

abdominalgia

abdominalgia

duodenal ulcer

vomit

Intestinal flatulence

gastritis

abdominalgia

abdominalgia

vomit

chronicdiarrhea

vomit

abdominalgia

abdominalgia

vomit

vomit

vomit

vomit

allergic purpura

Developmental delay

abdominalgia

Helicobacter pylori infection

vomit(abdominalgia)

duodenal ulcer

abdominalgia

abdominalgia

haemafecia

abdominalgia

abdominalgia

spit blood

vomit

vomit

Indigestion

nausea

gastroenteritis

abdominalgia

abdominalgia

abdominalgia

abdominalgia(, haemafecia)

abdominalgia

Health check-up

Gastrointestinal bleeding

abdominalgia

abdominalgia

abdominalgia

malnutrition

abdominalgia

poor appetite

abdominalgia

abdominalgia

nausea

pyloric channel ulcer

abdominalgia

allergic purpura

vomit(vomit)

epilepsy ESES

abdominalgia

abdominalgia

abdominalgia

abdominalgia

abdominalgia

vomit

abdominalgia

vomit

abdominalgia

abdominalgia

abdominalgia

abdominalgia

abdominalgia

allergic purpura

abdominalgia

abdominalgia

abdominalgia

vomit

abdominalgia

abdominalgia

abdominalgia

abdominalgia

abdominalgia

abdominalgia

haemafecia

malnutrition

abdominalgia

vomit

nausea

vomit

vomit

Gastrointestinal bleeding

vomit

abdominalgia

abdominalgia

abdominalgia

abdominalgia

abdominalgia

abdominalgia

gastritis

abdominalgia

abdominalgia

vomit

abdominalgia, anaemia

spit blood

abdominalgia

vomit

abdominalgia

gastritis

abdominalgia

Developmental delay

abdominalgia

abdominalgia

abdominalgia

abdominalgiaduodenal ulcer

gastritis

allergic purpura

duodenal ulcer

gastritis; Helicobacter pylori inf

abdominalgia

abdominalgia

Indigestion

abdominalgia

acute gastritis

abdominalgia, faint

duodenal ulcer

abdominalgia

duodenal ulcer

abdominalgia

abdominal distention

generate heat

abdominalgia(abdominal distention,

haemafecia

abdominalgia

abdominalgia

abdominalgia

constipation

abdominalgia

abdominalgia

abdominalgia

abdominalgia

abdominalgia

poor appetite

abdominalgia

abdominalgia

abdominalgia

vomit

abdominalgia

abdominalgia

abdominalgia

abdominalgia

abdominalgia

diarrhea

gastritis Multiple gastric polyps

abdominalgia, dysfunction of blood

abdominalgia

abdominalgia

abdominalgia

abdominalgia

abdominalgia

duodenal ulcer

Duodenal bulbar ulcer

nausea

nausea

vomit

vomit

abdominalgia

headache vomit

abdominalgia

poor appetite

abdominalgia

hiccup

abdominalgia(abdominalgia, headac

chronic superficial gastritis

abdominalgia

peptic ulcer

constipation

abdominalgia

vomit

abdominalgia(abdominalgia)

Indigestion

Indigestion

abdominalgia

abdominalgia Mesenteric lymph node

abdominalgia

chronicgastritis(acute )

vomit

abdominal distention(abdominal dis

chronic non-atrophic antral gastri

abdominalgia

allergic purpura

abdominalgia

duodenal ulcer

duodenal ulcer

abdominalgia

vomit

abdominalgia

lose weight

occult penis

malnutrition

nausea

abdominalgia

abdominal distention

Indigestion

abdominalgia

abdominalgia

abdominalgia

abdominalgia

vomit

nausea

Indigestion

abdominalgiaallergic purpura

gastroenteritis

abdominalgia

haemafecia

abdominalgia

faint

abdominalgia

nausea

vomit

gastroenteritis

abdominalgia

malnutrition

abdominalgia

vomit

abdominalgia

abdominalgia(, vomit)

abdominalgia

vomit

abdominalgia

spit blood

duodenal ulcer  
Gastrointestinal bleeding  
vomit  
abdominalgia  
abdominalgia  
gastric ulcer

abdominalgia  
duodenal ulcer

abdominalgiaallergic purpura  
abdominalgia  
cholecystitis  
abdominalgia  
malnutrition  
malnutrition  
abdominalgia  
melena

abdominalgia  
abdominalgia

Allergic purpura

nausea  
gastric ulcer

allergic purpura  
duodenal ulcer

Indigestion

anorexia  
abdominalgia  
spit blood  
abdominalgia  
abdominalgia  
duodenal ulcer  
abdominalgia  
chronicgastroenteritis

anaemia  
vomit  
abdominalgia  
abdominalgia



spit blood

abdominalgia

vomit

vomit

abdominalgia

abdominalgia

respiratory tract infection

abdominalgia

gastritis

peptic ulcer

abdominalgia

abdominalgia

abdominalgia

vomit

abdominalgia

abdominalgia

abdominalgia

abdominalgia

abdominalgia

vomit

Gastrointestinal bleeding

abdominalgia

abdominalgia

gastritis, Duodenitis

chronicgastritis

Indigestion

Indigestion

Liver damage

poor appetite

nausea

abdominalgia

vomit

abdominalgia

abdominalgia

Indigestion

duodenal ulcer

abdominalgia

gastritis  
duodenal ulcer  
abdominalgia  
abdominalgia  
abdominalgia  
abdominalgia  
allergic purpura  
vomit  
abdominalgia  
abdominalgia  
abdominalgia  
nausea  
abdominalgia  
abdominalgia  
Indigestion  
vomit  
abdominalgia  
stomachache  
abdominalgia  
poor appetite  
malnutrition  
abdominalgia  
Bile reflux  
abdominalgia  
abdominalgia  
abdominalgia  
gastric ulcer  
abdominalgia(vomit)  
Indigestion  
Health check-up  
lose weight  
abdominalgia

abdominalgia

Indigestion

abdominalgia

abdominalgia

abdominalgia

abdominalgia

abdominalgia

abdominalgia

abdominalgia

malnutrition

abdominalgia

abdominalgia

vomit

abdominalgia

food allergy

abdominalgia

Health check-up

gastritis

nausea

gastroenteritis

abdominalgia

allergic purpura

spit blood(haemafecia)

vomit

vomit

abdominalgia

vomit

abdominalgia(vomit)

abdominalgia

spit blood

food allergy

abdominalgia

abdominalgia

gastritis

abdominalgia

abdominalgia

Developmental delay

vomit

abdominalgia

abdominalgia

nausea

vomit

abdominalgia

abdominalgia (haemafecia)

Health check-up

malnutrition

abdominalgia

abdominalgia

abdominalgia

Indigestion

vomit

abdominalgia

diarrhea

Developmental delay

abdominalgia

abdominalgia

vomit

vomit

allergic purpura

abdominalgia

abdominalgia

vomit

abdominalgia

abdominalgia

abdominalgia

vomit

allergic purpura

abdominalgia

Indigestion

abdominalgia

abdominalgia

Indigestion

nausea

abdominalgia

allergic purpura

abdominalgia

abdominalgia

abdominalgia

spit blood(melena)

abdominalgia(vomit)

vomit

abdominalgia

abdominalgia

abdominalgia

poor appetite

vomit

abdominalgia

abdominalgia

gastritis

abdominalgia

abdominalgia

abdominalgia

abdominalgia

abdominalgia

abdominalgia

gastritis

abdominalgia(diarrhea)

duodenal ulcer

vomit

gastritis

spit blood

Indigestion

Indigestion

food allergy

nausea

duodenal ulcer

allergic purpura

spit blood

abdominalgia

food allergy

abdominalgia

abdominalgia

abdominalgia

enteritis

abdominalgia

abdominalgia

duodenal ulcer

chronicnon-atrophic antral gastrit

abdominalgia

abdominalgia(chronicgastritis)

abdominalgia

vomit

allergic purpura

abdominalgia

abdominalgia

abdominalgia

abdominalgia

nausea

abdominalgia

abdominalgia(chronicgastritis)

abdominalgia

vomit

gastroenteritis

abdominalgia

abdominalgia

duodenal ulcer

Abnormal stool

abdominalgia

malnutrition

abdominalgia

abdominalgia

Indigestion

abdominalgia

abdominalgia

abdominalgia

stomachache

abdominalgia

vomit

nausea

vomit

gastroenteritis

abdominalgia

Reflux esophagitis

abdominalgia

abdominalgia

abdominalgia

malnutrition

acute gastroenteritis

abdominalgia

abdominalgia

abdominalgia

constipation(abdominalgia)

abdominalgiavomit

abdominalgia

abdominalgia

abdominalgia

lose weight

abdominalgia

Developmental delay

gastritis

Indigestion

abdominalgia

allergic purpura

vomit

abdominalgia

vomit

abdominalgia

abdominalgia

abdominalgia

abdominalgia

abdominalgia

vomit

chronicgastritis

allergic purpura

duodenal ulcer

spit blood

abdominalgia



vomit

abdominalgia

poor appetite

Intestinal flatulence

abdominalgia

vomit

vomit

abdominalgia

duodenal ulcer

abdominalgia

abdominalgia

abdominalgia

abdominalgia

vomit

abdominalgia

abdominalgia

abdominalgia

abdominalgia

abdominalgia

gastric ulcer

allergic purpura

abdominalgia

abdominalgia

abdominalgia

abdominalgia

abdominalgia

vomit

abdominalgia

gastric ulcer,

crying

allergic purpura

abdominalgia

abdominalgia

vomit

Indigestion

vomit

gastric ulcer

vomit

abdominalgia

gastroenteritis

vomit

nausea

poor appetite

duodenal ulcer

abdominalgia

abdominalgia

spit blood

abdominalgia

vomit

abdominalgia

abdominalgia

haemafecia

Allergic purpura

abdominalgia

abdominalgia

abdominalgia

chronic superficial gastritis

headache

abdominalgia

abdominalgia

abdominalgia

vomit

Developmental delay

abdominalgia

nausea

spit blood(, abdominalgia)

abdominalgia

Indigestion

Indigestion

vomit

abdominalgia

abdominalgia

vomit

poor appetite

nausea

abdominalgia

gastritis

abdominalgia

abdominalgia

allergic purpura

vomit

allergic purpura

abdominalgia

abdominalgia

malnutrition

food allergy

poor appetite

spit blood

peptic ulcer

vomit(vomit, spit blood)

vomit

abdominalgia

haemafecia

nausea

Indigestion

abdominalgia

Abnormal stool

Indigestion

abdominalgia

abdominalgia

abdominalgia (vomit)

vomit

allergic purpura

abdominalgia

respiratory tract infection, abdom

abdominalgia

Indigestion

abdominalgia

abdominalgia

Intestinal flatulence

Indigestion

abdominalgia

Gastrointestinal bleeding

Indigestion

spit blood

abdominalgia

abdominalgia

abdominalgia

anaemia

abdominalgia

abdominalgia

vomit

diarrhea

abdominalgia

abdominalgia

abdominalgia

abdominalgia

gastroenteritis

vomit

abdominal distention

vomit

vomit

Indigestion

Indigestion

abdominalgia

vomit

vomit(vomit, abdominalgia)

abdominalgia

abdominalgia

allergic purpura duodenal ulcer

abdominalgia

abdominalgia

Allergic purpura

abdominalgia

allergic purpura

vomit

food allergy

poor appetite

abdominalgia

gastritis

vomit

vomit

duodenal ulcer

abdominalgia

abdominalgia

abdominalgia(vomit)

vomit

duodenal ulcer

vomit

Helicobacter pylori infection

abdominalgia

abdominalgia

abdominalgia

poor appetite

generate heat, abdominalgia

malnutrition

abdominalgia

abdominalgia

abdominalgia

abdominalgia

constipation

Indigestion

nausea

poor appetite.

abdominalgia

peptic ulcer

abdominalgia (abdominalgia)

abdominalgia

constipation

abdominalgia

nausea

abdominalgia

Indigestion

Indigestion

malnutrition

anaemia

vomit

gastritis

abdominalgia

Duodenal bulbar ulcer

abdominalgia

abdominalgia

vomit

poor appetite

abdominalgia

gastroenteritis

stomachache

abdominalgia(abdominalgia, spit bl  
gastritis

abdominalgia

Helicobacter pylori infection

Helicobacter pylori infection

Indigestion

vomit

poor appetite

abdominalgia

Indigestion

abdominalgia

Short stature

vomit

chronicgastritis

abdominalgia

duodenal ulcer

halitosis

Allergic purpura

Indigestion

Developmental delay

abdominalgia

abdominalgia

Indigestion

abdominalgia

malnutrition

abdominalgia

malnutrition

abdominalgia

nausea

constipation

malnutrition

abdominalgia

nausea

abdominalgia

abdominalgia(, abdominal distentio  
esophageal stenosis

haemafecia

abdominalgia

vomit

poor appetite

abdominalgia

abdominalgia

vomit

Developmental delay

gastritis

Helicobacter pylori infection

Helicobacter pylori infection

abdominalgia

abdominalgia

abdominalgia

vomit

Indigestion

abdominalgia

abdominalgia

Developmental delay

acute gastroenteritis

duodenal ulcer

Health check-up

allergic purpura

chronicgastritis(acute )

abdominalgia

abdominalgia



duodenal ulcer

Helicobacter pylori infection

nausea

abdominalgia

Health check-up

vomit

abdominalgia

stomachache

Indigestion

halitosis

esophageal ulcer

abdominalgia

abdominalgia

stomachache

poor appetite

duodenal ulcer

Indigestion

poor appetite

duodenal ulcer

abdominalgia

Indigestion

abdominalgia

abdominalgia

vomit

vomit

gastritis

Developmental delay

nausea

abdominalgia

vomit

vomit

abdominalgia

abdominal distention

duodenal ulcer

abdominalgia

halitosis

Indigestion

constipation

Helicobacter pylori infection

abdominalgia

Indigestion

Indigestion

abdominalgia

poor appetite

constipation

nausea

abdominalgia

abdominalgia

Indigestion

halitosis

abdominalgia

abdominalgia

intussusception

abdominalgia

abdominalgia

vomit

abdominalgia

abdominalgia

abdominalgia

food allergy

Indigestion

abdominalgia

Health check-up

Indigestion

constipation

change of bowel habits

abdominalgia

malnutrition

lose weight

Indigestion

gastritis

food allergy

gastritis

Developmental delay

malnutrition

Indigestion

Indigestion

abdominalgia

abdominalgia

vomit

Helicobacter pylori infection

Developmental delay

gastritis

abdominalgia

abdominalgia(abdominal distention)

gastritis

duodenal ulcer

nausea

abdominalgia

abdominalgia

Abnormal stool

malnutrition

vomit

Indigestion

food allergy

malnutrition

malnutrition

food allergy

abdominalgia

abdominalgia

malnutrition

Indigestion

vomit

Indigestion

vomit

Developmental delay

food allergy

Indigestion

abdominalgia

abdominalgia

abdominalgia

malnutrition

abdominalgia

Abnormal stool

abdominalgia

vomit

colitis

chronicgastritis

Indigestion

Indigestion

poor appetite

Indigestion

food allergy

abdominalgia

vomit

abdominalgia

Helicobacter pylori infection

duodenal ulcer

allergic purpura

abdominalgia

Indigestion

abdominalgia

vomit

duodenal ulcer

malnutrition

constipation

abdominalgia

spit blood

Helicobacter pylori infection

vomit

vomit

abdominalgia

abdominalgia

Helicobacter pylori infection

lose weight

malnutrition

malnutrition

vomit

abdominalgia

abdominalgia

Abnormal stool

abdominalgia

Indigestion

Indigestion

abdominalgia

Helicobacter pylori infection

abdominalgia

abdominalgia

Flatulence

Indigestion

abdominalgia

abdominalgia

vomit

abdominalgia

abdominalgia

abdominalgia

nausea

vomit

abdominalgia  
abdominalgia  
duodenal ulcer  
duodenal ulcer  
vomit  
abdominalgia  
abdominalgia  
malnutrition  
abdominalgia  
abdominalgia  
food allergy  
poor appetite  
malnutrition  
Indigestion  
poor appetite  
vomit  
abdominalgia

Indigestion  
abdominalgia  
colitis  
Indigestion  
abdominalgia  
Indigestion  
nausea  
duodenal ulcer  
Gastrointestinal bleeding  
abdominalgia  
vomit  
abdominalgia  
abdominalgia  
gastritis  
abdominalgia  
abdominalgia  
poor appetite  
poor appetite  
diarrhea  
Indigestion  
abdominalgia  
food allergy  
abdominalgia  
duodenal ulcer

abdominalgia

chest pain

Health check-up

crying

vomit

vomit

abdominalgia

abdominalgia

Helicobacter pylori infection

vomit

nausea

stomachache

nausea

abdominalgia

abdominalgia

abdominalgia

abdominalgia

abdominalgia

abdominalgia

abdominalgia

Developmental delay

nausea

abdominalgia

food allergy

haemafecia

Health check-up

vomit

abdominalgia

Indigestion

abdominalgia

malnutrition

stomachache

stomachache

vomit

abdominalgia

abdominalgia

abdominalgia

vomit

abdominalgia

abdominalgia

poor appetite

abdominalgia

lose weight

Developmental delay

Health check-up

Indigestion

Indigestion

malnutrition

Abnormal stool

haemafecia

Indigestion

physical examination

lose weight

Indigestion

Developmental delay

abdominalgia

constipation

Indigestion

abdominalgia

abdominalgia

abdominalgia

abdominalgia

Helicobacter pylori infection

abdominalgia

abdominalgia

abdominalgia

abdominalgia

Helicobacter pylori infection

abdominalgia

abdominalgia

abdominalgia



vomit

poor appetite

abdominalgia

Helicobacter pylori infection

halitosis

abdominalgia

abdominalgia

abdominalgia

abdominalgia

abdominalgia

abdominalgia

malnutrition

poor appetite

Health check-up

spit blood

abdominalgia

constipation

vomit

vomit

abdominalgia

diarrhea

vomit

crying

Indigestion

abdominalgia

abdominalgia

duodenal ulcer

acute gastroenteritis

abdominalgia

nausea  
abdominalgia  
Indigestion

abdominalgia  
abdominalgia  
abdominalgia

chronic superficial gastritis  
abdominalgia

Developmental delay

Health check-up

food allergy

malnutrition

Indigestion

obesity

abdominalgia

Abdominal lymph node enlargement  
abdominalgia

Helicobacter pylori infection

abdominalgia

abdominalgia

abdominalgia

food allergy

abdominalgia

haemafecia

vomit

abdominalgia

vomit

hiccup

abdominalgia

allergic purpura

abdominalgia

abdominalgia

abdominalgia

abdominalgia

poor appetite

abdominalgia

abdominalgia

abdominalgia

abdominalgia

abdominalgia

abdominalgia

nausea

abdominalgia

abdominalgia

abdominalgia

abdominalgia

abdominalgia

nausea

duodenal ulcer

abdominalgia

abdominalgia

abdominal distention

Duodenal bulbar ulcer

vomit

Duodenal bulbar ulcer

abdominalgia

abdominalgia

vomit

vomit

abdominalgia

Duodenal bulbar ulcer

abdominalgia

abdominalgia

vomit

chronic superficial gastritis

abdominalgia

vomit

abdominalgia

stomachache

abdominalgia

vomit

Helicobacter pylori infection

abdominalgia

Indigestion

abdominalgia

Duodenal bulbar ulcer

abdominalgia

vomit

abdominalgia

nausea

gastritis

abdominalgia

abdominalgia

abdominalgia

Gastrointestinal bleeding

abdominalgia, vomit

abdominalgia

diarrhea

poor appetite

vomit

abdominalgia

anaemia

abdominalgia

abdominalgia

nausea

vomit

abdominalgia

vomit

abdominalgia, vomit

abdominalgia

abdominalgia

poor appetite

allergic purpura

abdominalgia

abdominalgia

Indigestion

abdominalgia

abdominalgia

abdominalgia

abdominalgia

abdominalgia

Indigestion

abdominalgia

vomit

vomit

poor appetite

abdominalgia

vomit

abdominalgia

gastroenteritis

abdominalgia

halitosis

stomachache

abdominal distention

abdominalgia

nausea

gastroenteritis

abdominalgia

abdominalgia

Helicobacter pylori infection相关性

abdominalgia

abdominalgia

abdominalgia

Helicobacter pylori infection

abdominalgia

abdominalgia

abdominalgia

abdominalgia

abdominalgia

abdominalgia

abdominalgia

abdominalgia

abdominalgia

malnutrition

abdominalgia

abdominalgia

spit blood

abdominalgia

haemafecia

abdominalgia

abdominalgia

abdominalgia

spit blood

abdominalgia

gastritis

abdominalgia

gastritis

allergic purpura  
abdominalgia  
  
abdominalgia  
chronicgastritis  
abdominalgia  
abdominalgia  
poor appetite  
abdominalgiagastritis

gastritis  
abdominalgia  
gastritis  
dysphagia  
abdominalgia  
gastritis  
vomit

peptic ulcer  
abdominalgia  
abdominalgia  
allergic purpura  
abdominalgia  
abdominalgia

abdominalgia

nausea

abdominalgia  
vomit

duodenal ulcer  
gastritis  
gastritis

abdominalgia, vomit  
abdominalgia

vomit  
anaemia

duodenal ulcer  
duodenal ulcer

abdominalgia  
gastritis

abdominalgia

abdominalgia

abdominalgia

abdominalgia

poor appetite

abdominalgia

abdominalgia

gastritis

abdominalgia

abdominalgia

abdominalgia

abdominalgia

abdominalgia

abdominalgia

peptic ulcer

abdominalgia

abdominalgia

vomit

chronic superficial gastritis(acut

haemafecia

abdominalgia

vomit

hiccup

vomit

esophageal stenosis

allergic purpura

food allergy

abdominalgia

abdominalgia(vomit)

abdominalgia

abdominalgia

vomit

Gastrointestinal bleeding

gastritis

spit blood

abdominalgia

gastritis

vomit

allergic purpura



abdominalgia

vomit

abdominalgia

abdominalgia

abdominalgia

vomit

abdominalgia

vomit(abdominalgiahaemafecia)

abdominalgia

abdominalgia

pneumonia

duodenal ulcer

abdominalgia

haemafecia

Helicobacter pylori infection

Gastrointestinal lesions

haemafecia

abdominalgia

abdominalgia

acute gastritis

vomit

gastritis

halitosis

abdominalgia

abdominalgia

abdominalgia

Gastrointestinal bleeding

gastritis

⊥abdominalgia

vomit

abdominalgia

abdominalgia

gastritis

vomit

abdominalgia

abdominalgia

abdominalgia(haemafecia)

abdominalgia

abdominalgia

abdominalgia

abdominalgia

abdominalgia

abdominalgia

abdominalgia

gastritis

abdominalgia

abdominalgia

abdominalgia

duodenal ulcer

abdominalgia

allergic purpura

abdominalgia

abdominalgia

abdominalgia

vomit

abdominalgia

abdominalgia

duodenal ulcer

vomit

Intestinal flatulence

gastritis

abdominalgia

abdominalgia

vomit

chronicdiarrhea

vomit

abdominalgia

abdominalgia

vomit

vomit

vomit

vomit

allergic purpura

Developmental delay

abdominalgia

Helicobacter pylori infection

vomit(abdominalgia)

duodenal ulcer

abdominalgia

abdominalgia

haemafecia

abdominalgia

abdominalgia

spit blood

vomit

vomit

Indigestion

nausea

gastroenteritis

abdominalgia

abdominalgia

abdominalgia

abdominalgia(, haemafecia)

abdominalgia

Health check-up

Gastrointestinal bleeding

abdominalgia

abdominalgia

abdominalgia

malnutrition

abdominalgia

poor appetite

abdominalgia

abdominalgia

nausea

pyloric channel ulcer

abdominalgia

allergic purpura

vomit(vomit)

epilepsy ESES

abdominalgia

abdominalgia

abdominalgia

abdominalgia

abdominalgia

vomit

abdominalgia

vomit

abdominalgia

abdominalgia

abdominalgia

abdominalgia

abdominalgia

allergic purpura

abdominalgia

abdominalgia

abdominalgia

vomit

abdominalgia

abdominalgia

abdominalgia

abdominalgia

abdominalgia

abdominalgia

haemafecia

malnutrition

abdominalgia

vomit

nausea

vomit

vomit

Gastrointestinal bleeding

vomit

abdominalgia

abdominalgia

abdominalgia

abdominalgia

abdominalgia

abdominalgia

abdominalgia

gastritis

abdominalgia

vomit

abdominalgia, anaemia

spit blood

abdominalgia

vomit

abdominalgia

gastritis

abdominalgia

Developmental delay

abdominalgia

abdominalgia

abdominalgia

abdominalgiaduodenal ulcer

gastritis

allergic purpura

duodenal ulcer

gastritis; Helicobacter pylori inf

abdominalgia

abdominalgia

Indigestion

abdominalgia

acute gastritis

abdominalgia, faint

duodenal ulcer

abdominalgia

duodenal ulcer

abdominalgia

abdominal distention

generate heat

abdominalgia(, abdominal distentio

haemafecia

abdominalgia

abdominalgia

abdominalgia

constipation

abdominalgia

abdominalgia

abdominalgia

abdominalgia  
abdominalgia  
poor appetite  
abdominalgia  
abdominalgia  
abdominalgia

vomit  
abdominalgia

abdominalgia

abdominalgia  
abdominalgia  
abdominalgia  
diarrhea

gastritis Multiple gastric polyps

abdominalgia, dysfunction of blood

abdominalgia  
abdominalgia  
abdominalgia  
abdominalgia  
abdominalgia  
abdominalgia  
duodenal ulcer

Duodenal bulbar ulcer

nausea  
nausea  
vomit

vomit

abdominalgia  
headache vomit  
abdominalgia  
poor appetite  
abdominalgia

hiccup

abdominalgia(abdominalgia, headac

chronic superficial gastritis  
abdominalgia

peptic ulcer

constipation

abdominalgia

vomit

abdominalgia(abdominalgia)

Indigestion

Indigestion

abdominalgia

abdominalgia Mesenteric lymph node

abdominalgia

chronicgastritis(acute )

vomit

abdominal distention(abdominal dis

chronicnon-atrophic antral gastrit

abdominalgia

allergic purpura

abdominalgia

duodenal ulcer

duodenal ulcer

abdominalgia

vomit

abdominalgia

lose weight

occult penis

malnutrition

nausea

abdominalgia

abdominal distention

Indigestion

abdominalgia

abdominalgia

abdominalgia

abdominalgia

vomit

nausea

Indigestion

abdominalgiaallergic purpura

gastroenteritis

abdominalgia

haemafecia

abdominalgia

faint

abdominalgia

nausea

vomit

gastroenteritis

abdominalgia

malnutrition

abdominalgia

vomit

abdominalgia

abdominalgia(, vomit)

abdominalgia

vomit

abdominalgia

spit blood

duodenal ulcer

Gastrointestinal bleeding

vomit

abdominalgia

abdominalgia

gastric ulcer

abdominalgia

duodenal ulcer

abdominalgiaallergic purpura

abdominalgia

cholecystitis

abdominalgia

malnutrition

malnutrition

abdominalgia



melena

abdominalgia

Allergic purpura

abdominalgia

gastric ulcer

nausea

allergic purpura

duodenal ulcer

Indigestion

anorexia

abdominalgia

spit blood

abdominalgia

abdominalgia

duodenal ulcer

abdominalgia

chronicgastroenteritis

anaemia

vomit

abdominalgia

abdominalgia

spit blood

abdominalgia

vomit

vomit

abdominalgia

abdominalgia

respiratory tract infection

abdominalgia

gastritis

peptic ulcer

abdominalgia

abdominalgia

abdominalgia

vomit

abdominalgia

abdominalgia

abdominalgia

abdominalgia

abdominalgia

abdominalgia

vomit

Gastrointestinal bleeding

abdominalgia

gastritis, Duodenitis

chronicgastritis esophageal ulce

Indigestion

Indigestion

Liver damage

poor appetite

nausea

abdominalgia

vomit

abdominalgia

abdominalgia

Indigestion

duodenal ulcer

abdominalgia

gastritis

abdominalgia

duodenal ulcer

abdominalgia

abdominalgia

abdominalgia

allergic purpura

vomit

abdominalgia

abdominalgia

abdominalgia

nausea

abdominalgia

abdominalgia

Indigestion

vomit

abdominalgia

stomachache

abdominalgia

poor appetite

malnutrition

abdominalgia

abdominalgia

Bile reflux

abdominalgia

abdominalgia

gastric ulcer

abdominalgia(vomit)

Indigestion

Health check-up

lose weight

abdominalgia

abdominalgia

Indigestion

abdominalgia

abdominalgia

abdominalgia

abdominalgia

abdominalgia

abdominalgia

abdominalgia

malnutrition

abdominalgia

abdominalgia

vomit

abdominalgia

food allergy

abdominalgia

Health check-up

gastritis

nausea

gastroenteritisAnd colitis

abdominalgia

allergic purpura

spit blood(haemafecia)

vomit

abdominalgia

vomit

abdominalgia(vomit)

vomit

abdominalgia

spit blood

food allergy

abdominalgia

abdominalgia

gastritis

abdominalgia

abdominalgia

Developmental delay

vomit

abdominalgia

abdominalgia

nausea

vomit

abdominalgia

abdominalgia (haemafecia)

Health check-up

malnutrition

abdominalgia

abdominalgia

abdominalgia

Indigestion

vomit

abdominalgia

diarrhea

Developmental delay

abdominalgia

abdominalgia

vomit

vomit

allergic purpura

abdominalgia

abdominalgia

vomit

abdominalgia

abdominalgia

abdominalgia

vomit

allergic purpura

abdominalgia

Indigestion

abdominalgia

abdominalgia

Indigestion

nausea

abdominalgia

allergic purpura

abdominalgia

abdominalgia

abdominalgia

spit blood (melena)

abdominalgia (vomit)

vomit

abdominalgia

abdominalgia

abdominalgia

poor appetite

vomit

abdominalgia

abdominalgia

gastritis

abdominalgia

abdominalgia

abdominalgia

abdominalgia

abdominalgia

abdominalgia

gastritis

abdominalgia(diarrhea)

duodenal ulcer

vomit

gastritis

spit blood

Indigestion

Indigestion

food allergy

nausea

duodenal ulcer

allergic purpura

spit blood

abdominalgia

food allergy

abdominalgia

abdominalgia

abdominalgia

enteritis

abdominalgia

abdominalgia

duodenal ulcer

chronicnon-atrophic antral gastrit

abdominalgia

abdominalgia(chronicgastritis)

abdominalgia

vomit

allergic purpura

abdominalgia

abdominalgia

abdominalgia

abdominalgia

nausea

abdominalgia

abdominalgia(chronicgastritis)

abdominalgia

vomit

gastroenteritis

abdominalgia

abdominalgia

duodenal ulcer

Abnormal stool

abdominalgia

malnutrition

abdominalgia

abdominalgia

Indigestion

abdominalgia

abdominalgia

abdominalgia

stomachache

abdominalgia

vomit

nausea

vomit

gastroenteritis

abdominalgia

Reflux esophagitis

abdominalgia

abdominalgia

abdominalgia

malnutrition

acute gastroenteritis

abdominalgia

abdominalgia

abdominalgia

constipation(abdominalgia)

abdominalgiavomit

abdominalgia

abdominalgia

abdominalgia

lose weight

abdominalgia

Developmental delay



gastritis

Indigestion

abdominalgia

allergic purpura

vomit

abdominalgia

vomit

abdominalgia

abdominalgia

abdominalgia

abdominalgia

abdominalgia

vomit

chronicgastritis

allergic purpura

duodenal ulcer

spit blood

abdominalgia

vomit

abdominalgia

poor appetite

Intestinal flatulence

abdominalgia

vomit

vomit

abdominalgia

duodenal ulcer

abdominalgia

abdominalgia

abdominalgia

abdominalgia

vomit

abdominalgia

abdominalgia

abdominalgia

abdominalgia

abdominalgia

gastric ulcer

allergic purpura

abdominalgia

abdominalgia

abdominalgia

abdominalgia

abdominalgia

vomit

abdominalgia

gastric ulcer,

crying

allergic purpura

abdominalgia

abdominalgia

vomit

Indigestion

vomit

gastric ulcer

vomit

abdominalgia

gastroenteritis

vomit

nausea

poor appetite

duodenal ulcer

abdominalgia

abdominalgia

spit blood

abdominalgia

vomit

abdominalgia

abdominalgia

haemafecia

Allergic purpura

abdominalgia

abdominalgia

abdominalgia

chronic superficial gastritis

headache

abdominalgia

abdominalgia

abdominalgia

vomit

Developmental delay

abdominalgia

nausea

spit blood(, abdominalgia)

abdominalgia

Indigestion

Indigestion

vomit

abdominalgia

abdominalgia

vomit

poor appetite

nausea

abdominalgia

gastritis

abdominalgia

abdominalgia

allergic purpura

vomit

allergic purpura

abdominalgia

abdominalgia

malnutrition

food allergy

poor appetite

spit blood

peptic ulcer

vomit(vomit, spit blood)

vomit

abdominalgia

haemafecia

nausea

Indigestion

abdominalgia

Abnormal stool

Indigestion

abdominalgia

abdominalgia

abdominalgia(vomit)

vomit

allergic purpura

abdominalgia

respiratory tract infection, abdom

abdominalgia

Indigestion

abdominalgia

abdominalgia

Intestinal flatulence

Indigestion

abdominalgia

Gastrointestinal bleeding

Indigestion

spit blood

abdominalgia

abdominalgia

abdominalgia

anaemia

abdominalgia

abdominalgia

vomit

diarrhea

abdominalgia

abdominalgia

abdominalgia

abdominalgia

gastroenteritis

vomit

abdominal distention

vomit

vomit

Indigestion

Indigestion

abdominalgia

vomit

vomit(vomit, abdominalgia)

abdominalgia

abdominalgia

abdominalgia

Allergic purpura

abdominalgia

allergic purpura duodenal ulcer

abdominalgia

allergic purpura

vomit

food allergy

poor appetite

abdominalgia

gastritis

vomit

vomit

duodenal ulcer

abdominalgia

abdominalgia

abdominalgia(vomit)

vomit

duodenal ulcer

vomit

Helicobacter pylori infection

abdominalgia

abdominalgia

abdominalgia

poor appetite

generate heat, abdominalgia

malnutrition

abdominalgia

abdominalgia

abdominalgia

abdominalgia

constipation

Indigestion

nausea

poor appetite.

abdominalgia

peptic ulcer

abdominalgia(abdominalgia)

abdominalgia

constipation

abdominalgia

nausea

Indigestion

abdominalgia

Indigestion

malnutrition

anaemia

vomit

gastritis

abdominalgia

Duodenal bulbar ulcer

abdominalgia

abdominalgia

vomit

poor appetite

abdominalgia

gastroenteritis

stomachache

abdominalgia(abdominalgia, spit bl

gastritis

vomit

poor appetite

abdominalgia

Helicobacter pylori infection

Helicobacter pylori infection

Indigestion

abdominalgia

Indigestion

abdominalgia

Short stature

vomit

chronicgastritis  
abdominalgia  
duodenal ulcer

halitosis

Allergic purpura  
Indigestion

Developmental delay

abdominalgia

abdominalgia

Indigestion

abdominalgia

malnutrition

abdominalgia

malnutrition

abdominalgia

nausea

constipation

abdominalgia

malnutrition

nausea

abdominalgia

abdominalgia(, abdominal distentio

esophageal stenosis

haemafecia

abdominalgia

vomit

poor appetite

abdominalgia

abdominalgia

vomit

Developmental delay

gastritis



Helicobacter pylori infection

Helicobacter pylori infection

abdominalgia

abdominalgia

abdominalgia

vomit

Indigestion

abdominalgia

abdominalgia

Developmental delay

acute gastroenteritis

duodenal ulcer

Health check-up

allergic purpura

chronicgastritis(acute )

abdominalgia

abdominalgia

duodenal ulcer

Helicobacter pylori infection

nausea

abdominalgia

Health check-up

vomit

abdominalgia

stomachache

Indigestion

halitosis

esophageal ulcer

abdominalgia

abdominalgia

stomachache

poor appetite

duodenal ulcer

Indigestion

poor appetite

duodenal ulcer

abdominalgia

Indigestion

abdominalgia

abdominalgia

vomit

vomit

gastritis

Developmental delay

nausea

abdominalgia

vomit

vomit

abdominalgia

abdominal distention

duodenal ulcer

abdominalgia

halitosis

Indigestion

constipation

Helicobacter pylori infection

abdominalgia

Indigestion

Indigestion

abdominalgia

poor appetite

constipation

nausea

abdominalgia

abdominalgia

Indigestion

halitosis

abdominalgia

abdominalgia

intussusception

abdominalgia

abdominalgia

vomit

abdominalgia

abdominalgia

abdominalgia

food allergy

Indigestion

abdominalgia

Health check-up

Indigestion

constipation

change of bowel habits

abdominalgia

malnutrition

lose weight

Indigestion

gastritis

food allergy

gastritis

Developmental delay

malnutrition

Indigestion

Indigestion

abdominalgia

abdominalgia

vomit

Helicobacter pylori infection

Developmental delay

gastritis

abdominalgia

abdominalgia(abdominal distention)

gastritis

abdominalgia

duodenal ulcer

nausea

abdominalgia

Abnormal stool

malnutrition

vomit

Indigestion

food allergy

malnutrition

malnutrition

food allergy

abdominalgia

abdominalgia

malnutrition

Indigestion

vomit

Indigestion

vomit

Developmental delay

food allergy

Indigestion

abdominalgia

abdominalgia

abdominalgia

malnutrition

abdominalgia

Abnormal stool

abdominalgia

vomit

colitis

chronicgastritis

Indigestion

Indigestion

poor appetite

Indigestion

food allergy

abdominalgia

vomit

abdominalgia

Helicobacter pylori infection

duodenal ulcer

allergic purpura

abdominalgia

Indigestion

abdominalgia

vomit

duodenal ulcer

malnutrition

constipation

abdominalgia

spit blood

Helicobacter pylori infection

vomit

vomit

abdominalgia

abdominalgia

Helicobacter pylori infection

lose weight

malnutrition

malnutrition

vomit

abdominalgia

abdominalgia

Abnormal stool

abdominalgia

Indigestion

Indigestion

abdominalgia

Helicobacter pylori infection

abdominalgia

abdominalgia

Flatulence

Indigestion

abdominalgia

abdominalgia

vomit

abdominalgia

abdominalgia

abdominalgia

nausea

vomit

abdominalgia

abdominalgia

duodenal ulcer

duodenal ulcer

vomit

abdominalgia

abdominalgia

malnutrition

abdominalgia

abdominalgia

food allergy

poor appetite

malnutrition

Indigestion

poor appetite

vomit

abdominalgia

Indigestion

abdominalgia

colitis

Indigestion

abdominalgia

Indigestion

nausea

duodenal ulcer

Gastrointestinal bleeding

abdominalgia

vomit

abdominalgia

abdominalgia

gastritis

abdominalgia

abdominalgia

poor appetite

poor appetite

diarrhea

Indigestion

abdominalgia

food allergy

abdominalgia

duodenal ulcer

abdominalgia

chest pain

Health check-up

crying

vomit

vomit

abdominalgia

abdominalgia

Helicobacter pylori infection

vomit

nausea

stomachache

nausea

abdominalgia

abdominalgia

abdominalgia

abdominalgia

abdominalgia  
abdominalgia  
abdominalgia  
Developmental delay  
nausea  
abdominalgia  
food allergy  
haemafecia  
Health check-up  
vomit

abdominalgia  
Indigestion  
abdominalgia  
malnutrition  
stomachache  
stomachache  
vomit

abdominalgia  
abdominalgia  
abdominalgia  
vomit  
abdominalgia  
abdominalgia  
poor appetite  
abdominalgia

lose weight

Developmental delay

Health check-up

Indigestion

Indigestion

malnutrition

Abnormal stool

haemafecia

Indigestion

physical examination

lose weight



Indigestion  
Developmental delay  
abdominalgia  
constipation  
Indigestion

abdominalgia  
abdominalgia  
abdominalgia  
abdominalgia

Helicobacter pylori infection  
abdominalgia  
abdominalgia  
abdominalgia  
abdominalgia

Helicobacter pylori infection  
abdominalgia  
abdominalgia  
abdominalgia

vomit  
poor appetite  
abdominalgia

Helicobacter pylori infection  
halitosis  
abdominalgia  
abdominalgia

abdominalgia  
abdominalgia  
abdominalgia  
abdominalgia  
malnutrition

poor appetite

Health check-up

spit blood

abdominalgia

constipation

vomit

vomit

abdominalgia

diarrhea

vomit

crying

Indigestion

abdominalgia

abdominalgia

duodenal ulcer

acute gastroenteritis

abdominalgia

nausea

abdominalgia

Indigestion

abdominalgia

abdominalgia

abdominalgia

chronic superficial gastritis

abdominalgia

Developmental delay

Health check-up

food allergy

malnutrition

Indigestion

obesity

abdominalgia

Abdominal lymph node enlargement

abdominalgia

Helicobacter pylori infection

abdominalgia

abdominalgia

abdominalgia

food allergy

abdominalgia

haemafecia

vomit

abdominalgia

vomit

abdominalgia

hiccup

allergic purpura

abdominalgia

abdominalgia

abdominalgia

abdominalgia

poor appetite

abdominalgia

abdominalgia

abdominalgia

abdominalgia

abdominalgia

abdominalgia

nausea

abdominalgia

abdominalgia

abdominalgia

abdominalgia

abdominalgia

nausea  
duodenal ulcer  
abdominalgia

abdominalgia  
abdominal distention  
vomit  
abdominalgia

Duodenal bulbar ulcer  
vomit  
abdominalgia

Duodenal bulbar ulcer  
vomit

Duodenal bulbar ulcer  
abdominalgia

Duodenal bulbar ulcer  
vomit

Duodenal bulbar ulcer  
abdominalgia  
abdominalgia  
vomit  
vomit  
abdominalgia

chronic superficial gastritis

Duodenal bulbar ulcer  
abdominalgia  
abdominalgia  
vomit  
abdominalgia  
abdominalgia  
abdominalgia  
abdominalgia  
abdominalgia

abdominalgia  
abdominalgia  
abdominalgia  
abdominalgia  
abdominalgia

abdominalgia  
abdominalgia  
abdominalgia  
vomit

stomachache

abdominalgia  
vomit

Helicobacter pylori infection

abdominalgia  
Indigestion  
abdominalgia

Duodenal bulbar ulcer

abdominalgia  
vomit  
abdominalgia

nausea  
gastritis

abdominalgia  
abdominalgia

abdominalgia, vomit  
abdominalgia

Gastrointestinal bleeding  
abdominalgia

diarrhea

poor appetite

vomit

abdominalgia

abdominalgia  
abdominalgia  
abdominalgia

abdominalgia

abdominalgia

abdominalgia  
abdominalgia  
abdominalgia

abdominalgia

abdominalgia

anaemia

abdominalgia

abdominalgia

nausea

vomit

abdominalgia

vomit

abdominalgia, vomit

abdominalgia

abdominalgia

poor appetite

allergic purpura

abdominalgia

abdominalgia

Indigestion

abdominalgia

abdominalgia

abdominalgia

abdominalgia

abdominalgia

Indigestion

abdominalgia

vomit

vomit

poor appetite

abdominalgia

vomit

abdominalgia

gastroenteritis

abdominalgia

halitosis

stomachache

abdominalgia

abdominal distention

nausea

gastroenteritis

abdominalgia

abdominalgia

Helicobacter pylori infection相关性

abdominalgia

abdominalgia

abdominalgia

Helicobacter pylori infection

abdominalgia

abdominalgia

abdominalgia

abdominalgia

abdominalgia

abdominalgia

abdominalgia

abdominalgia

abdominalgia

malnutrition

abdominalgia

abdominalgia

spit blood

abdominalgia

haemafecia

abdominalgia

abdominalgia

abdominalgia

spit blood

abdominalgia

gastritis

abdominalgia

gastritis

allergic purpura

abdominalgia

abdominalgia

chronicgastritis

abdominalgia

abdominalgia

poor appetite  
abdominalgiagastritis

gastritis  
abdominalgia  
gastritis  
dysphagia  
abdominalgia

gastritis  
abdominalgia  
vomit  
abdominalgia  
abdominalgia  
allergic purpura  
abdominalgia

nausea  
peptic ulcer

abdominalgia  
abdominalgia  
vomit

duodenal ulcer  
gastritis  
gastritis

abdominalgia, vomit  
abdominalgia

vomit  
anaemia

duodenal ulcer  
duodenal ulcer

abdominalgia  
gastritis

abdominalgia  
abdominalgia  
abdominalgia  
abdominalgia

poor appetite  
abdominalgia  
abdominalgia



gastritis

abdominalgia

abdominalgia

abdominalgia

abdominalgia

abdominalgia

abdominalgia

peptic ulcer

abdominalgia

abdominalgia

vomit

chronic superficial gastritis(acut

haemafecia

abdominalgia

vomit

hiccup

vomit

esophageal stenosis

allergic purpura

food allergy

abdominalgia

abdominalgia(vomit)

abdominalgia

abdominalgia

vomit

Gastrointestinal bleeding

gastritis

spit blood

abdominalgia

gastritis

vomit

vomit

allergic purpura

abdominalgia

abdominalgia

abdominalgia

abdominalgia

vomit

abdominalgia

vomit(abdominalgiahaemafecia)

abdominalgia

abdominalgia

pneumonia

duodenal ulcer

abdominalgia

haemafecia

Helicobacter pylori infection

Gastrointestinal lesions

haemafecia

abdominalgia

abdominalgia

acute gastritis

vomit

gastritis

halitosis

abdominalgia

abdominalgia

abdominalgia

Gastrointestinal bleeding

gastritis

⌈abdominalgia

vomit

abdominalgia

abdominalgia

gastritis

vomit

abdominalgia

abdominalgia

abdominalgia(haemafecia)

abdominalgia

abdominalgia

abdominalgia

abdominalgia

abdominalgia

abdominalgia

gastritis

abdominalgia

abdominalgia

abdominalgia

abdominalgia

duodenal ulcer

abdominalgia

allergic purpura

abdominalgia

abdominalgia

abdominalgia

abdominalgia

abdominalgia

vomit

duodenal ulcer

vomit

Intestinal flatulence

abdominalgia

gastritis

abdominalgia

vomit

chronicdiarrhea

vomit

abdominalgia

abdominalgia

vomit

vomit

vomit

vomit

allergic purpura

Developmental delay

abdominalgia

Helicobacter pylori infection

vomit(abdominalgia)

abdominalgia

duodenal ulcer

abdominalgia

haemafecia

abdominalgia

abdominalgia

spit blood

vomit

vomit

Indigestion

nausea

gastroenteritis

abdominalgia

abdominalgia

abdominalgia

abdominalgia(, haemafecia)

Health check-up

abdominalgia

Gastrointestinal bleeding

abdominalgia

abdominalgia

abdominalgia

malnutrition

abdominalgia

poor appetite

abdominalgia

abdominalgia

nausea

pyloric channel ulcer

abdominalgia

allergic purpura

vomit(vomit)

epilepsy ESES

abdominalgia

abdominalgia

abdominalgia

abdominalgia

abdominalgia

vomit

abdominalgia

vomit

abdominalgia

abdominalgia

abdominalgia

abdominalgia

abdominalgia

allergic purpura

abdominalgia

abdominalgia

abdominalgia

vomit

abdominalgia

abdominalgia

abdominalgia

abdominalgia

abdominalgia

abdominalgia

haemafecia

malnutrition

abdominalgia

vomit

nausea

vomit

vomit

Gastrointestinal bleeding

vomit

abdominalgia

abdominalgia

abdominalgia

abdominalgia

abdominalgia

abdominalgia

gastritis

abdominalgia

abdominalgia

vomit

abdominalgia, anaemia

spit blood

abdominalgia

vomit

abdominalgia

gastritis

abdominalgia

Developmental delay

abdominalgia

abdominalgia

abdominalgia

abdominalgiaduodenal ulcer

Indigestion

gastritis

abdominalgia

abdominalgia

allergic purpura

duodenal ulcer

gastritis; Helicobacter pylori inf

abdominalgia

acute gastritis

abdominalgia, faint

duodenal ulcer

abdominalgia

duodenal ulcer

abdominalgia

abdominal distention

generate heat

abdominalgia(, abdominal distentio

haemafecia

abdominalgia

abdominalgia

abdominalgia

constipation

abdominalgia

abdominalgia

abdominalgia

abdominalgia

abdominalgia

poor appetite

abdominalgia

abdominalgia

abdominalgia

vomit

abdominalgia

abdominalgia

abdominalgia

abdominalgia

abdominalgia

diarrhea

gastritis Multiple gastric polyps

abdominalgia, dysfunction of blood

abdominalgia

abdominalgia

abdominalgia

abdominalgia

abdominalgia

duodenal ulcer

Duodenal bulbar ulcer

nausea

nausea

vomit

vomit

abdominalgia

headache vomit

abdominalgia

poor appetite

abdominalgia

hiccup

abdominalgia(abdominalgia, headac

chronic superficial gastritis

abdominalgia

peptic ulcer

constipation

vomit

abdominalgia

abdominalgia(abdominalgia)

Indigestion

Indigestion  
abdominalgia

abdominalgia Mesenteric lymph node

chronicgastritis(acute )

abdominalgia

vomit

chronicnon-atrophic antral gastrit

abdominal distention(abdominal dis

abdominalgia

allergic purpura

abdominalgia

duodenal ulcer

duodenal ulcer

abdominalgia

vomit

abdominalgia

lose weight

occult penis

malnutrition

nausea

abdominalgia

abdominal distention

Indigestion

abdominalgia

abdominalgia

abdominalgia

abdominalgia

vomit

nausea

Indigestion

abdominalgiaallergic purpura

gastroenteritis

abdominalgia

haemafecia

abdominalgia

faint



abdominalgia

nausea

vomit

gastroenteritis

abdominalgia

malnutrition

abdominalgia

vomit

abdominalgia

abdominalgia(, vomit)

abdominalgia

vomit

abdominalgia

spit blood

duodenal ulcer

Gastrointestinal bleeding

vomit

abdominalgia

abdominalgia

gastric ulcer

abdominalgia

duodenal ulcer

abdominalgiaallergic purpura

abdominalgia

cholecystitis

abdominalgia

malnutrition

malnutrition

abdominalgia

melen

abdominalgia

Allergic purpura

abdominalgia

gastric ulcer

nausea

allergic purpura

duodenal ulcer

Indigestion

anorexia

abdominalgia

spit blood

abdominalgia

abdominalgia

duodenal ulcer

abdominalgia

chronicgastroenteritis

anaemia

vomit

abdominalgia

abdominalgia

spit blood

abdominalgia

vomit

vomit

abdominalgia

abdominalgia

respiratory tract infection

gastritis

abdominalgia

abdominalgia

abdominalgia

peptic ulcer

abdominalgia

vomit

abdominalgia

abdominalgia

abdominalgia

abdominalgia

abdominalgia

vomit

Gastrointestinal bleeding

abdominalgia

abdominalgia

gastritis, Duodenitis

chronicgastritis esophageal ulce

Indigestion

Indigestion

Liver damage

poor appetite

nausea

vomit

abdominalgia

abdominalgia

abdominalgia

Indigestion

duodenal ulcer

abdominalgia

gastritis

abdominalgia

duodenal ulcer

abdominalgia

abdominalgia

abdominalgia

allergic purpura

vomit

abdominalgia

abdominalgia

abdominalgia

nausea

abdominalgia

abdominalgia

Indigestion

vomit

abdominalgia

stomachache

abdominalgia

poor appetite

malnutrition

abdominalgia

Bile reflux

abdominalgia

abdominalgia

abdominalgia

gastric ulcer

abdominalgia(vomit)

Indigestion

Health check-up

lose weight

abdominalgia

abdominalgia

Indigestion

abdominalgia

abdominalgia

abdominalgia

abdominalgia

abdominalgia

abdominalgia

malnutrition

abdominalgia

abdominalgia

abdominalgia

vomit

abdominalgia

food allergy

abdominalgia

Health check-up

gastritis

nausea

gastroenteritisAnd colitis

abdominalgia

allergic purpura

spit blood(haemafecia)

vomit

abdominalgia

vomit

abdominalgia(vomit)

vomit

abdominalgia

spit blood

food allergy

abdominalgia

abdominalgia

gastritis

abdominalgia

abdominalgia

Developmental delay

abdominalgia

abdominalgia

vomit

nausea

vomit

abdominalgia

abdominalgia(haemafecia)

Health check-up

malnutrition

abdominalgia

abdominalgia

abdominalgia

Indigestion

vomit

abdominalgia

diarrhea

Developmental delay

abdominalgia

abdominalgia

vomit

vomit

allergic purpura

abdominalgia

abdominalgia

vomit

abdominalgia

abdominalgia

allergic purpura

abdominalgia

vomit

abdominalgia

Indigestion

abdominalgia

abdominalgia

Indigestion

nausea

abdominalgia

allergic purpura

abdominalgia

abdominalgia

spit blood(melena)

abdominalgia

abdominalgia(vomit)

vomit

abdominalgia

abdominalgia

abdominalgia

vomit

poor appetite

abdominalgia

abdominalgia

gastritis

abdominalgia

abdominalgia

abdominalgia

abdominalgia

abdominalgia

abdominalgia

gastritis

abdominalgia (diarrhea)

duodenal ulcer

vomit

spit blood

gastritis

Indigestion

Indigestion

food allergy

nausea

duodenal ulcer

allergic purpura

spit blood

abdominalgia

food allergy

abdominalgia

abdominalgia

abdominalgia

enteritis

abdominalgia

abdominalgia

duodenal ulcer

chronicnon-atrophic antral gastrit

abdominalgia

abdominalgia(chronicgastritis)

abdominalgia

vomit

allergic purpura

abdominalgia

abdominalgia

abdominalgia

abdominalgia

nausea

abdominalgia

abdominalgia(chronicgastritis)

abdominalgia

vomit

gastroenteritis

abdominalgia

abdominalgia

duodenal ulcer

Abnormal stool

abdominalgia

malnutrition

abdominalgia

abdominalgia

Indigestion

abdominalgia



abdominalgia

abdominalgia

stomachache

abdominalgia

vomit

nausea

vomit

gastroenteritis

abdominalgia

Reflux esophagitis

abdominalgia

abdominalgia

abdominalgia

malnutrition

acute gastroenteritis

abdominalgia

abdominalgia

abdominalgia

constipation(abdominalgia)

abdominalgiavomit

abdominalgia

abdominalgia

abdominalgia

lose weight

Indigestion

abdominalgia

Developmental delay

gastritis

abdominalgia

allergic purpura

vomit

abdominalgia

vomit

abdominalgia

abdominalgia

abdominalgia

abdominalgia

abdominalgia

vomit

chronicgastritis

allergic purpura

duodenal ulcer

spit blood

abdominalgia

vomit

abdominalgia

poor appetite

Intestinal flatulence

abdominalgia

vomit

vomit

abdominalgia

duodenal ulcer

abdominalgia

abdominalgia

abdominalgia

abdominalgia

vomit

abdominalgia

abdominalgia

abdominalgia

abdominalgia

abdominalgia

gastric ulcer

allergic purpura

abdominalgia  
abdominalgia  
abdominalgia  
abdominalgia  
abdominalgia  
vomit  
abdominalgia  
  
gastric ulcer,  
  
crying  
allergic purpura

abdominalgia  
abdominalgia  
vomit  
Indigestion  
vomit  
gastric ulcer  
vomit  
abdominalgia  
vomit  
  
gastroenteritis  
nausea  
  
poor appetite  
  
abdominalgia  
  
duodenal ulcer  
  
abdominalgia  
spit blood  
  
abdominalgia  
  
vomit  
  
abdominalgia  
  
abdominalgia  
  
Allergic purpura  
  
haemafecia  
  
abdominalgia  
  
abdominalgia

abdominalgia

chronic superficial gastritis

headache

abdominalgia

abdominalgia

abdominalgia

vomit

Developmental delay

abdominalgia

nausea

spit blood(, abdominalgia)

abdominalgia

Indigestion

Indigestion

abdominalgia

vomit

abdominalgia

vomit

poor appetite

nausea

abdominalgia

abdominalgia

abdominalgia

allergic purpura

gastritis

vomit

allergic purpura

abdominalgia

abdominalgia

malnutrition

food allergy

poor appetite

spit blood

peptic ulcer

vomit(vomit, spit blood)

vomit

haemafecia

abdominalgia

nausea

Indigestion

abdominalgia

Abnormal stool

Indigestion

abdominalgia

abdominalgia

abdominalgia(vomit)

vomit

abdominalgia

allergic purpura

respiratory tract infection, abdom

abdominalgia

Indigestion

abdominalgia

abdominalgia

Intestinal flatulence

Indigestion

abdominalgia

Gastrointestinal bleeding

Indigestion

spit blood

abdominalgia

abdominalgia

abdominalgia

anaemia

abdominalgia

abdominalgia

vomit

diarrhea

abdominalgia

abdominalgia

abdominalgia

gastroenteritis

vomit

abdominal distention

vomit

vomit

abdominalgia

Indigestion

Indigestion

abdominalgia

vomit

vomit(vomit, abdominalgia)

abdominalgia

abdominalgia

allergic purpura duodenal ulcer

abdominalgia

abdominalgia

Allergic purpura

abdominalgia

allergic purpura

vomit

food allergy

poor appetite

vomit

gastritis

abdominalgia

vomit

duodenal ulcer

abdominalgia

abdominalgia

abdominalgia(vomit)

vomit

duodenal ulcer

vomit

Helicobacter pylori infection

abdominalgia

abdominalgia

abdominalgia

poor appetite

generate heat, abdominalgia

malnutrition

abdominalgia

abdominalgia

abdominalgia

abdominalgia

constipation

Indigestion

nausea

poor appetite。

abdominalgia

peptic ulcer

abdominalgia(abdominalgia)

abdominalgia

constipation

abdominalgia

nausea

abdominalgia

Indigestion

Indigestion

malnutrition

anaemia

gastritis

vomit

abdominalgia

Duodenal bulbar ulcer

abdominalgia

abdominalgia

vomit

poor appetite

abdominalgia

gastroenteritis

stomachache

abdominalgia(abdominalgia, spit bl

gastritis

vomit

poor appetite

abdominalgia

Helicobacter pylori infection

Helicobacter pylori infection

Indigestion

abdominalgia

Indigestion

abdominalgia

Short stature

vomit

chronicgastritis

abdominalgia

duodenal ulcer

halitosis



Allergic purpura

Indigestion

Developmental delay

abdominalgia

abdominalgia

Indigestion

abdominalgia

abdominalgia

malnutrition

malnutrition

abdominalgia

nausea

constipation

malnutrition

abdominalgia

abdominalgia

nausea

abdominalgia(, abdominal distentio

esophageal stenosis

haemafecia

abdominalgia

vomit

poor appetite

abdominalgia

abdominalgia

vomit

gastritis

Developmental delay

Helicobacter pylori infection

abdominalgia

Helicobacter pylori infection

vomit

abdominalgia

abdominalgia

Indigestion

abdominalgia

abdominalgia

Developmental delay

acute gastroenteritis

duodenal ulcer

Health check-up

allergic purpura

chronicgastritis(acute )

abdominalgia

abdominalgia

duodenal ulcer

Helicobacter pylori infection

nausea

abdominalgia

Health check-up

vomit

abdominalgia

halitosis

stomachache

Indigestion

esophageal ulcer

abdominalgia

abdominalgia

stomachache

poor appetite

duodenal ulcer

Indigestion

poor appetite

duodenal ulcer

abdominalgia

Indigestion

abdominalgia

abdominalgia

vomit

vomit

gastritis

Developmental delay

nausea

abdominalgia

vomit

vomit

abdominalgia

abdominal distention

duodenal ulcer

abdominalgia

halitosis

Indigestion

constipation

Helicobacter pylori infection

abdominalgia

Indigestion

Indigestion

abdominalgia

poor appetite

constipation

nausea

abdominalgia

abdominalgia

Indigestion

halitosis

abdominalgia

abdominalgia

abdominalgia

intussusception

abdominalgia

vomit

abdominalgia

abdominalgia

abdominalgia

food allergy

Indigestion

abdominalgia

Health check-up

Indigestion

constipation

change of bowel habits

abdominalgia

malnutrition

Indigestion

lose weight

food allergy

gastritis

gastritis

Developmental delay

malnutrition

Indigestion

abdominalgia

Indigestion

abdominalgia

vomit

Helicobacter pylori infection

Developmental delay

gastritis

abdominalgia

abdominalgia(abdominal distention)

gastritis

nausea

duodenal ulcer

abdominalgia

abdominalgia

Abnormal stool

vomit

malnutrition

food allergy

Indigestion

malnutrition

malnutrition

food allergy

abdominalgia

abdominalgia

malnutrition

Indigestion

Indigestion

vomit

vomit

Developmental delay

food allergy

Indigestion

abdominalgia

abdominalgia

abdominalgia

chronicgastritis

malnutrition

abdominalgia

Abnormal stool

abdominalgia

vomit

colitis

Indigestion

Indigestion

poor appetite

Indigestion

food allergy

abdominalgia

vomit

abdominalgia

Helicobacter pylori infection

duodenal ulcer

allergic purpura

Indigestion

abdominalgia

abdominalgia

vomit

duodenal ulcer

malnutrition

constipation

abdominalgia

spit blood

Helicobacter pylori infection

vomit

vomit

abdominalgia

abdominalgia

Helicobacter pylori infection

lose weight

malnutrition

malnutrition

vomit

abdominalgia

abdominalgia

Abnormal stool

Helicobacter pylori infection

Indigestion

abdominalgia

abdominalgia

Indigestion

abdominalgia

abdominalgia

Flatulence

Indigestion

abdominalgia

abdominalgia

vomit

abdominalgia

abdominalgia

abdominalgia

nausea

vomit

abdominalgia

abdominalgia

duodenal ulcer

duodenal ulcer

vomit

abdominalgia

abdominalgia

malnutrition

abdominalgia

abdominalgia

food allergy

poor appetite

malnutrition

Indigestion

poor appetite

vomit

abdominalgia

Indigestion

abdominalgia

colitis

Indigestion

abdominalgia

Indigestion

nausea  
duodenal ulcer  
Gastrointestinal bleeding  
abdominalgia  
abdominalgia  
abdominalgia  
vomit  
gastritis  
abdominalgia  
abdominalgia  
poor appetite  
poor appetite  
abdominalgia  
diarrhea  
Indigestion  
food allergy  
abdominalgia  
duodenal ulcer  
abdominalgia  
chest pain  
crying  
Health check-up  
vomit  
vomit  
abdominalgia  
abdominalgia  
  
Helicobacter pylori infection  
vomit  
nausea  
stomachache  
nausea  
abdominalgia  
abdominalgia  
abdominalgia  
abdominalgia  
abdominalgia  
abdominalgia  
Developmental delay  
abdominalgia  
abdominalgia  
nausea  
food allergy



haemafecia

Health check-up

vomit

abdominalgia

Indigestion

abdominalgia

malnutrition

stomachache

stomachache

vomit

abdominalgia

abdominalgia

abdominalgia

abdominalgia

vomit

abdominalgia

poor appetite

abdominalgia

lose weight

Developmental delay

Health check-up

Indigestion

Indigestion

malnutrition

Abnormal stool

haemafecia

Indigestion

physical examination

lose weight

Developmental delay

abdominalgia

constipation

Indigestion

Indigestion

abdominalgia

abdominalgia

abdominalgia

abdominalgia

Helicobacter pylori infection

abdominalgia

abdominalgia

abdominalgia

abdominalgia

Helicobacter pylori infection

abdominalgia

abdominalgia

abdominalgia

vomit

poor appetite

abdominalgia

Helicobacter pylori infection

halitosis

abdominalgia

abdominalgia

abdominalgia

abdominalgia

abdominalgia

abdominalgia

malnutrition

poor appetite

Health check-up

spit blood

abdominalgia

constipation

vomit

vomit

abdominalgia

diarrhea

vomit

crying

Indigestion

abdominalgia

abdominalgia

duodenal ulcer

acute gastroenteritis

abdominalgia

nausea

abdominalgia

Indigestion

abdominalgia

abdominalgia

abdominalgia

chronic superficial gastritis

abdominalgia

Developmental delay

Health check-up

food allergy

malnutrition

Indigestion

obesity

abdominalgia

Abdominal lymph node enlargement

abdominalgia

Helicobacter pylori infection

abdominalgia

abdominalgia

abdominalgia

food allergy

abdominalgia

haemafecia

vomit

abdominalgia

vomit

hiccup

abdominalgia

allergic purpura

abdominalgia

abdominalgia

abdominalgia

abdominalgia

poor appetite

abdominalgia

abdominalgia

abdominalgia

abdominalgia

abdominalgia

abdominalgia

nausea

abdominalgia

abdominalgia

abdominalgia

abdominalgia

abdominalgia

nausea

duodenal ulcer

abdominalgia

abdominalgia

abdominal distention
